# Supplementary material for: Planar chiral [2.2]paracyclophane-based phosphine–phenols: use in enantioselective [3 + 2] annulations of allenoates andN-tosylimines
Source: Royal Society of Chemistry journal article supplement (doi:10.1039/c8ob00248g), 2018-01-01
Supplement: c8ob00248g1.pdf [file c8ob00248g1.pdf]

## Supporting Information

### Planar chiral [2.2]paracyclophane-based phosphine-phenols: Use in enantioselective [3+2] annulations of allenoates and *N*-tosylimines

Shinji Kitagaki,\* Kento Nakamura, Chiharu Kawabata, Asuna Ishikawa, Naoko Takenaga  
and Keisuke Yoshida

*Faculty of Pharmacy, Meijo University, 150 Yagotoyama, Tempaku-ku, Nagoya 468-8503, Japan.*

#### **Contents**

|     |                                                                         |     |
|-----|-------------------------------------------------------------------------|-----|
| (1) | General Information                                                     | S2  |
| (2) | Effects of the substituent on the imine nitrogen atom                   | S2  |
| (3) | Preparation of catalyst ( <i>S<sub>p</sub></i> )- <b>1c</b>             | S2  |
| (4) | Determination of the absolute configuration for <b>5j</b> and <b>5m</b> | S4  |
| (5) | <sup>1</sup> H and <sup>13</sup> C NMR Spectra                          | S5  |
| (6) | HPLC Data                                                               | S29 |

## (1) General Information

Melting point (mp) was measured by Yanaco melting point apparatus MP-500D and uncorrected.  $^1\text{H}$  NMR and  $^{13}\text{C}$  NMR spectra were recorded by a Bruker Avance III 600 spectrometer operating at 600 MHz (150 MHz for  $^{13}\text{C}$  NMR) at 25 °C with tetramethylsilane ( $\delta = 0.0$  ppm) as an internal standard. The data are reported as follows: chemical shift in ppm ( $\delta$ ), multiplicity (s = singlet, d = doublet, t = triplet, q = quartet, m = multiplet), integration, and coupling constant (Hz).  $^{31}\text{P}$  NMR spectra were recorded with 85%  $\text{H}_3\text{PO}_4$  ( $\delta = 0.0$  ppm) as an external standard. High resolution mass spectra were measured with a JEOL JMS-3000. Analytical thin-layer chromatography (TLC) was performed on MERCK silica gel, grade 60 F<sub>254</sub>. The spots and bands were detected by UV light of irradiation (254 nm) and/or by staining with 5% phosphomolybdic acid followed by heating. Column chromatography for isolation of the products was carried out on KANTO Sillica Gel 60 (230-400 mesh). HPLC analyses were performed using Interigent UV/VIS Detector JASCO UV-7500. The chiral columns included CHIRALCEL OD-H and CHIRALPAK AD-H (Daicel Chemical Industries, Ltd., 0.46  $\Phi \times 25$  cm).

**Materials** Aldimines **3a–o** were prepared by using reported methods.<sup>1</sup> Allenates **4b–d** were prepared from the appropriate phosphorane according to the literature.<sup>2</sup> Commercially available reagents were used throughout without purification unless otherwise stated. Catalysts (*S<sub>p</sub>*)-**1a**<sup>3</sup> and **1b**<sup>4</sup> were prepared using reported method in our previous paper.

## (2) Effects of the substituent on the imine nitrogen atom.<sup>a</sup>

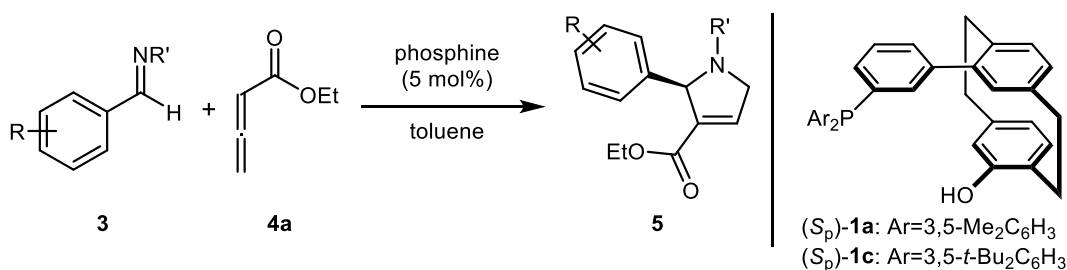

| Entry | R    | R'                     | Phosphine                           | Temp.  | <i>t</i> | Yield (%) <sup>b</sup> | Ee (%) <sup>c</sup> |
|-------|------|------------------------|-------------------------------------|--------|----------|------------------------|---------------------|
| 1     | 4-Cl | Ts                     | ( <i>S<sub>p</sub></i> )- <b>1a</b> | rt     | 25 min   | 96                     | 40                  |
| 2     | 4-Cl | Ms                     | ( <i>S<sub>p</sub></i> )- <b>1a</b> | rt     | 40 min   | 95                     | 37                  |
| 3     | 4-Cl | 2-Naphthalene-sulfonyl | ( <i>S<sub>p</sub></i> )- <b>1a</b> | rt     | 20 min   | 90                     | 39                  |
| 4     | 4-Cl | DPP                    | ( <i>S<sub>p</sub></i> )- <b>1a</b> | rt     | 48 h     | 10                     | 37                  |
| 5     | 4-Cl | Ts                     | ( <i>S<sub>p</sub></i> )- <b>1c</b> | -30 °C | 7 h      | 99                     | 80                  |
| 6     | 4-Cl | Ms                     | ( <i>S<sub>p</sub></i> )- <b>1c</b> | -30 °C | 6 h      | 88                     | 78                  |
| 7     | 4-Cl | 2-Naphthalene-sulfonyl | ( <i>S<sub>p</sub></i> )- <b>1c</b> | -30 °C | 6 h      | 99                     | 73                  |

<sup>a</sup> Reaction conditions: **3** (0.05 mmol), **4a** (0.11 mmol), catalyst ( $2.5 \times 10^{-3}$  mmol) in toluene (0.5 mL) at room temperature.

<sup>b</sup> Isolated yield. <sup>c</sup> Determined by HPLC analysis using a chiral stationary phase.

## (3) Preparation of catalyst (*S<sub>p</sub>*)-1c

### 1-Bromo-3-[bis(3,5-di-*tert*-butyl)phosphino]benzene (**S3**)

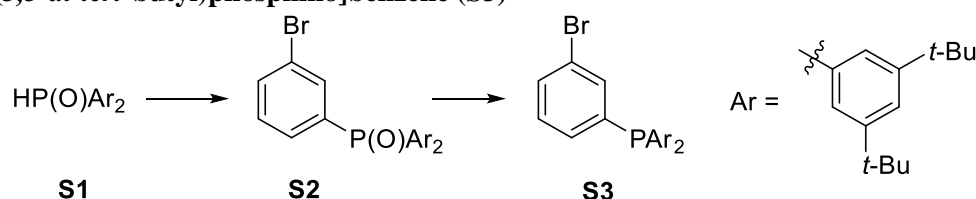

This reaction was carried out under Ar. To a solution of phosphine oxide **S1**<sup>5</sup> (2.03 g, 4.76 mmol), DPPP (176 mg, 0.426 mmol) and Pd(OAc)<sub>2</sub> (107 mg, 0.475 mmol) in DMSO (54.2 mL) were added 3-bromoiodobenzene (0.55 mL, 4.33 mL) and *i*-Pr<sub>2</sub>NEt (2.28 mL, 13.1 mmol). After being stirred for 10 h at 100 °C, the reaction mixture was quenched with 10% aqueous HCl (26.7 mL), and extracted with EtOAc (50 mL x 3). The combined extracts were washed with water (100 mL) and brine (100 mL), dried over Na<sub>2</sub>SO<sub>4</sub> and concentrated to dryness. The residue was purified by column chromatography (EtOAc/hexane, 5:1) on silica gel to provide 1.73 g (65%) of **S2** as a yellow oil.

To a cooled (0 °C) stirred solution of the phosphine oxide **S2** (1.73 g, 2.97 mmol) in toluene (26 mL) were added HSiCl<sub>3</sub> (3.0 mL, 30 mmol) and *i*-Pr<sub>2</sub>NEt (10 mL, 57 mmol). After being stirred for 2 h at 80 °C, the mixture was quenched with 25% aqueous NaOH (70 mL). The precipitated solids were removed by filtration through a pad of Celite and washed well with EtOAc. The filtrate was extracted with EtOAc (30 mL × 3). The combined extracts were washed with water (100 mL) and saturated brine (100 mL), respectively. The organic layer was dried over Na<sub>2</sub>SO<sub>4</sub> and concentrated under reduced pressure. The residue was purified by column chromatography on silica gel (eluent: hexane only) to provide 1.44 g (86%) of **S3** as a colorless oil: <sup>1</sup>H NMR (600 MHz, CDCl<sub>3</sub>): δ 1.25 (s, 36H), 7.14 (d, 2H, *J* = 1.8 Hz), 7.15 (d, 2H, *J* = 1.8 Hz), 7.16-7.21 (m, 2H), 7.39-7.41 (m, 2H), 7.42 (dt, 1H, *J* = 5.4, 1.8 Hz), 7.46 (dt, 1H, *J* = 6.6, 1.8 Hz); <sup>13</sup>C NMR (150 MHz, CDCl<sub>3</sub>): δ 31.4 (12C), 34.9 (4C), 122.7, 122.9 (4C), 128.2 (d, 4C, *J*<sub>c-p</sub> = 21.0 Hz), 129.7 (d, *J*<sub>c-p</sub> = 21.0 Hz), 131.2 (2C), 131.8 (d, *J*<sub>c-p</sub> = 18.0 Hz), 135.4 (d, *J*<sub>c-p</sub> = 9.0 Hz), 135.9 (d, *J*<sub>c-p</sub> = 19.5 Hz), 142.0 (d, *J*<sub>c-p</sub> = 16.5 Hz), 150.8 (d, 2C, *J*<sub>c-p</sub> = 6.0 Hz). HRMS (MALDI) calcd for C<sub>34</sub>H<sub>47</sub>PBr [*M*+H]<sup>+</sup>: 565.2593, found: 565.2611.

### Catalyst (*S<sub>p</sub>*)-1c

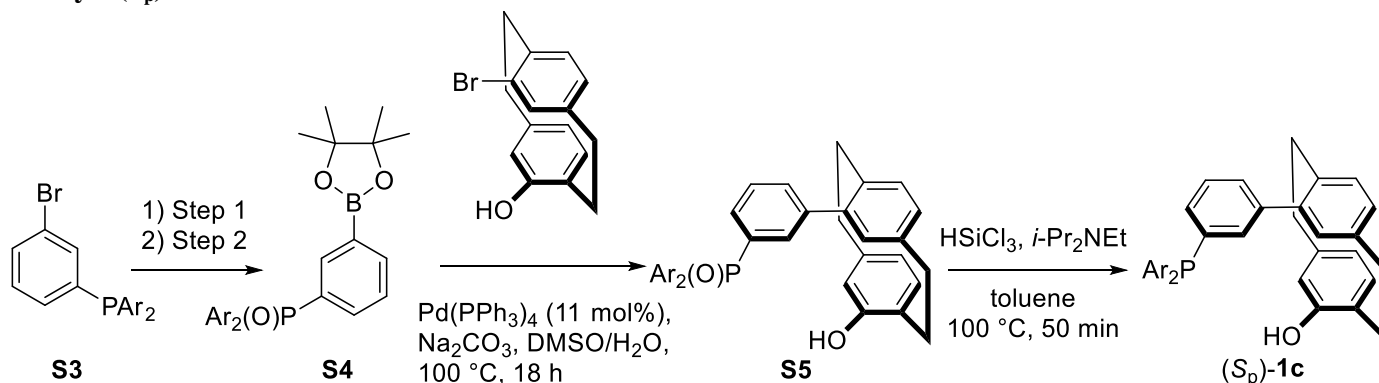

Procedure for preparation of **S4** from **S3**: The following reaction was carried out under Ar. (**Step 1**) To a cooled (−78 °C) solution of **S3** (200 mg, 0.354 mmol) in THF (2.1 mL) was slowly added *n*-BuLi (0.29 mL, 0.46 mmol, 1.6 M in hexane solution). After stirring for 30 min at −78 °C, 2-isopropoxy-4,4,5,5-tetramethyl-1,3,2-dioxaborolane (0.22 mL, 1.1 mmol) was added to the mixture at that temperature. Then the reaction mixture was stirred for 14.3 h at room temperature, quenched with water, and extracted with CH<sub>2</sub>Cl<sub>2</sub> (15 mL × 4). The combined extracts were washed with water (30 mL) and brine (30 mL), dried over Na<sub>2</sub>SO<sub>4</sub> and concentrated to dryness. The residue was purified by column chromatography (EtOAc/hexane, 1:80) on silica gel to provide 100.5 mg (46%) of borylated compound as white solids.

(**Step 2**) A stirred solution of the compound obtained in **step 1** (135 mg, 0.221 mmol), FeCl<sub>3</sub>·6H<sub>2</sub>O (6.0 mg, 0.022 mmol), KSCN (10.8 mg, 0.111 mmol) and I<sub>2</sub> (cat. amount) in dry MeCN (2.4 mL) was heated at 80 °C with vigorous O<sub>2</sub> bubbling. After being stirred for 1 h at 80 °C, the mixture was cooled to room temperature, and concentrated under reduced pressure. The residue was extracted with EtOAc (40 mL × 3). The combined extracts were washed with saturated aqueous Na<sub>2</sub>S<sub>2</sub>O<sub>3</sub> (30 mL), water (30 mL) and brine (30 mL), dried over Na<sub>2</sub>SO<sub>4</sub> and concentrated to provide 140.9 mg (quant.) of **S4** as light green solids.

Procedure for preparation of (*S<sub>p</sub>*)-1c: To a solution of **S4** (126 mg, 0.200 mmol) in DMSO (3.0 mL) and H<sub>2</sub>O (0.3 mL) were added (*S<sub>p</sub>*)-12-bromo[2.2]paracyclophan-4-ol (60.6 mg, 0.200 mmol), Na<sub>2</sub>CO<sub>3</sub> (63.6 mg, 0.600 mmol) and Pd(PPh<sub>3</sub>)<sub>4</sub> (26.3 mg, 0.0228 mmol, 11 mol%). After being stirred for 18 h at 100 °C, the mixture was diluted with water and extracted with EtOAc (30 mL × 2). The combined extracts were washed with saturated brine (30 mL), dried over Na<sub>2</sub>SO<sub>4</sub> and concentrated under reduced pressure. The residue was purified by column chromatography on silica gel (CH<sub>2</sub>Cl<sub>2</sub>/EtOAc/hexane, 2:1:4) to provide **S5** (116 mg, 80%) as yellow solids. To a solution of **S5** (114 mg, 0.157 mmol) in toluene (1.4 mL) were added HSiCl<sub>3</sub> (0.16 mL, 1.6 mmol) and *i*-Pr<sub>2</sub>NEt (0.55 mL, 3.2 mmol) at 0 °C. After being stirred for 50 min at 100 °C, the reaction mixture was quenched with saturated aqueous NaHCO<sub>3</sub> (9 mL) and extracted with EtOAc (40 mL × 2). The combined extracts were washed with saturated brine (40 mL), dried over Na<sub>2</sub>SO<sub>4</sub> and concentrated under reduced pressure. The residue was purified by column chromatography on silica gel (EtOAc/hexane, 1:20) to provide 70.8 mg (63%) of (*S<sub>p</sub>*)-1c as colorless solids: mp 163-164 °C; [α]<sub>D</sub><sup>25</sup> = +7.85 (*c* = 0.46 in CHCl<sub>3</sub>); <sup>1</sup>H NMR (600 MHz, CDCl<sub>3</sub>): δ 1.24 (s, 18H), 1.26 (s, 18H), 2.26 (m, 1H), 2.56 (m, 1H), 2.70-2.92 (m, 2H), 2.85-2.95 (m, 2H), 3.03 (t, 1H, *J* = 11.4 Hz), 3.25-3.39 (m, 2H), 5.13 (d, 1H, *J* = 1.2 Hz), 6.18 (dd, 1H, *J* = 7.8, 1.2 Hz), 6.37 (dd, 1H, *J* = 7.8, 1.2 Hz), 6.40 (d, 1H, *J* = 7.8 Hz), 6.60 (d, 1H, *J* = 7.8 Hz), 6.78 (d, 1H, *J* = 1.8 Hz), 7.10 (d, 1H, *J* = 5.4 Hz), 7.20-7.25 (m, 4H), 7.34 (d, 1H, *J* = 7.8 Hz), 7.38 (td, 1H, *J* = 7.8, 1.8 Hz), 7.41-7.50 (m, 2H), 7.54 (m, 1H); <sup>13</sup>C NMR (150 MHz, CDCl<sub>3</sub>): δ 31.1, 31.4 (6C), 31.5 (6C), 33.1, 33.9, 34.2, 34.9 (2C), 35.0 (2C), 118.0, 123.0 (d, *J*<sub>c-p</sub> = 18.0 Hz), 124.5, 125.4, 128.1, 128.2, 128.3, 130.8, 132.2, 132.5, 132.7 (d, *J*<sub>c-p</sub> = 4.5 Hz), 135.1, 135.3, 135.8 (d, *J*<sub>c-p</sub> = 9.0 Hz), 136.1, 136.8 (d, *J*<sub>c-p</sub> = 9.0 Hz), 138.9 (d, *J*<sub>c-p</sub> = 12.0 Hz), 140.0, 141.2, 141.3,

141.7, 151.0 (d,  $J_{c-p} = 7.5$  Hz), 153.1;  $^{31}\text{P}$  NMR (242 MHz,  $\text{CDCl}_3$ ):  $\delta -3.21$ . HRMS (MALDI) calcd for  $\text{C}_{50}\text{H}_{62}\text{OP}$   $[M+H]^+$ : 709.4528, found: 709.4533.

#### (4) Determination of the absolute configuration for **5j** and **5m**

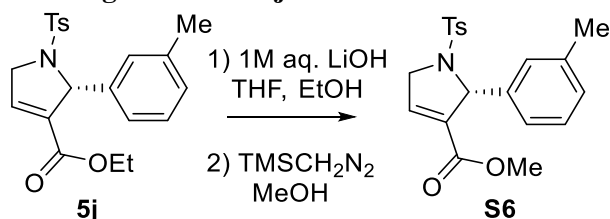

To a cooled ( $0\text{ }^\circ\text{C}$ ) stirred solution of **5j** (18.0 mg, 0.0467 mmol, 84% *ee*) in THF (0.9 mL) and EtOH (0.9 mL) was added 1M aqueous LiOH (0.9 mL) slowly. After being stirred at room temperature for 1.5 h, the mixture was quenched with 2M aqueous HCl (2 mL) and extracted with EtOAc (30 mL  $\times$  3). The combined extracts were washed with saturated brine (20 mL), dried over  $\text{Na}_2\text{SO}_4$  and concentrated under reduced pressure to provide the crude product (18.3 mg), which was used in the next step without further purification. To a cooled ( $0\text{ }^\circ\text{C}$ ) stirred solution of the crude product (13.5 mg) in MeOH (0.5 mL) was added  $\text{TMSCH}_2\text{N}_2$  (0.6 M in hexane) (0.38 mL, 0.23 mmol). After being stirred for 20 min at  $0\text{ }^\circ\text{C}$ , the mixture was concentrated under reduced pressure. The residue was purified by PTLTC (EtOAc/hexane, 1:2) to provide 9.9 mg (70%) of **S6** as a colorless oil:  $[\alpha]_{\text{D}}^{26} = -120$  ( $c = 0.49$  in  $\text{CHCl}_3$ ); {ref. 6 (*S*)-**S6**;  $[\alpha]_{\text{D}}^{26} = -157$  ( $c = 1.02$  in  $\text{CHCl}_3$ ) for 87% *ee*}.  $^1\text{H}$  NMR (600 MHz,  $\text{CDCl}_3$ ):  $\delta$  2.23 (s, 3H), 2.37 (s, 3H), 3.59 (s, 3H), 4.43-4.55 (m, 2H), 5.70 (dt, 1H,  $J = 5.4, 1.8$  Hz), 6.77 (q, 1H,  $J = 1.8$  Hz), 6.90 (s, 1H), 7.03 (d, 2H,  $J = 7.8$  Hz), 7.10-7.15 (m, 3H), 7.60 (d, 2H,  $J = 7.8$  Hz).

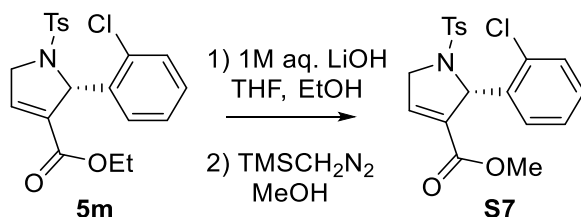

To a cooled ( $0\text{ }^\circ\text{C}$ ) stirred solution of **5m** (15.8 mg, 0.0389 mmol, 90% *ee*) in THF (0.8 mL) and EtOH (0.8 mL) was added 1M aqueous LiOH (0.8 mL) slowly. After being stirred at room temperature for 1.5 h, the mixture was quenched with 2M aqueous HCl (2 mL) and extracted with EtOAc (30 mL  $\times$  3). The combined extracts were washed with saturated brine (20 mL), dried over  $\text{Na}_2\text{SO}_4$  and concentrated under reduced pressure to provide the crude product (18.1 mg), which was used in the next step without further purification. To a cooled ( $0\text{ }^\circ\text{C}$ ) stirred solution of the crude product (18.1 mg) in MeOH (0.5 mL) was added  $\text{TMSCH}_2\text{N}_2$  (0.6 M in hexane) (0.38 mL, 0.23 mmol). After being stirred for 20 min at  $0\text{ }^\circ\text{C}$ , the mixture was concentrated under reduced pressure. The residue was purified by PTLTC (EtOAc/hexane, 1:2) to provide 10.5 mg (68%) of **S7** as a colorless oil:  $[\alpha]_{\text{D}}^{26} = -240$  ( $c = 0.51$  in  $\text{CHCl}_3$ ); {ref. 6 (*S*)-**S7**;  $[\alpha]_{\text{D}}^{26} = -206$  ( $c = 0.98$  in  $\text{CHCl}_3$ ) for 83% *ee*}.  $^1\text{H}$  NMR (600 MHz,  $\text{CDCl}_3$ ):  $\delta$  2.39 (s, 3H), 3.57 (s, 3H), 4.43-4.55 (m, 2H), 6.14 (m, 1H), 6.79 (q, 1H,  $J = 1.8$  Hz), 7.13-7.19 (m, 3H), 7.21 (d, 2H,  $J = 8.4$  Hz), 7.30 (m, 1H), 7.60 (d, 2H,  $J = 8.4$  Hz).

#### References

1. a) D. Huang, X. Wang, X. Wang, W. Chen, X. Wang, Y. Hu, *Org. Lett.* **2016**, *18*, 604. b) S. Morales, F. G. Guijarro, J. L. G. Ruano, M. B. Cid, *J. Am. Chem. Soc.* **2014**, *136*, 1082. c) Z. Li, X. Ren, P. Wei, H. Wan, Y. Shi, P. Ouyang, *Green Chem.* **2006**, *8*, 433. d) J. L. G. Ruano, J. Alemán, M. B. Cid, A. Parrad, *Org. Lett.* **2005**, *7*, 179. e) B. E. Love, P. S. Raje, T. C. Williams II, *Synlett*, **1994**, 493.
2. a) G. Wang, X. Liu, Y. Chen, J. Yang, J. Li, L. Lin, X. Feng, *ACS Catal.* **2016**, *6*, 2482. b) B. J. Cowen, L. B. Saunders, S. J. Miller, *J. Am. Chem. Soc.* **2009**, *131*, 6105. c) C.-Y. Li, X.-B. Wang, X.-L. Sun, Y. Tang, J.-C. Zheng, Z.-H. Xu, Y.-G. Zhou, L.-X. Dai, *J. Am. Chem. Soc.* **2007**, *129*, 1494.
3. S. Kitagaki, Y. Ohta, R. Takahashi, M. Komizu, C. Mukai, *Tetrahedron Lett.* **2013**, *54*, 384.
4. N. Takenaga, S. Adachi, A. Furusawa, K. Nakamura, N. Suzuki, Y. Ohta, M. Komizu, C. Mukai, S. Kitagaki, *Tetrahedron* **2016**, *54*, 384.
5. P. Dotta, A. Magistrato, U. Rothlisberger, P. S. Pregosin, A. Albinati, *Organometallics* **2002**, *21*, 3033.
6. W. Sun, X. Ma, L. Hong, R. Wang, *J. Org. Chem.* **2011**, *76*, 7826.

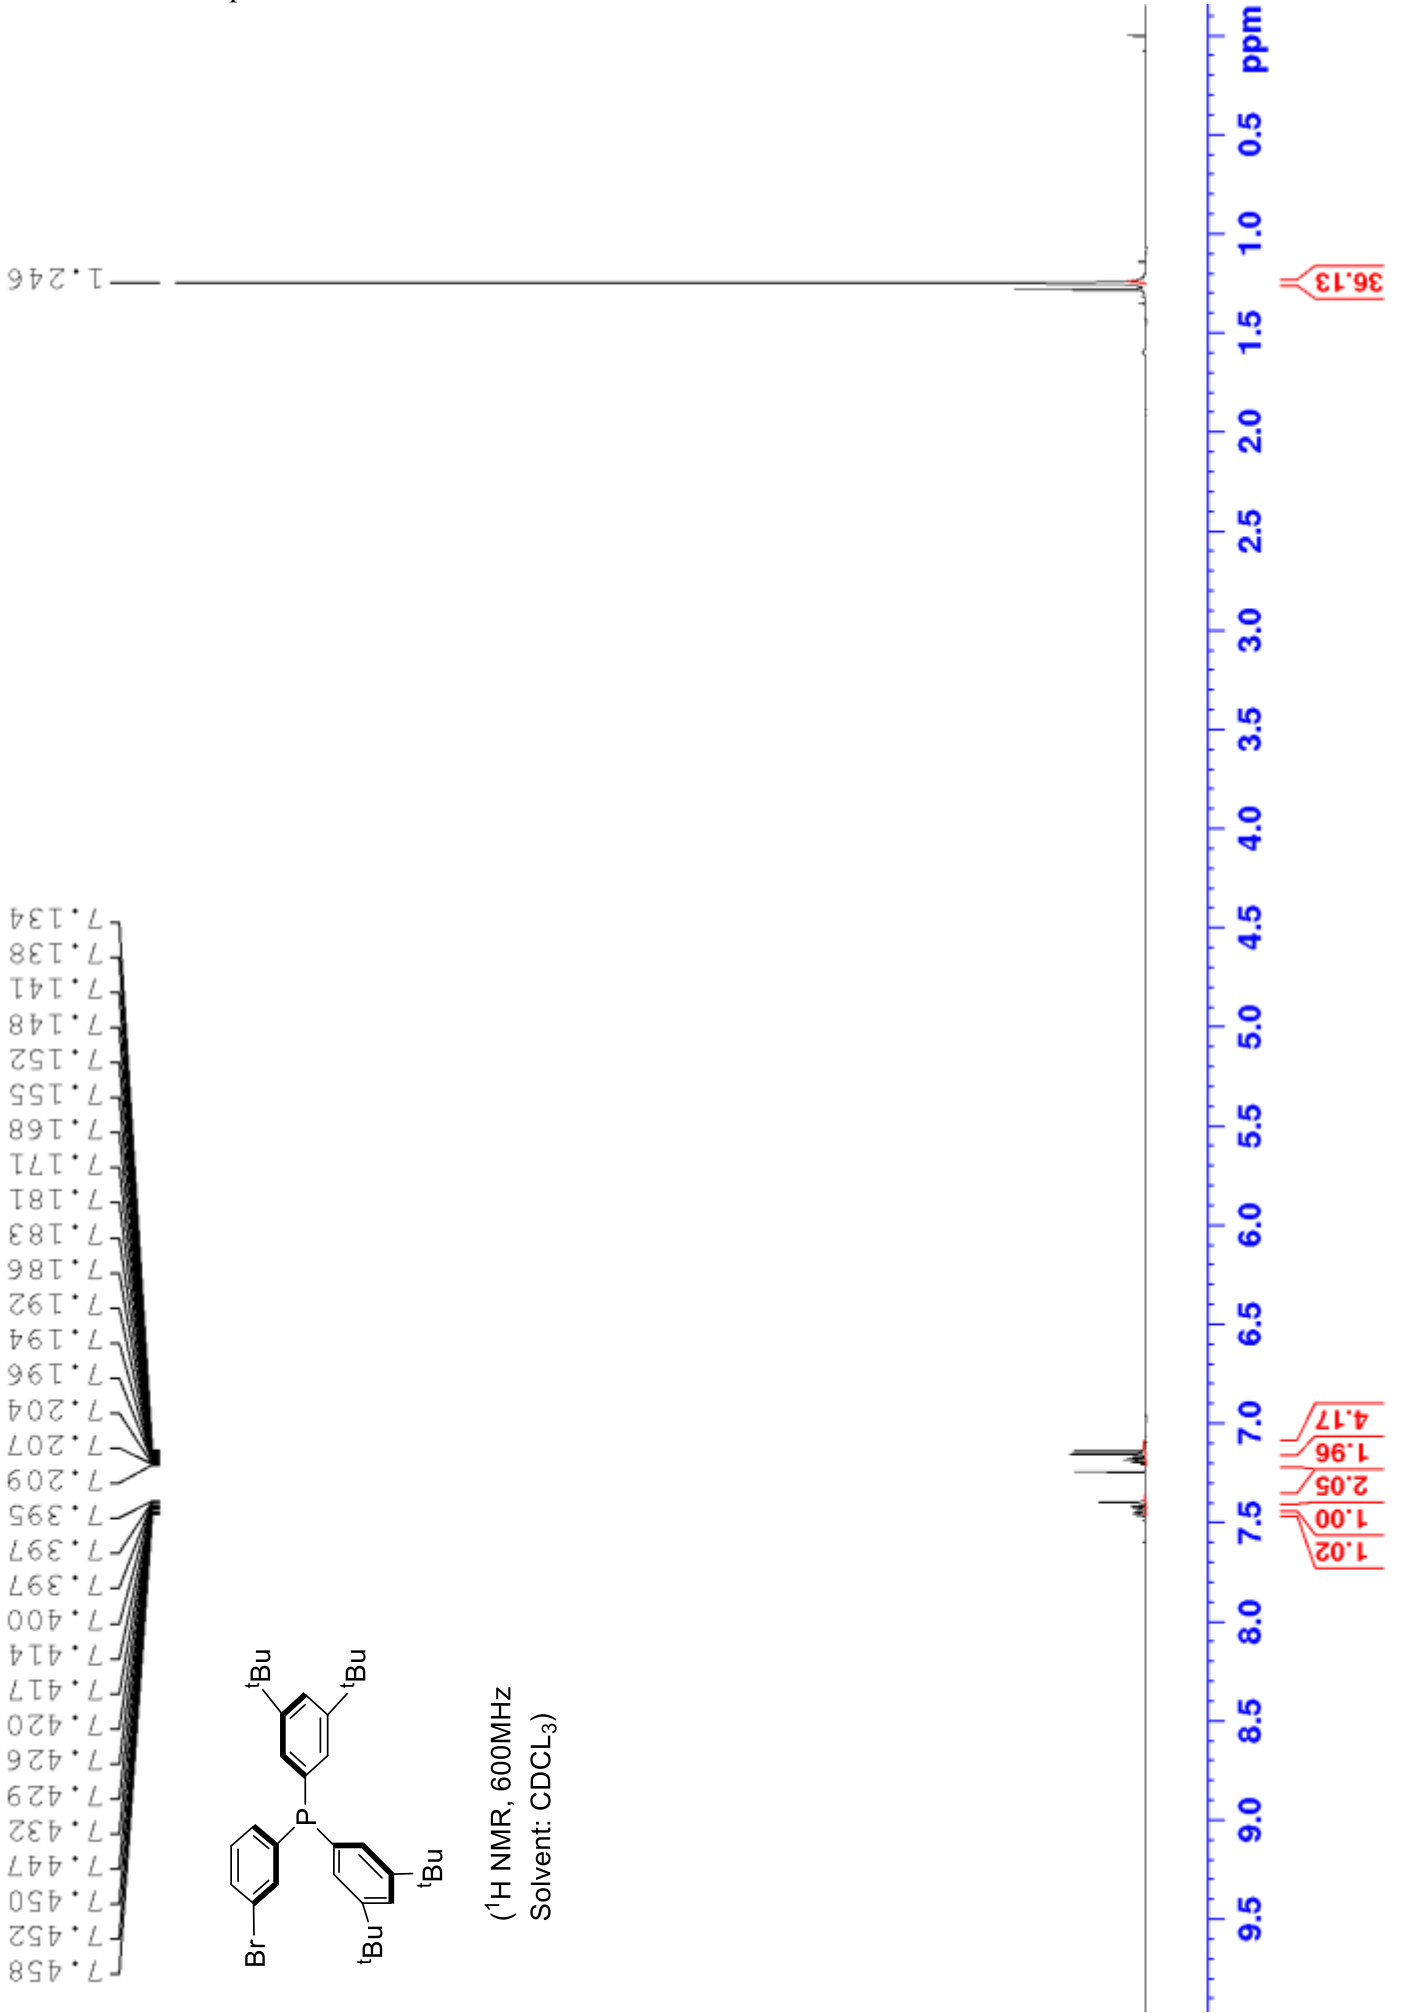

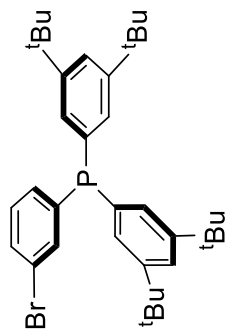

(<sup>13</sup>C NMR, 150MHz  
Solvent: CDCL<sub>3</sub>)

150.78  
150.74  
142.07  
141.96  
135.95  
135.82  
135.43  
135.37  
131.84  
131.72  
131.16  
129.71  
129.67  
128.23  
128.09  
122.93  
122.72  
34.93  
31.39

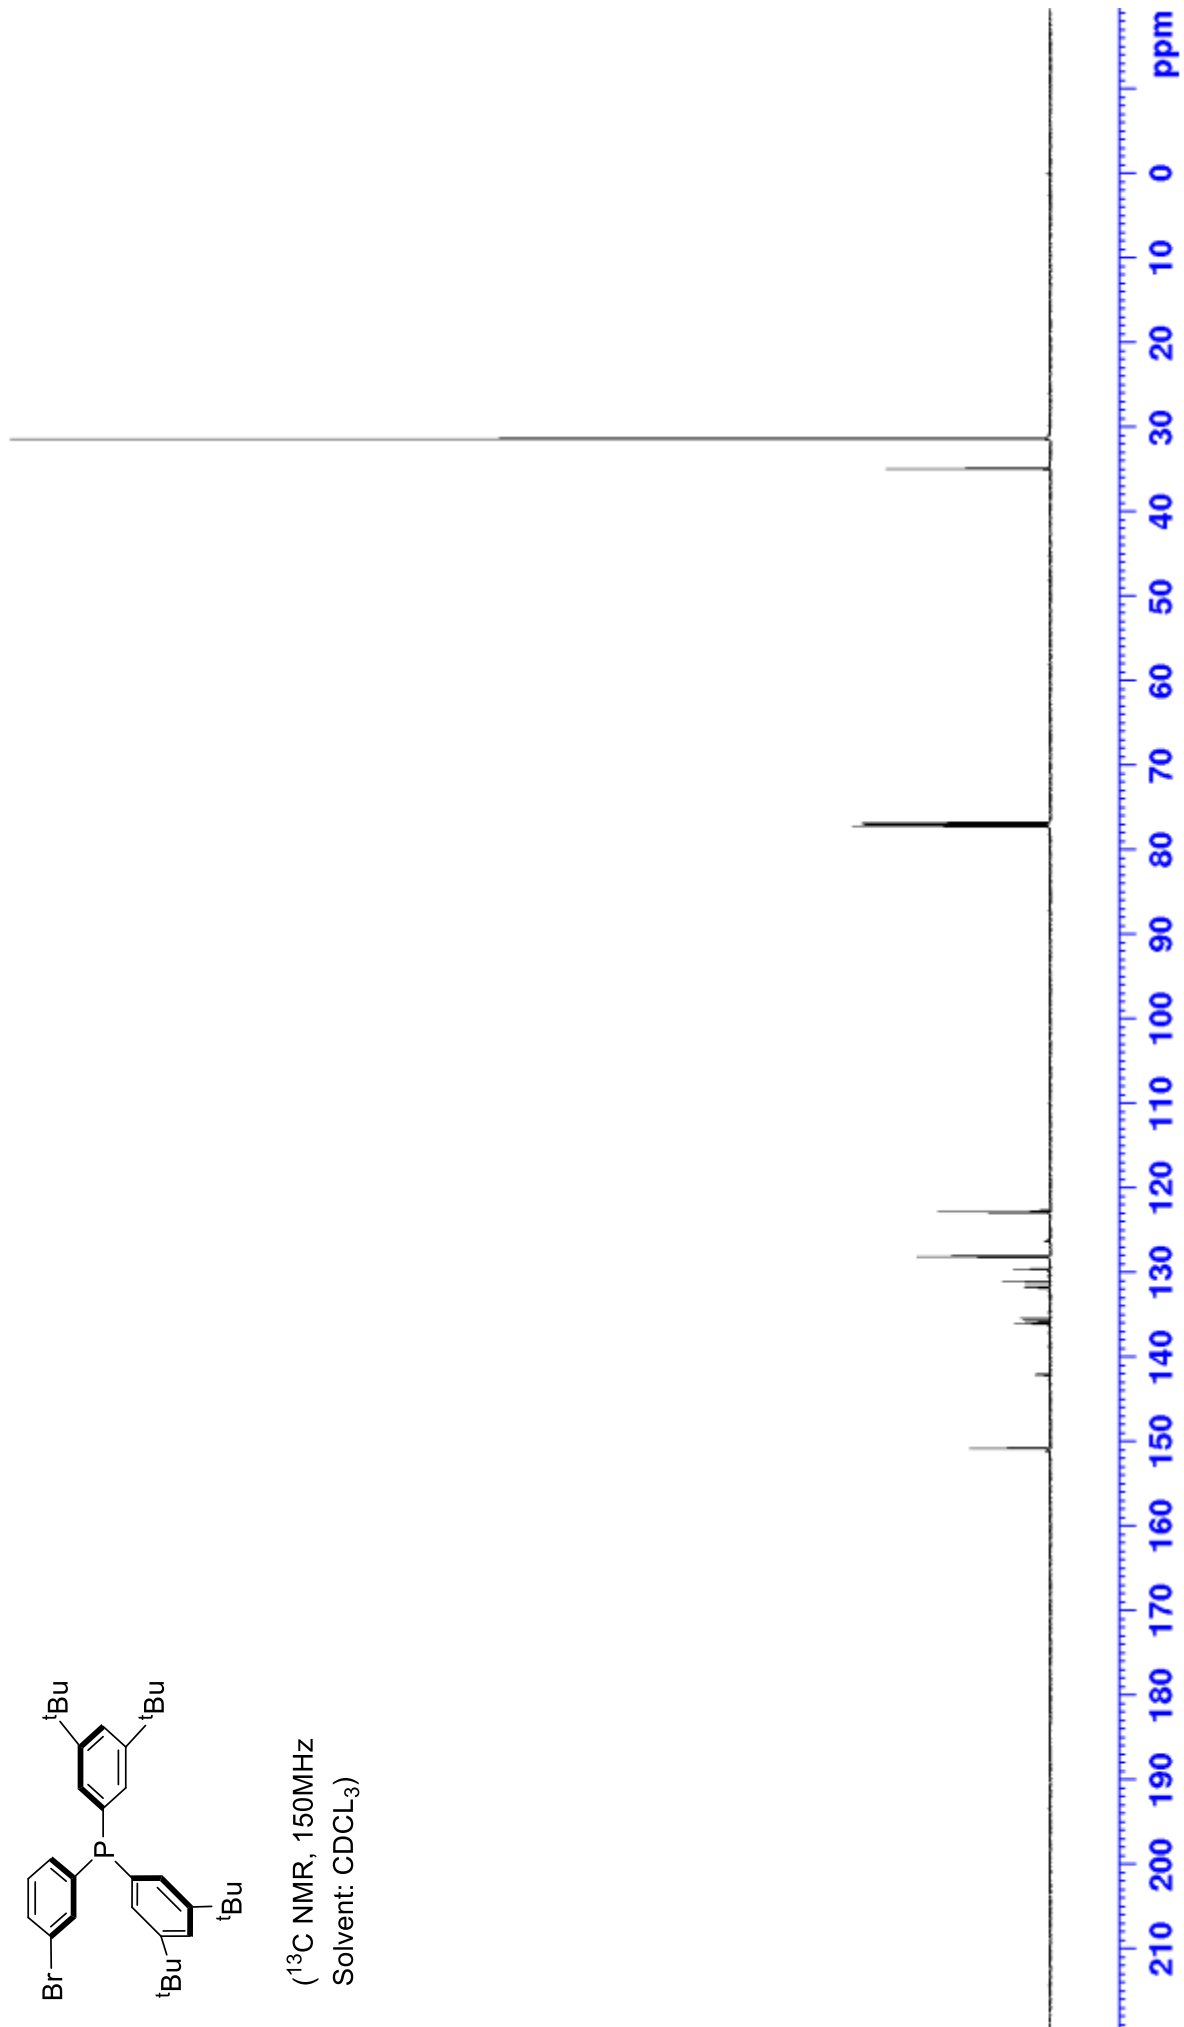

7.547  
 7.535  
 7.532  
 7.519  
 7.455  
 7.452  
 7.449  
 7.417  
 7.414  
 7.411  
 7.400  
 7.396  
 7.387  
 7.384  
 7.375  
 7.371  
 7.348  
 7.335  
 7.244  
 7.241  
 7.234  
 7.230  
 7.227  
 7.221  
 7.218  
 7.109  
 7.100  
 6.786  
 6.783  
 6.600  
 6.587  
 6.404  
 6.391  
 6.381  
 6.379  
 6.368  
 6.366  
 6.188  
 6.186  
 6.176  
 6.173  
 5.146  
 5.143  
 3.369  
 3.276  
 3.273  
 3.027  
 3.009  
 2.910  
 2.902  
 2.896  
 2.763  
 2.754  
 2.739  
 2.723  
 2.263  
 1.260  
 1.243

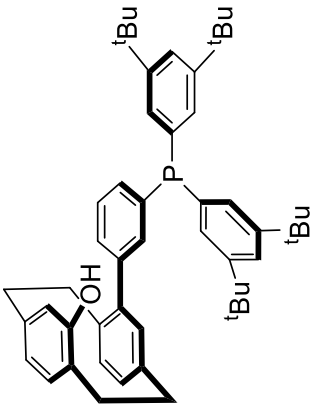

<sup>1</sup>H NMR, 600MHz  
 Solvent: CDCL<sub>3</sub>

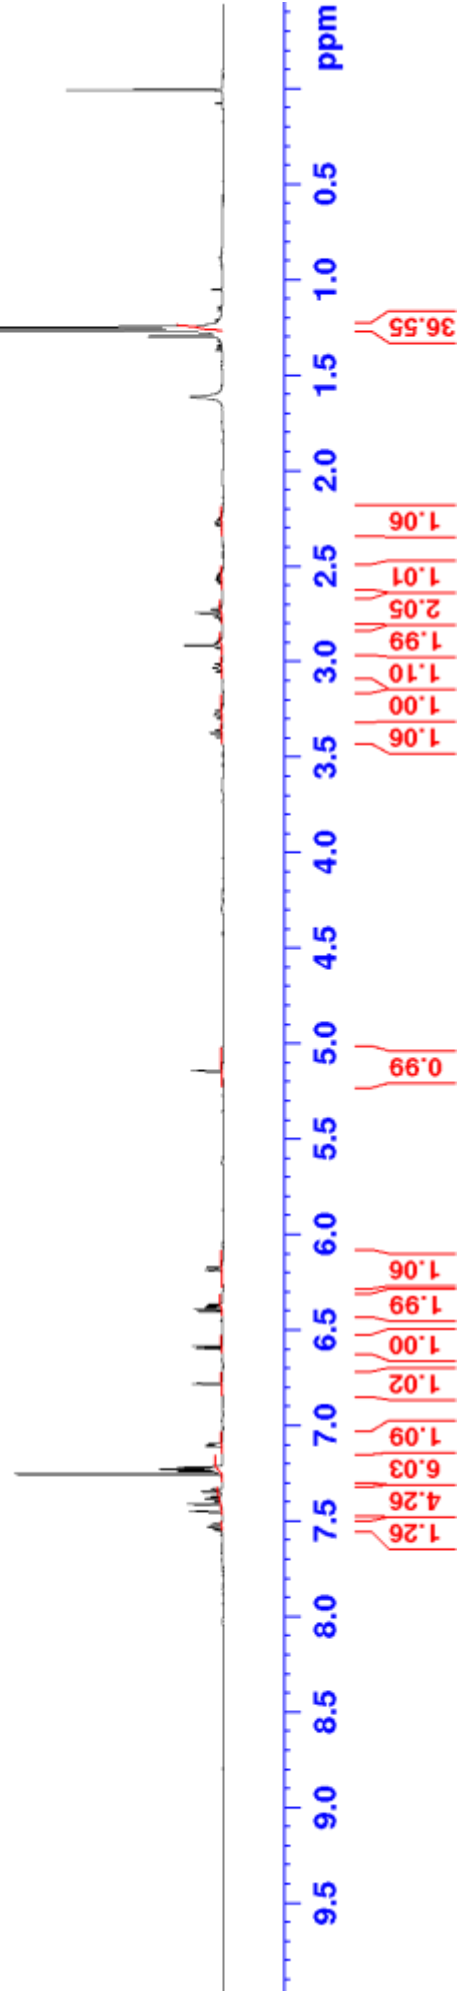

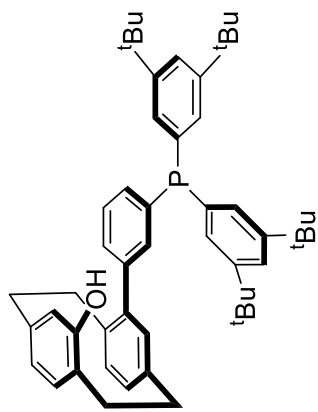

$^{13}\text{C}$  NMR, 150MHz  
Solvent:  $\text{CDCl}_3$

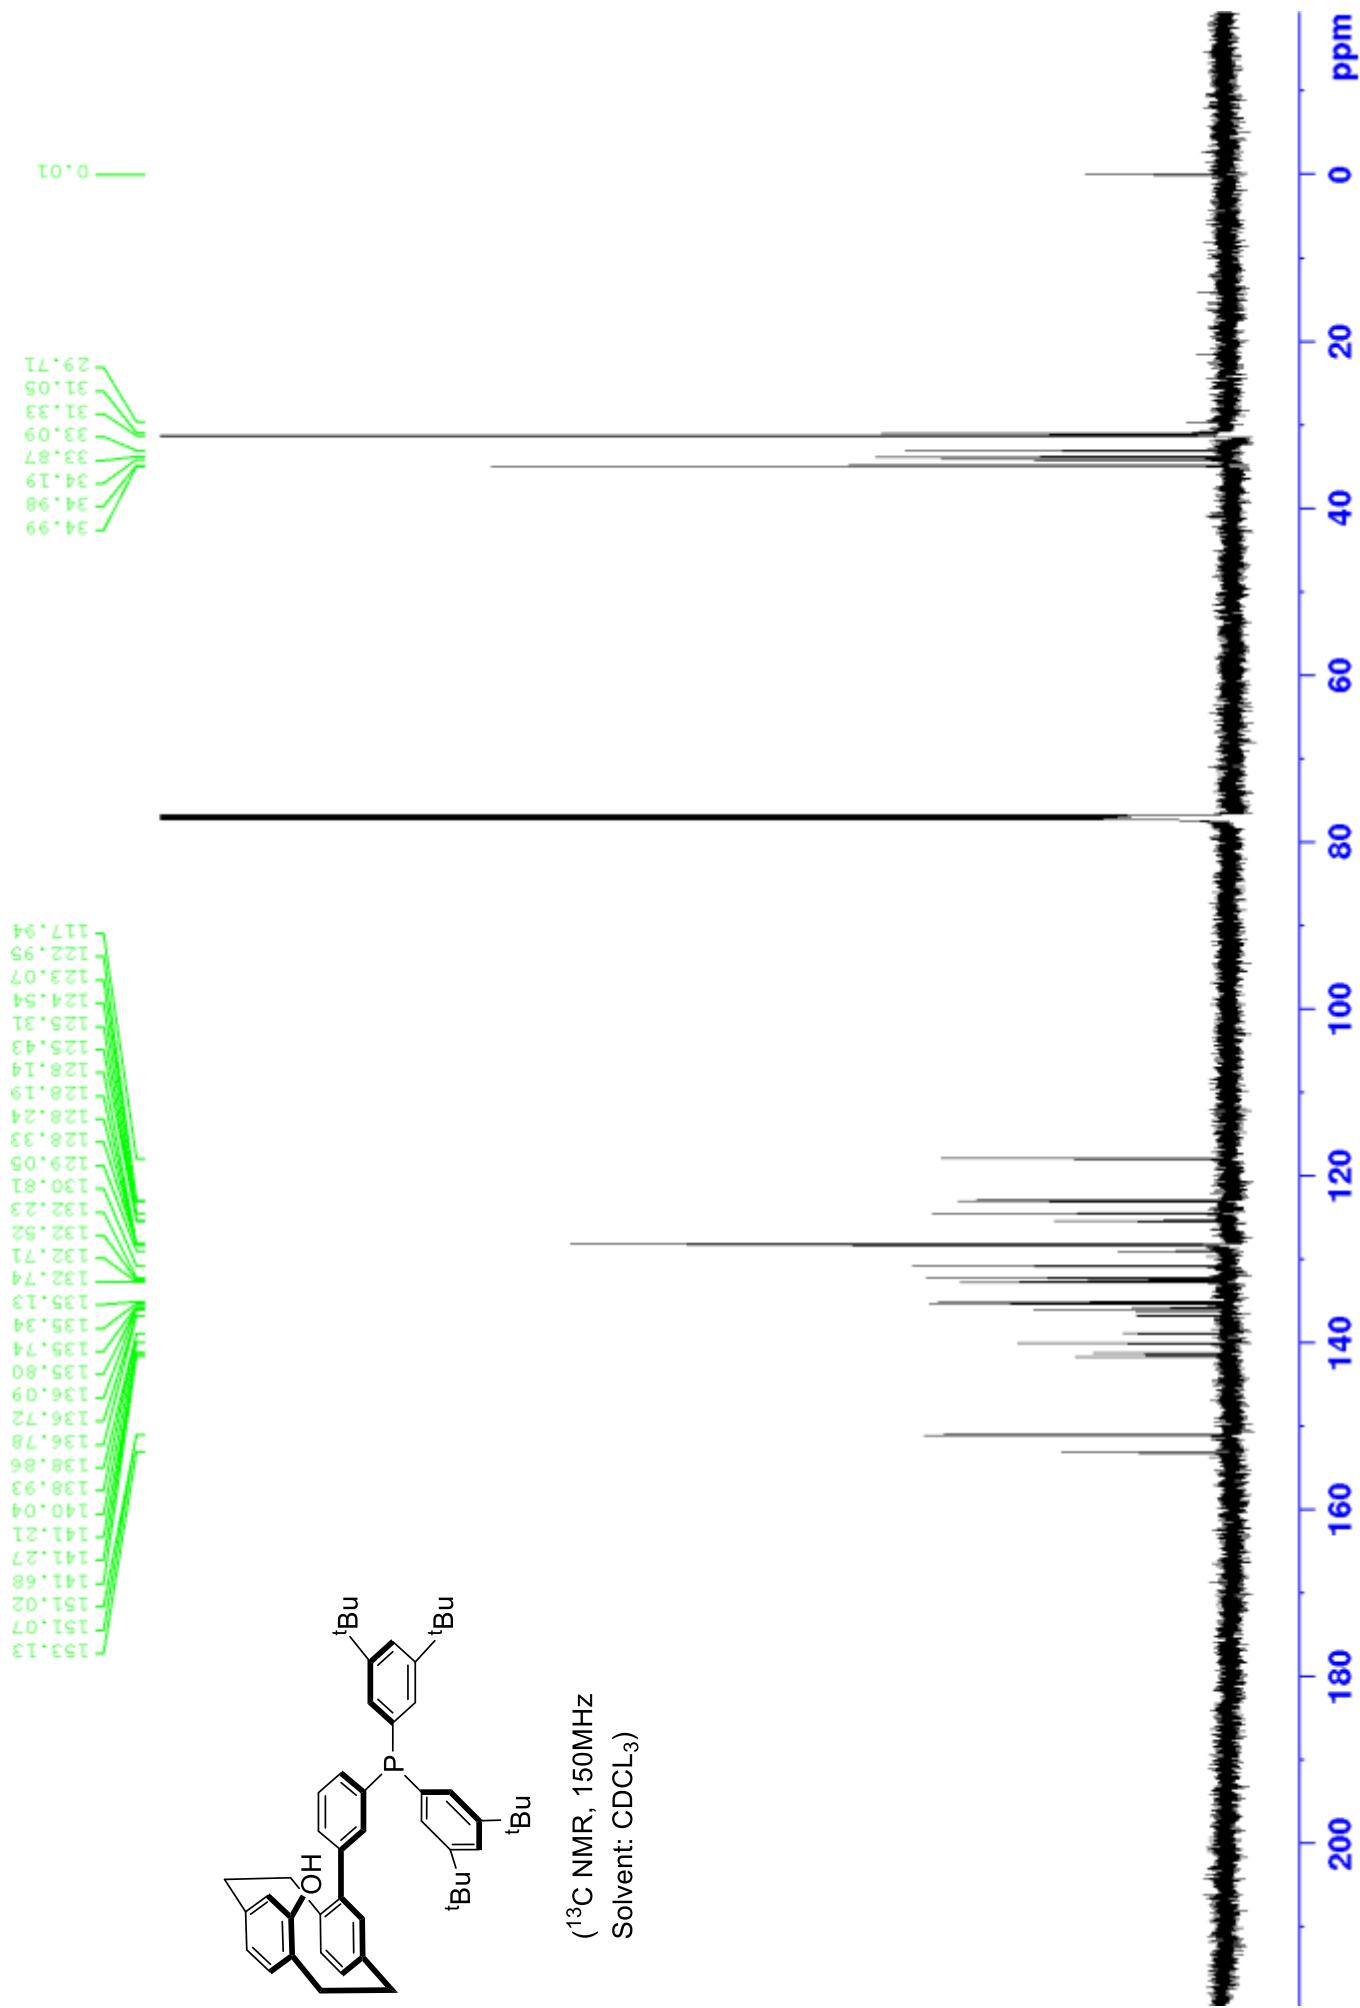



7.427  
 7.424  
 7.416  
 7.413  
 7.348  
 7.346  
 7.345  
 7.343  
 7.335  
 7.333  
 7.332  
 7.330  
 7.227  
 7.225  
 7.223  
 7.214  
 7.212  
 7.210  
 7.170  
 7.167  
 7.164  
 7.156  
 7.134  
 7.121  
 7.108  
 6.810  
 6.806  
 6.803  
 6.800  
 5.673  
 5.670  
 5.666  
 5.663  
 5.660  
 5.657  
 4.554  
 4.550  
 4.530  
 4.526  
 4.522  
 4.432  
 4.429  
 4.422  
 4.419  
 4.403  
 4.086  
 4.074  
 4.068  
 4.056  
 4.026  
 4.014  
 4.008  
 3.996  
 2.386  
 1.138  
 1.127  
 1.115

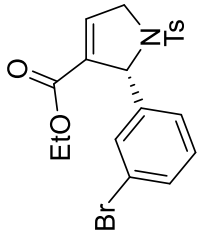

<sup>1</sup>H NMR, 600MHz  
 Solvent: CDCl<sub>3</sub>

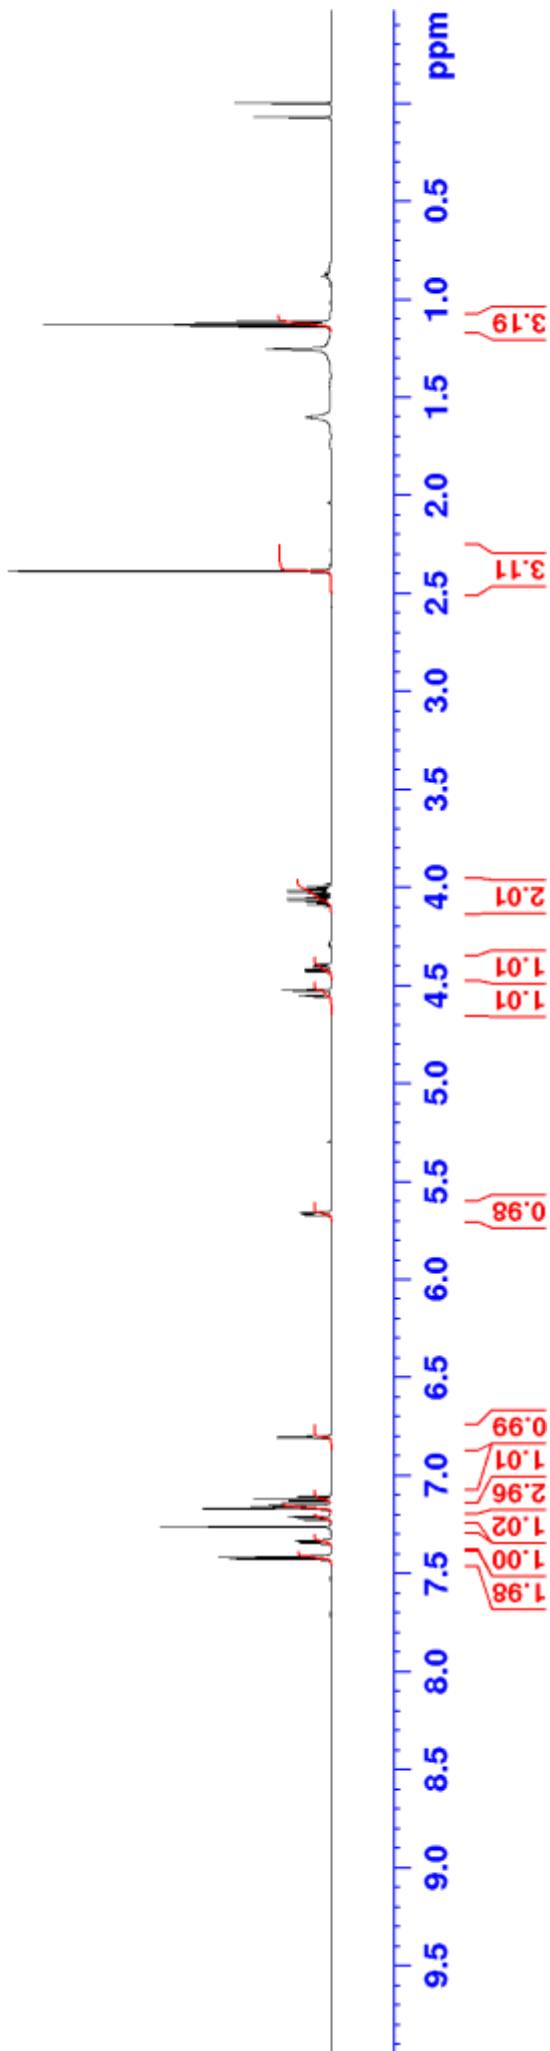

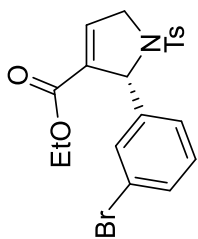

(<sup>13</sup>C NMR, 150MHz  
Solvent: CDCl<sub>3</sub>)

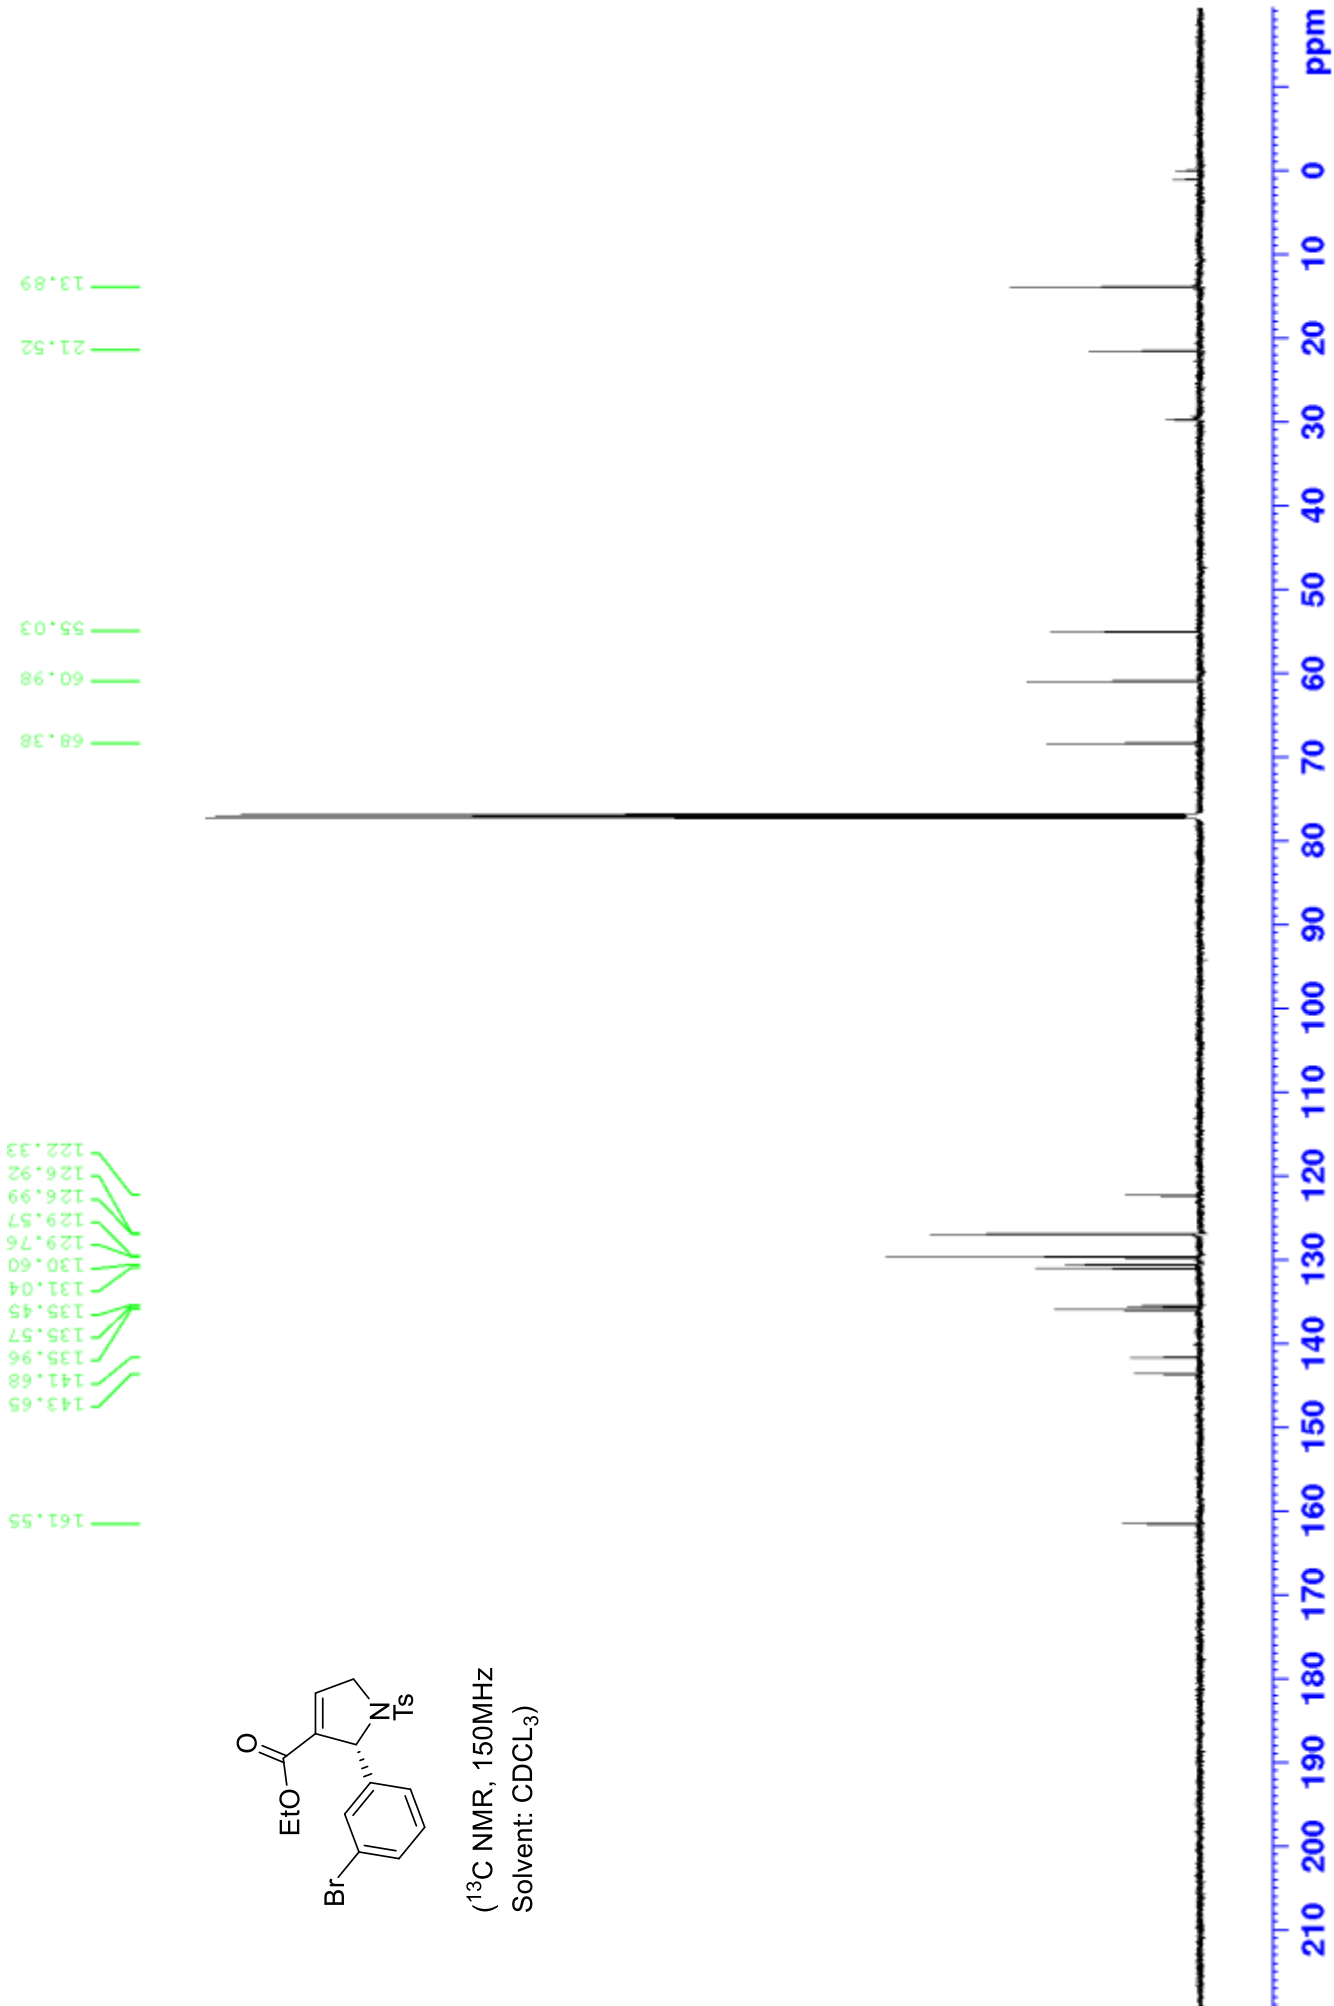

8.109  
 8.107  
 8.105  
 8.104  
 8.095  
 8.094  
 8.092  
 8.090  
 7.937  
 7.934  
 7.931  
 7.706  
 7.704  
 7.702  
 7.694  
 7.691  
 7.689  
 7.491  
 7.489  
 7.483  
 7.481  
 7.478  
 7.474  
 7.470  
 7.457  
 7.194  
 7.193  
 7.180  
 6.860  
 6.856  
 6.853  
 6.849  
 5.777  
 5.774  
 5.771  
 5.768  
 5.766  
 5.763  
 5.760  
 4.546  
 4.543  
 4.540  
 4.537  
 4.535  
 4.531  
 4.079  
 4.067  
 4.061  
 4.049  
 4.028  
 4.016  
 4.010  
 3.998  
 2.372  
 1.140  
 1.129  
 1.117

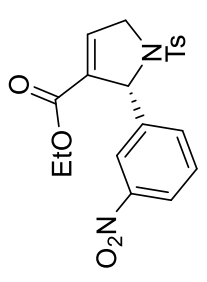

<sup>1</sup>H NMR, 600MHz  
 Solvent: CDCL<sub>3</sub>

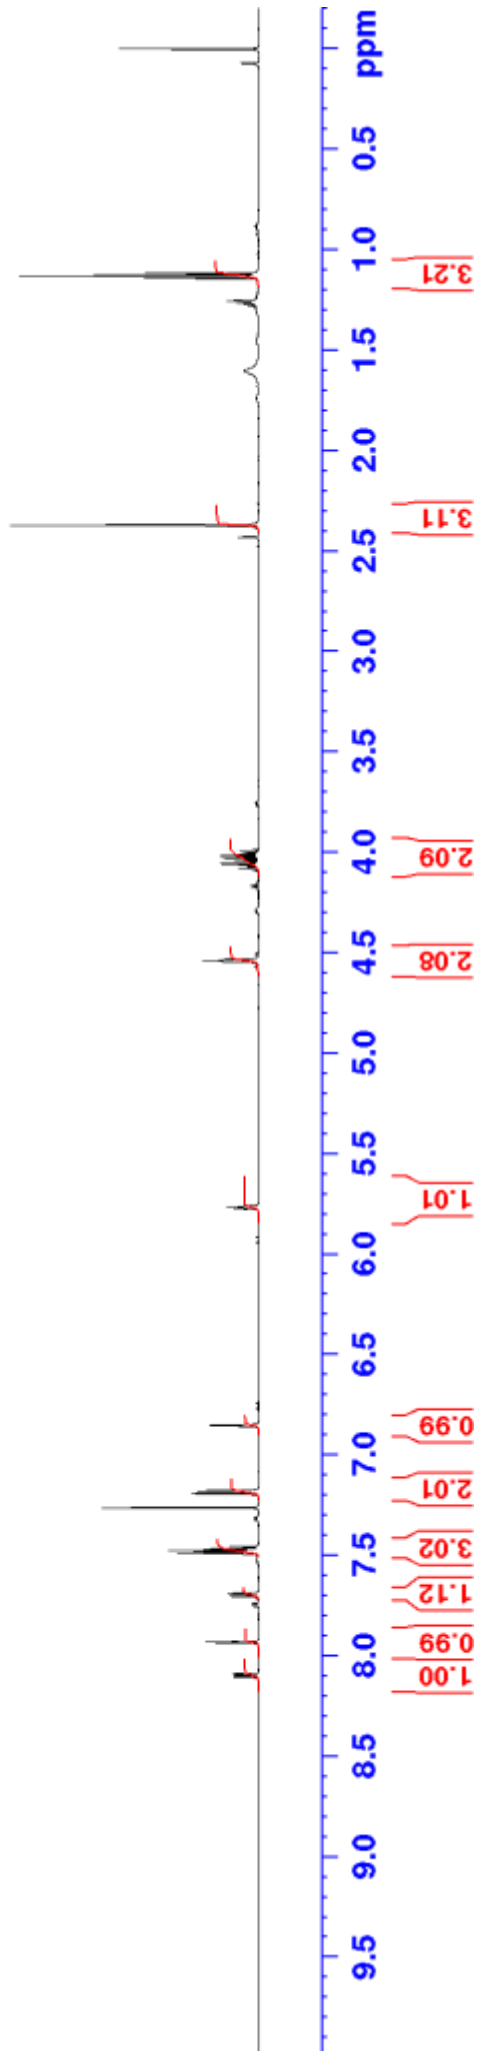

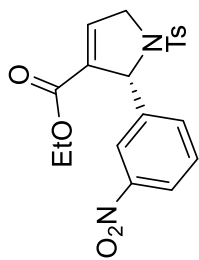

(<sup>13</sup>C NMR, 150MHz  
Solvent: CDCl<sub>3</sub>)

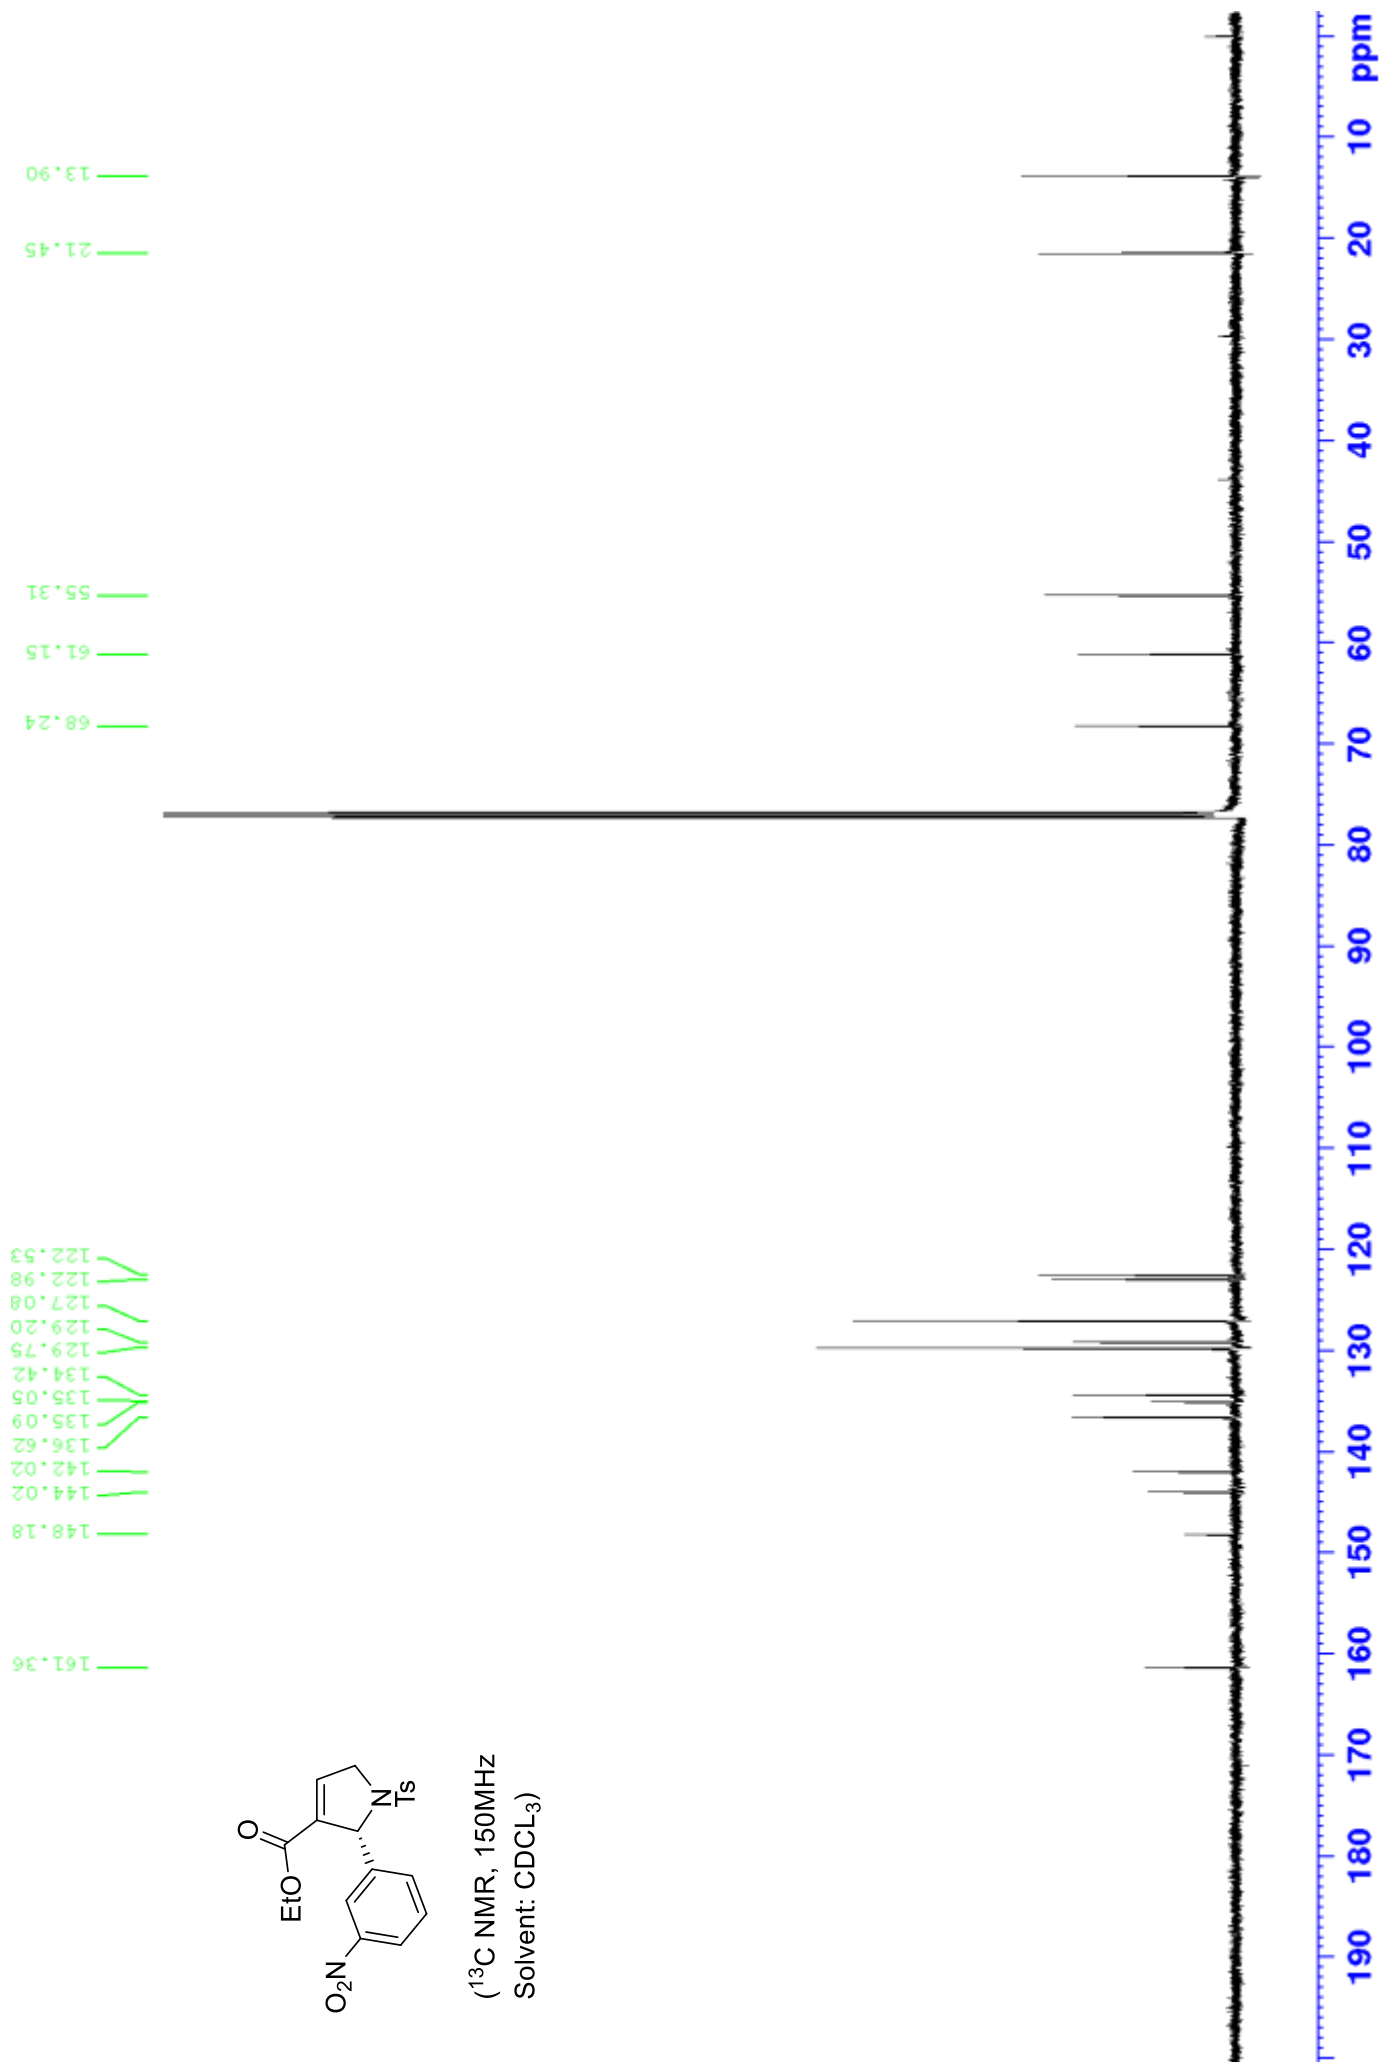

7.400  
 7.387  
 7.131  
 7.117  
 7.104  
 7.033  
 7.031  
 7.028  
 7.027  
 7.021  
 7.018  
 7.016  
 7.014  
 6.902  
 6.776  
 6.772  
 6.769  
 6.766  
 5.702  
 5.699  
 5.696  
 5.692  
 5.689  
 5.686  
 4.537  
 4.533  
 4.529  
 4.509  
 4.505  
 4.501  
 4.403  
 4.400  
 4.393  
 4.390  
 4.375  
 4.372  
 4.365  
 4.362  
 4.080  
 4.068  
 4.062  
 4.056  
 4.050  
 4.045  
 4.038  
 4.026  
 4.025  
 4.013  
 4.006  
 4.001  
 3.995  
 3.989  
 3.983  
 2.218  
 1.120  
 1.108  
 1.097

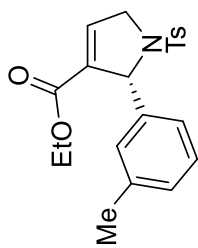

<sup>1</sup>H NMR, 600MHz  
 Solvent: CDCl<sub>3</sub>

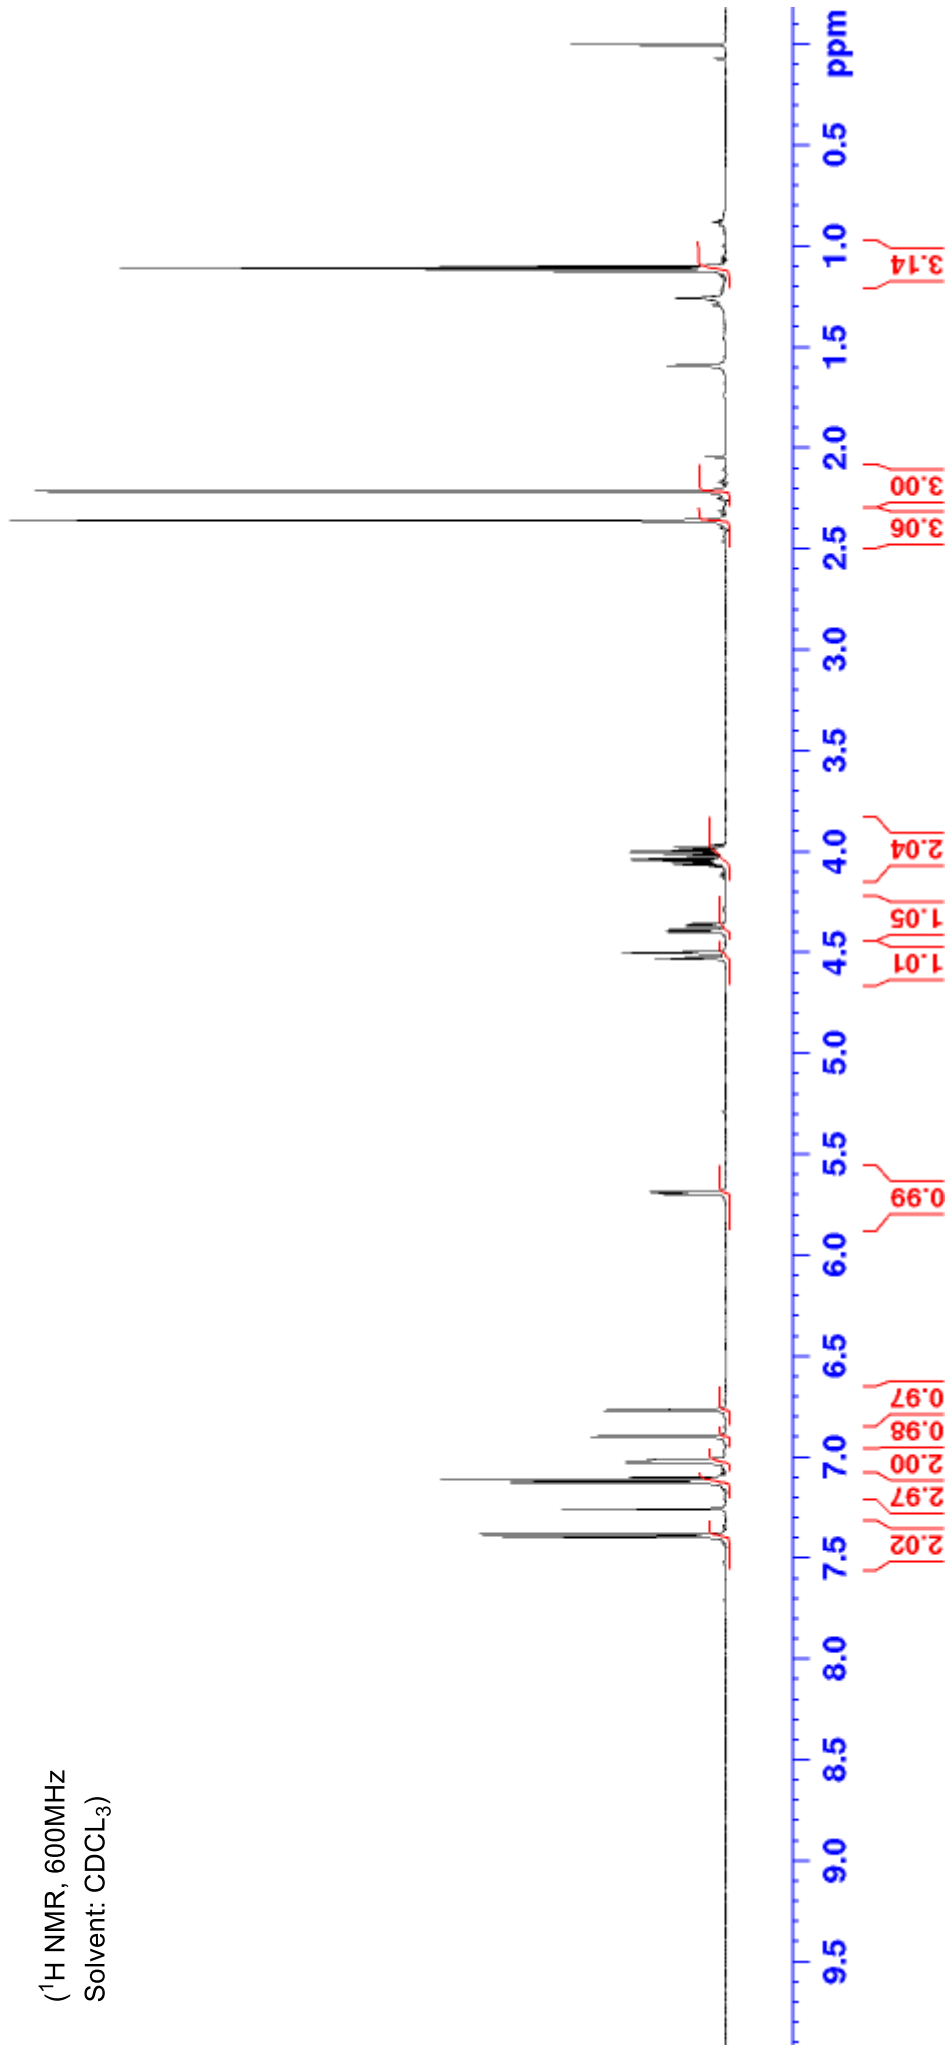

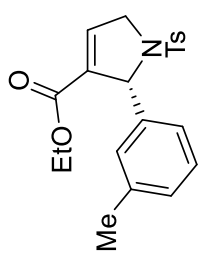

(<sup>13</sup>C NMR, 150MHz  
Solvent: CDCL<sub>3</sub>)

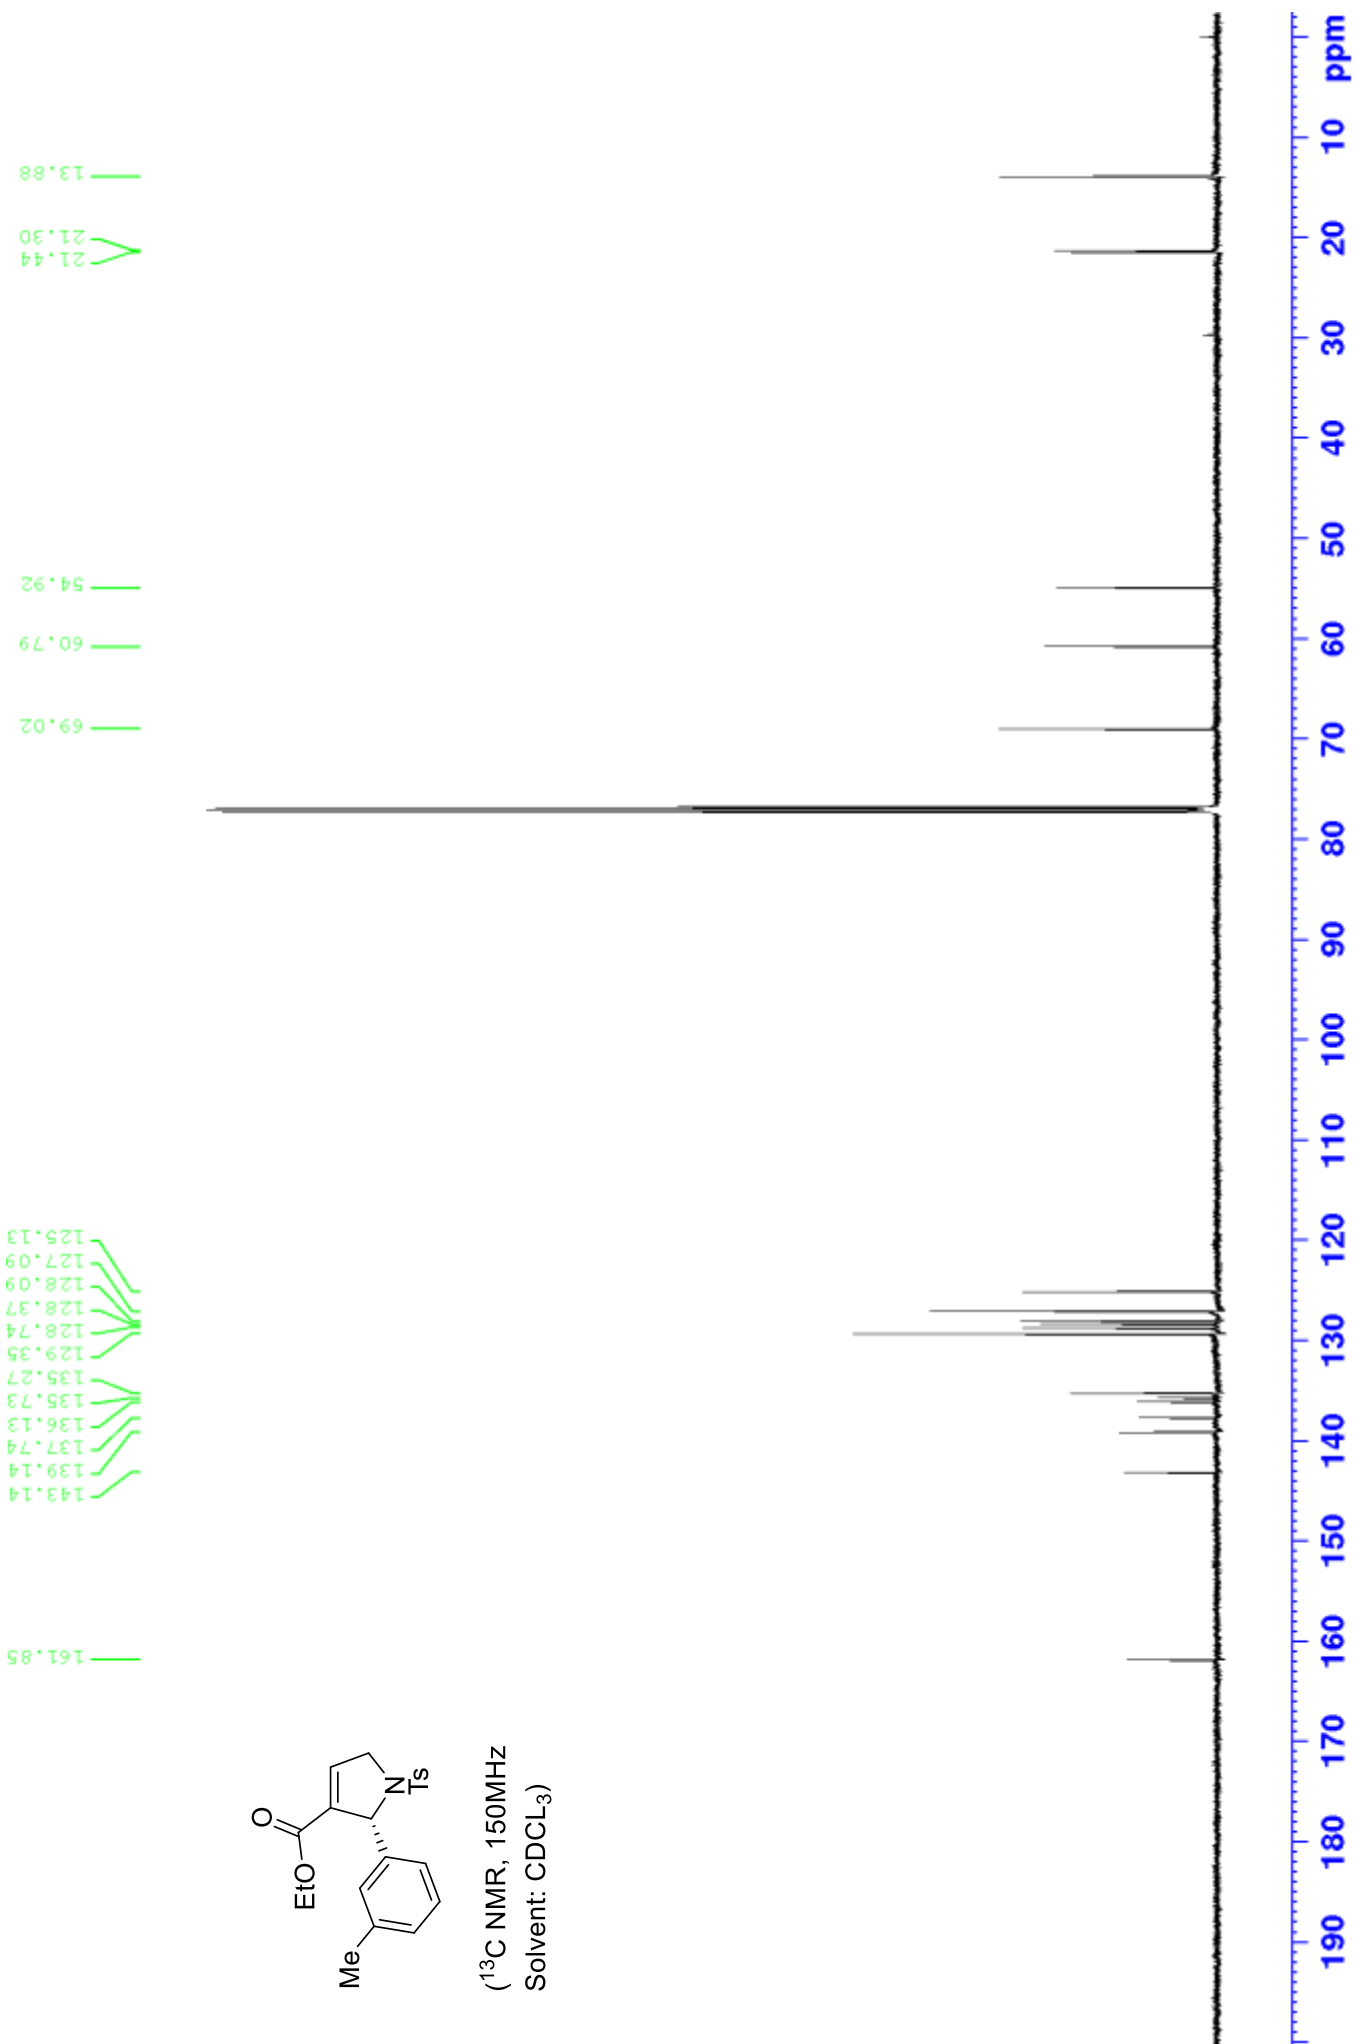

7.782  
 7.776  
 7.772  
 7.766  
 7.719  
 7.713  
 7.709  
 7.703  
 7.671  
 7.657  
 7.630  
 7.628  
 7.456  
 7.451  
 7.451  
 7.446  
 7.446  
 7.441  
 7.361  
 7.359  
 7.350  
 7.348  
 7.270  
 7.267  
 7.256  
 7.253  
 6.953  
 6.940  
 6.848  
 6.845  
 6.841  
 6.838  
 5.905  
 5.902  
 5.899  
 5.896  
 5.892  
 5.889  
 4.609  
 4.585  
 4.581  
 4.577  
 4.501  
 4.498  
 4.491  
 4.488  
 4.011  
 4.002  
 3.999  
 3.990  
 3.987  
 3.978  
 3.975  
 2.236  
 1.082  
 1.070  
 1.058

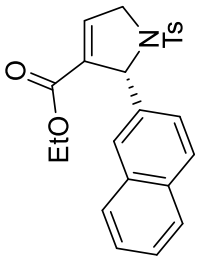

<sup>1</sup>H NMR, 600MHz  
 Solvent: CDCl<sub>3</sub>

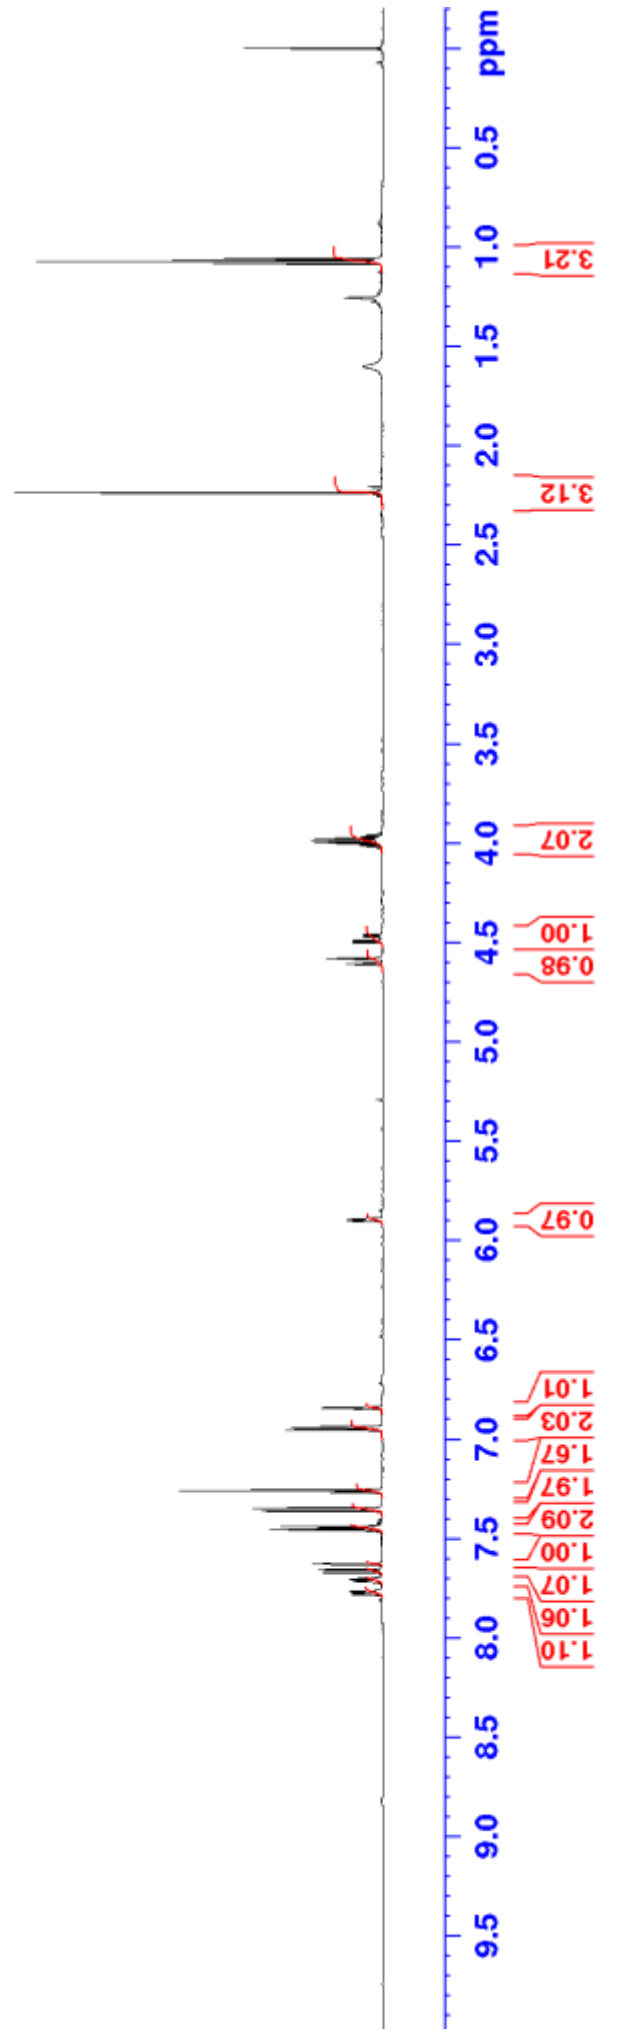

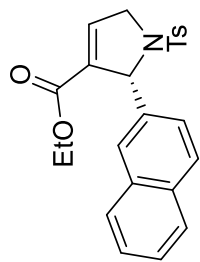

<sup>13</sup>C NMR, 150MHz  
Solvent: CDCl<sub>3</sub>

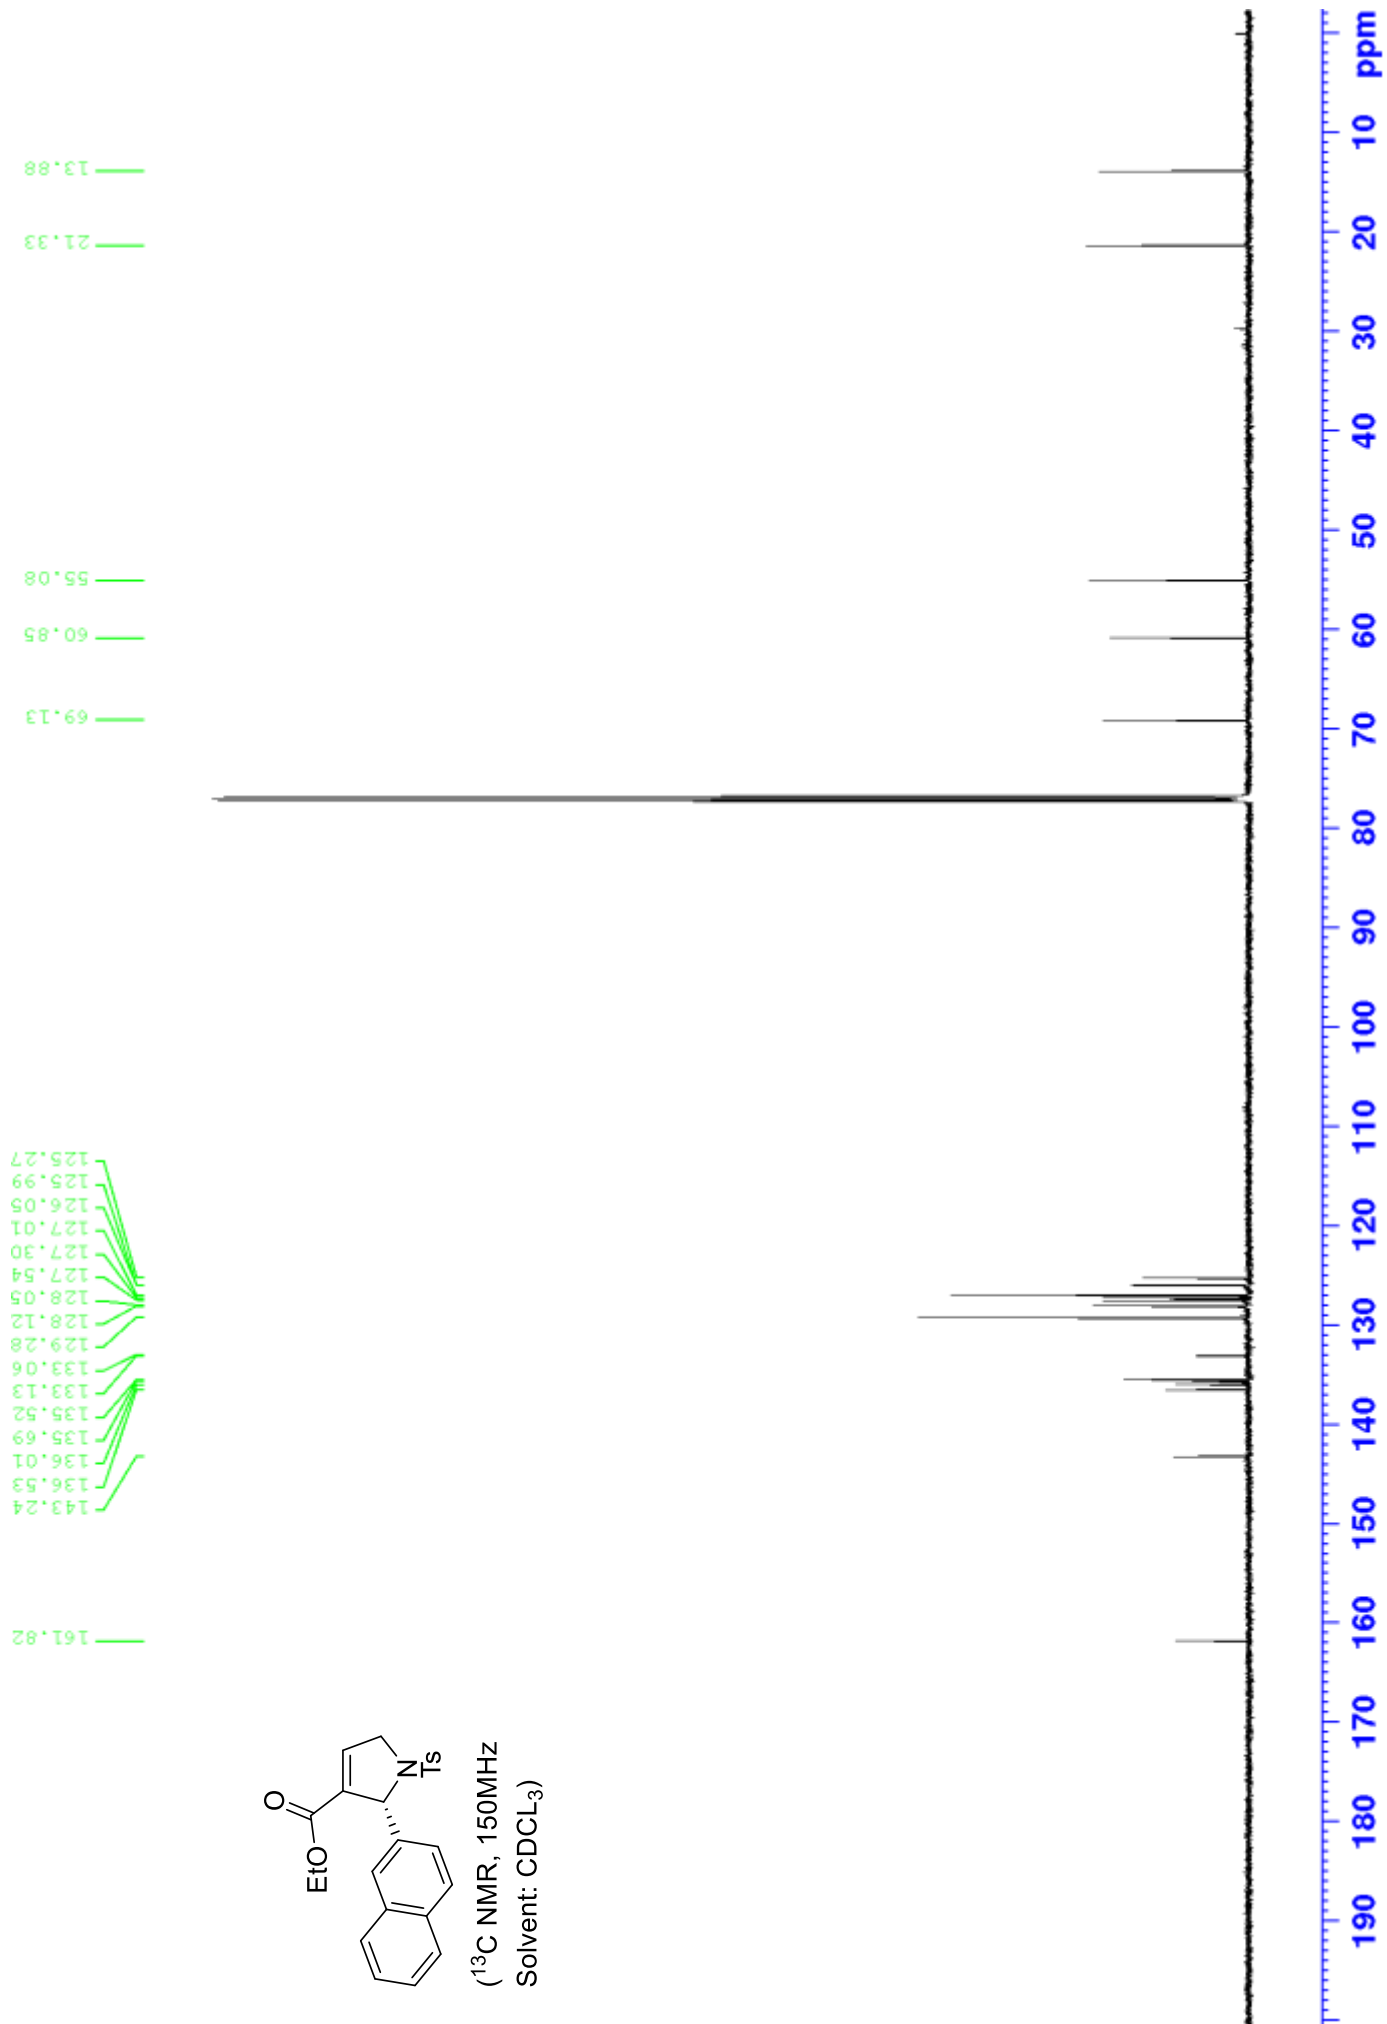



7.609  
 7.596  
 7.299  
 7.296  
 7.289  
 7.286  
 7.284  
 7.220  
 7.207  
 7.191  
 7.187  
 7.185  
 7.180  
 7.178  
 7.175  
 7.170  
 7.165  
 7.162  
 7.158  
 7.153  
 7.150  
 7.147  
 6.144  
 6.142  
 6.138  
 6.135  
 6.132  
 6.129  
 4.507  
 4.504  
 4.497  
 4.494  
 4.485  
 4.481  
 4.480  
 4.476  
 4.452  
 4.040  
 4.034  
 4.028  
 4.022  
 4.010  
 4.001  
 3.998  
 3.989  
 3.977  
 3.971  
 3.966  
 3.959  
 2.392  
 1.086  
 1.074  
 1.063

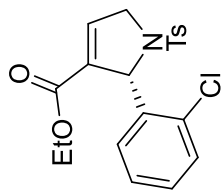

<sup>1</sup>H NMR, 600MHz  
 Solvent: CDCl<sub>3</sub>

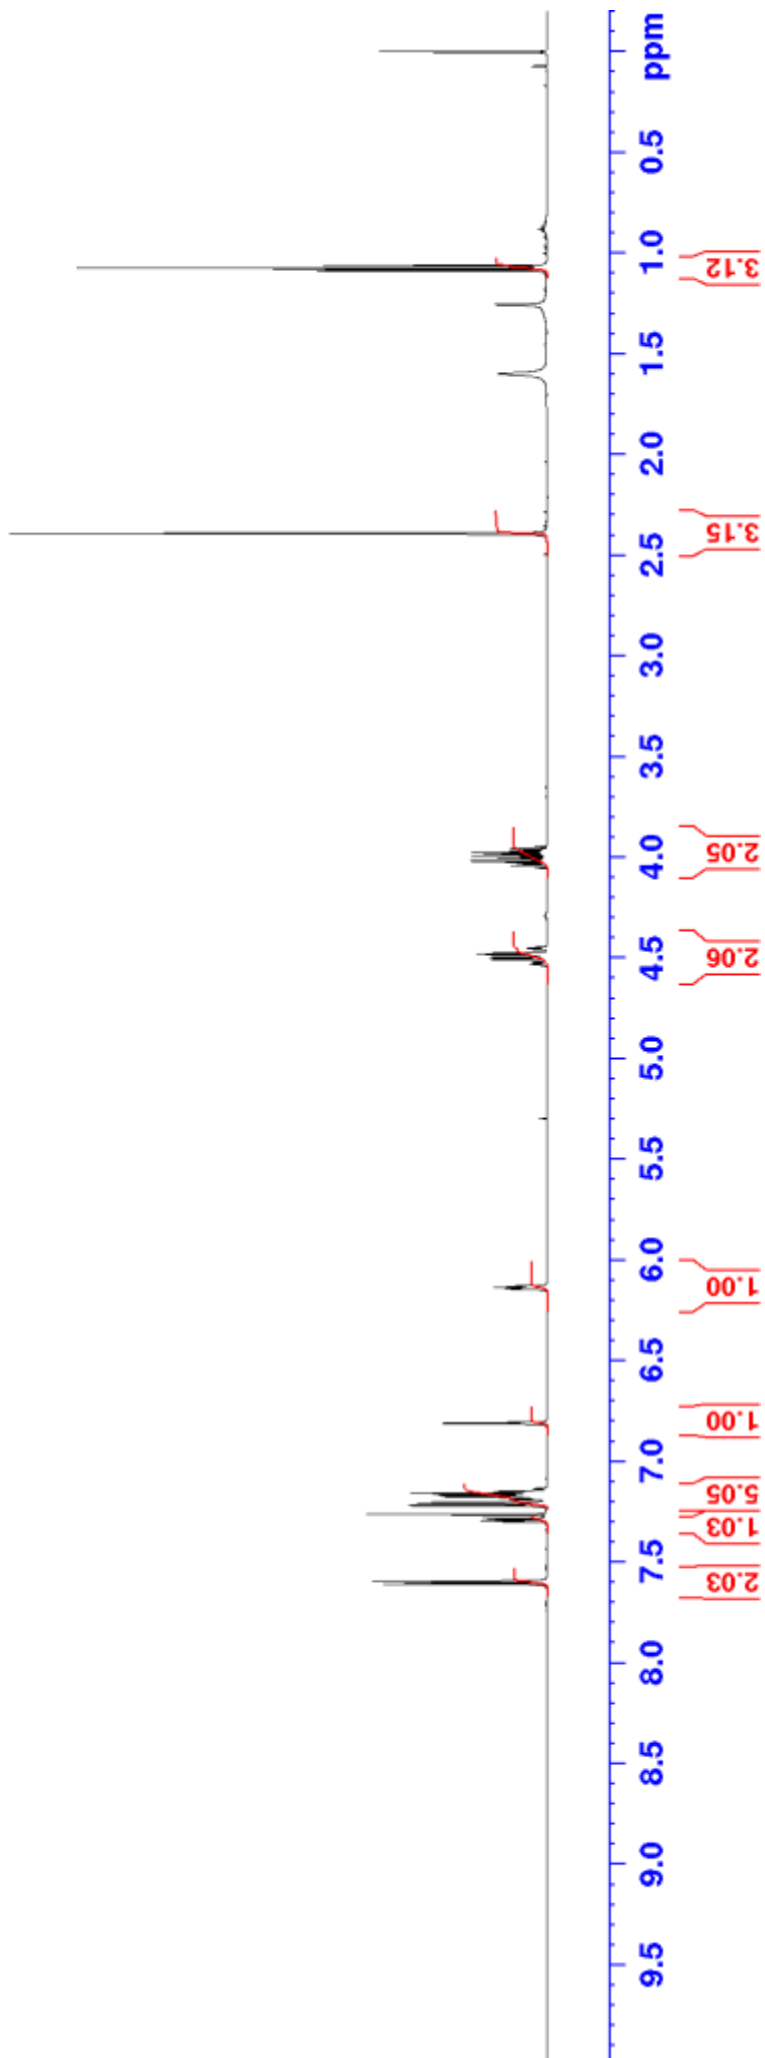

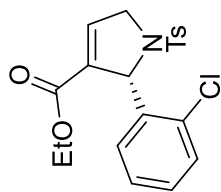

<sup>13</sup>C NMR, 150MHz  
Solvent: CDCL<sub>3</sub>

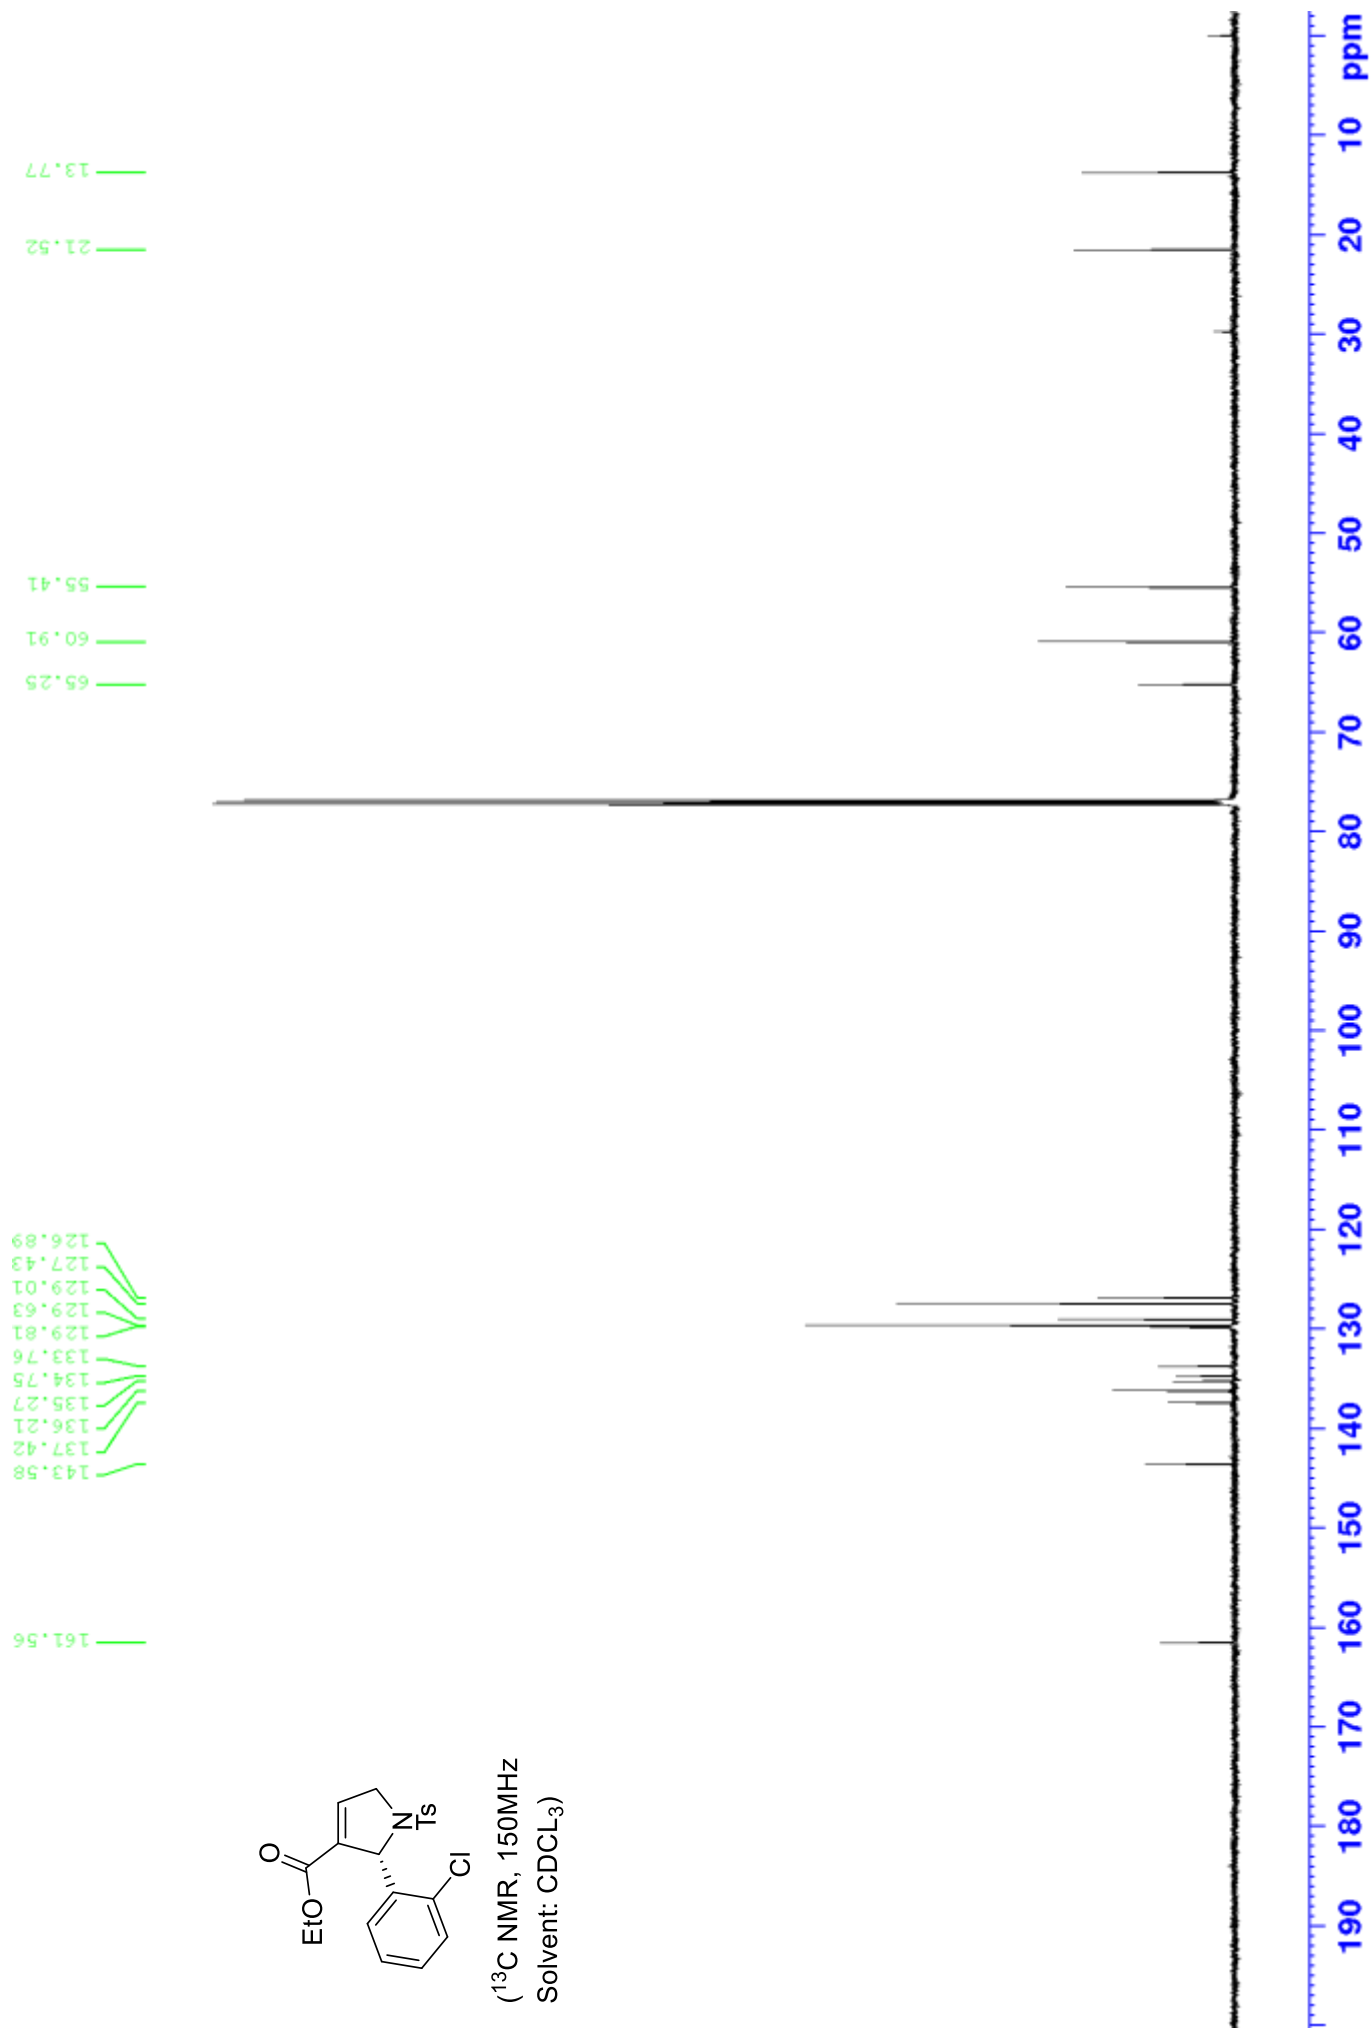

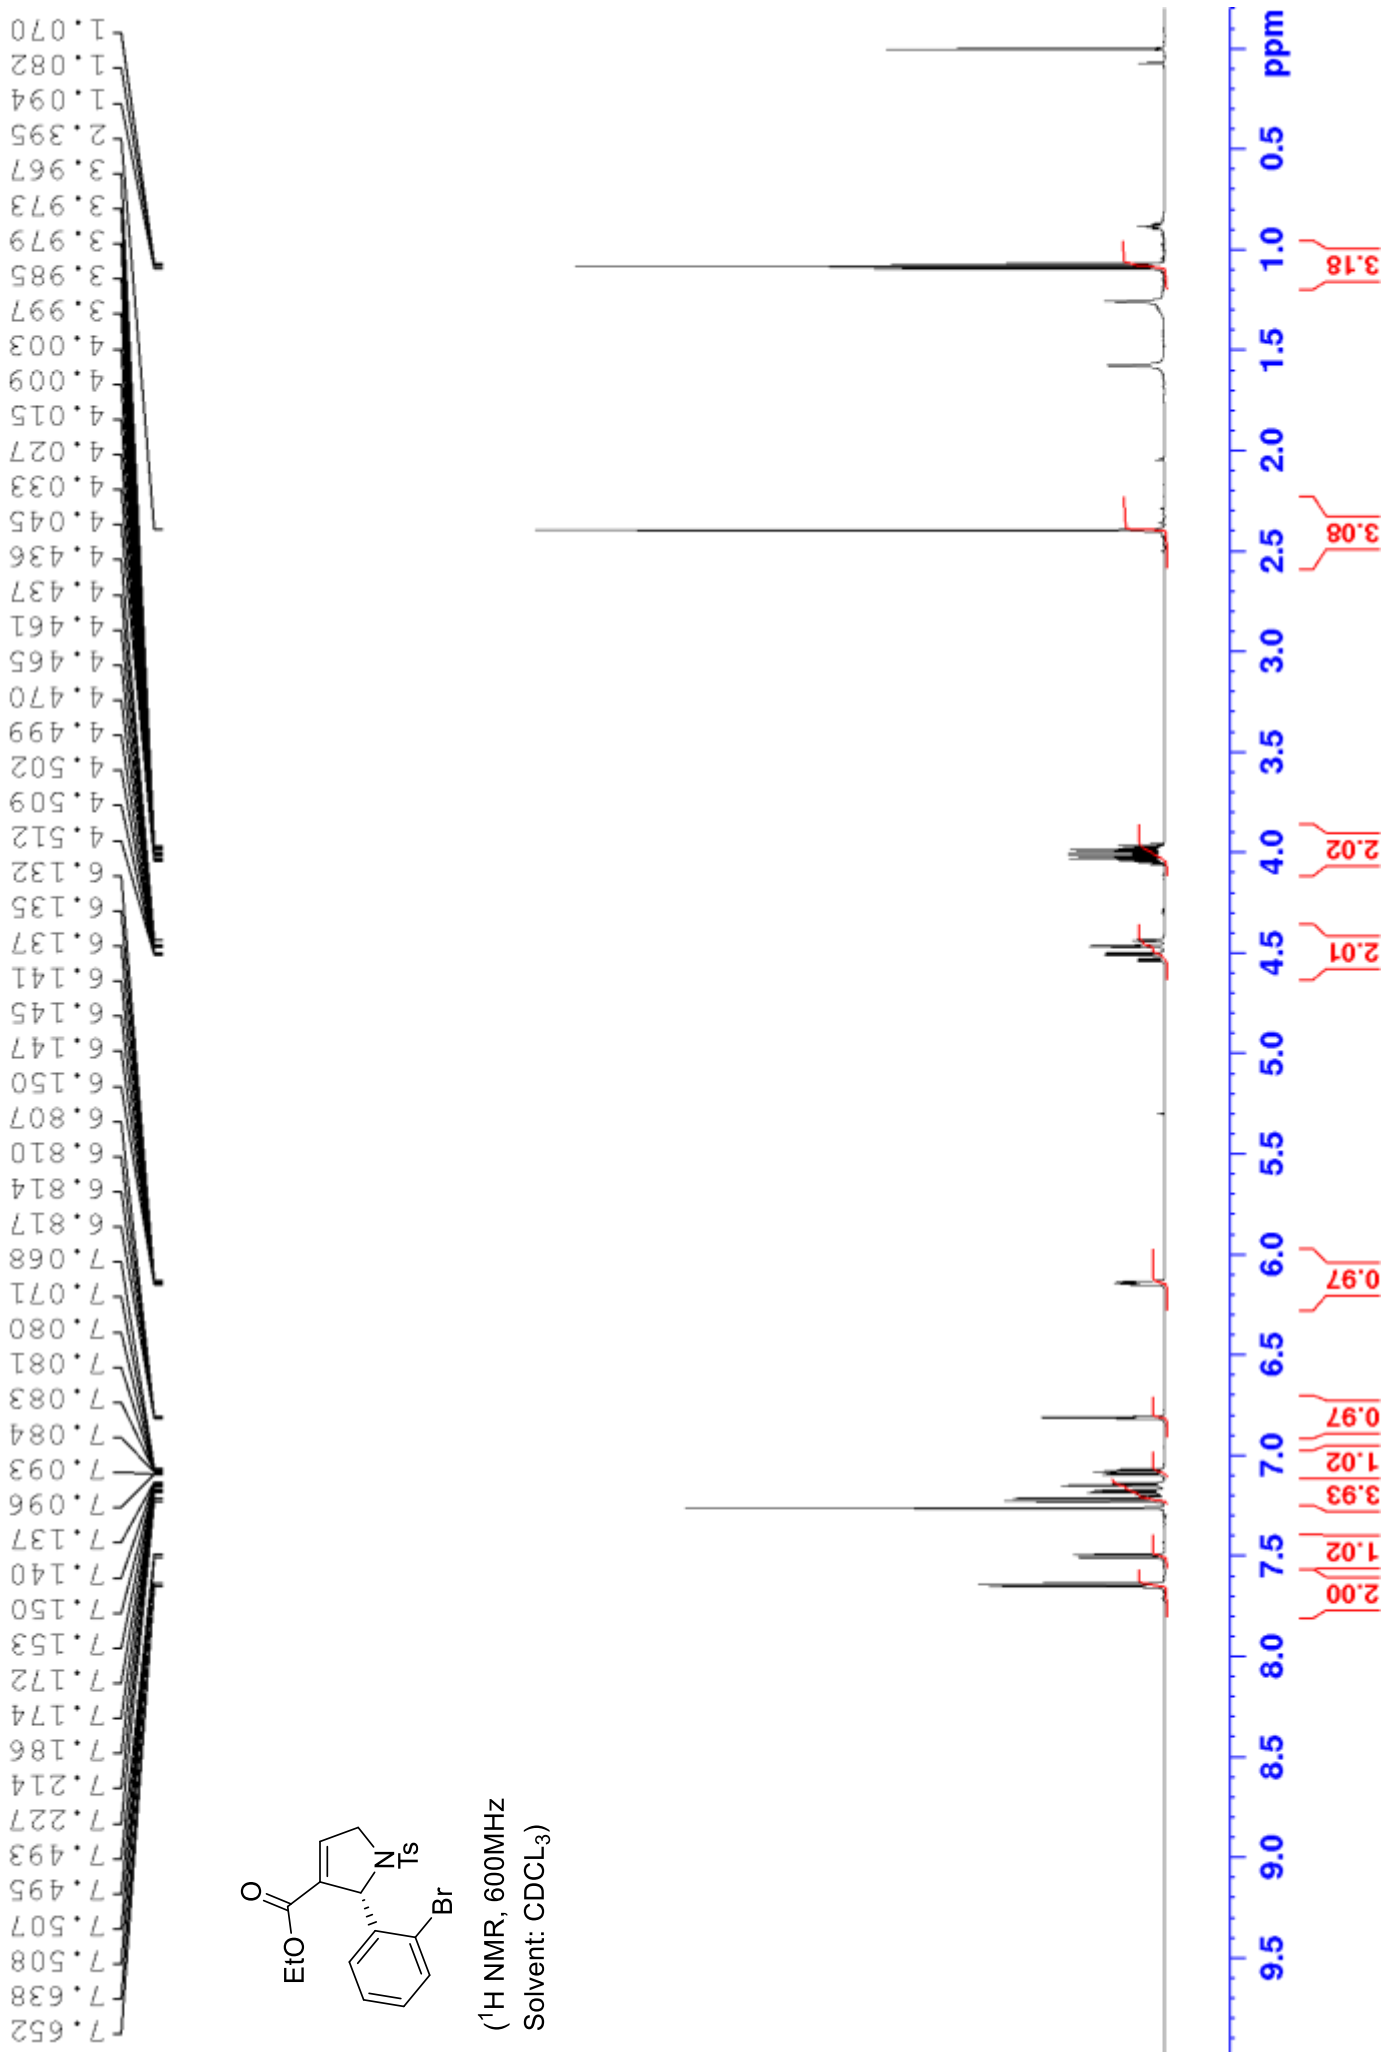

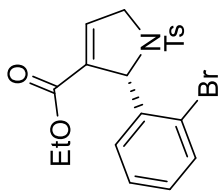

(<sup>13</sup>C NMR, 150MHz  
Solvent: CDCl<sub>3</sub>)

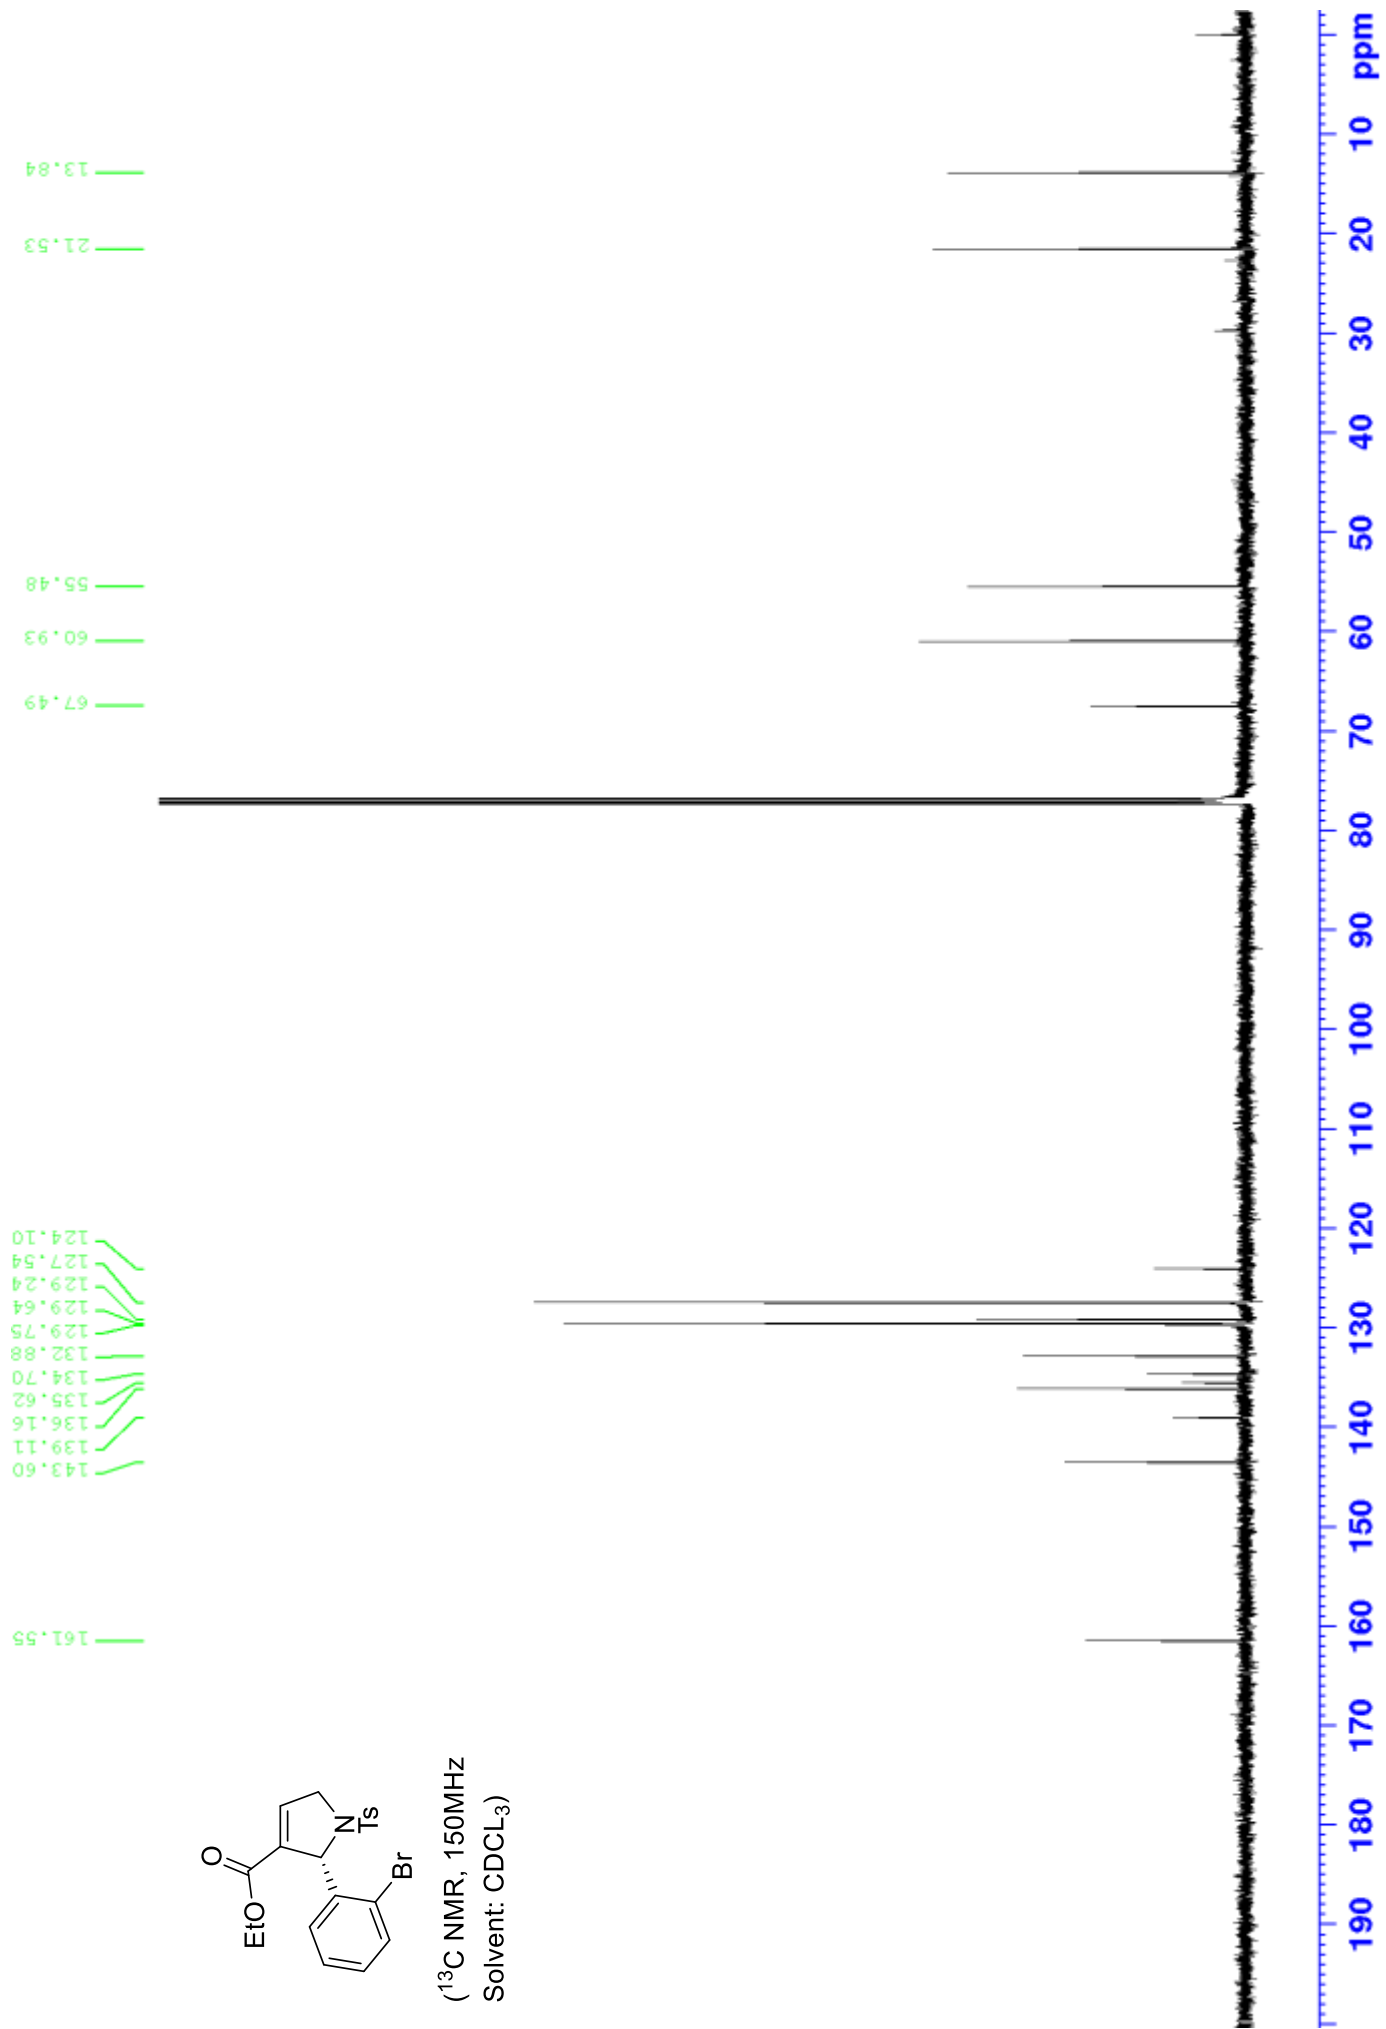

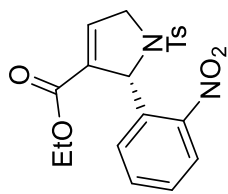

<sup>1</sup>H NMR, 600MHz  
Solvent: CDCl<sub>3</sub>

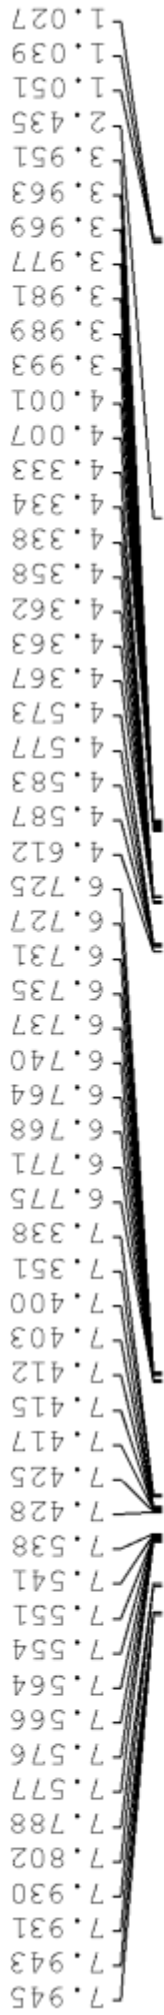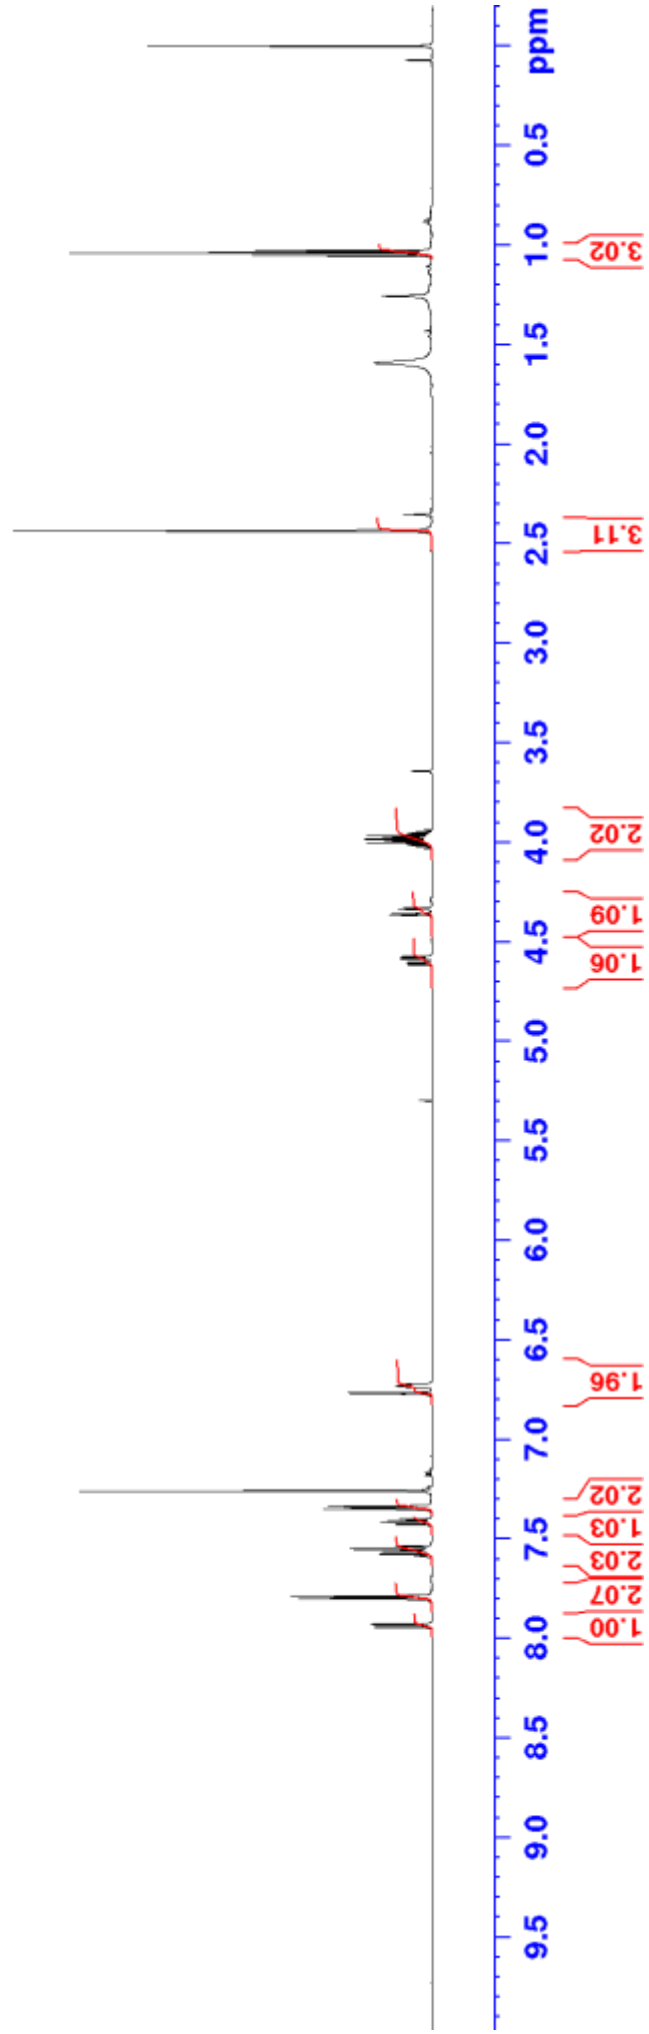

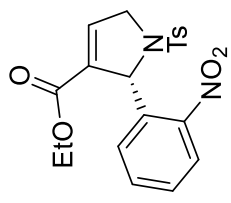

(<sup>13</sup>C NMR, 150MHz  
Solvent: CDCL<sub>3</sub>)

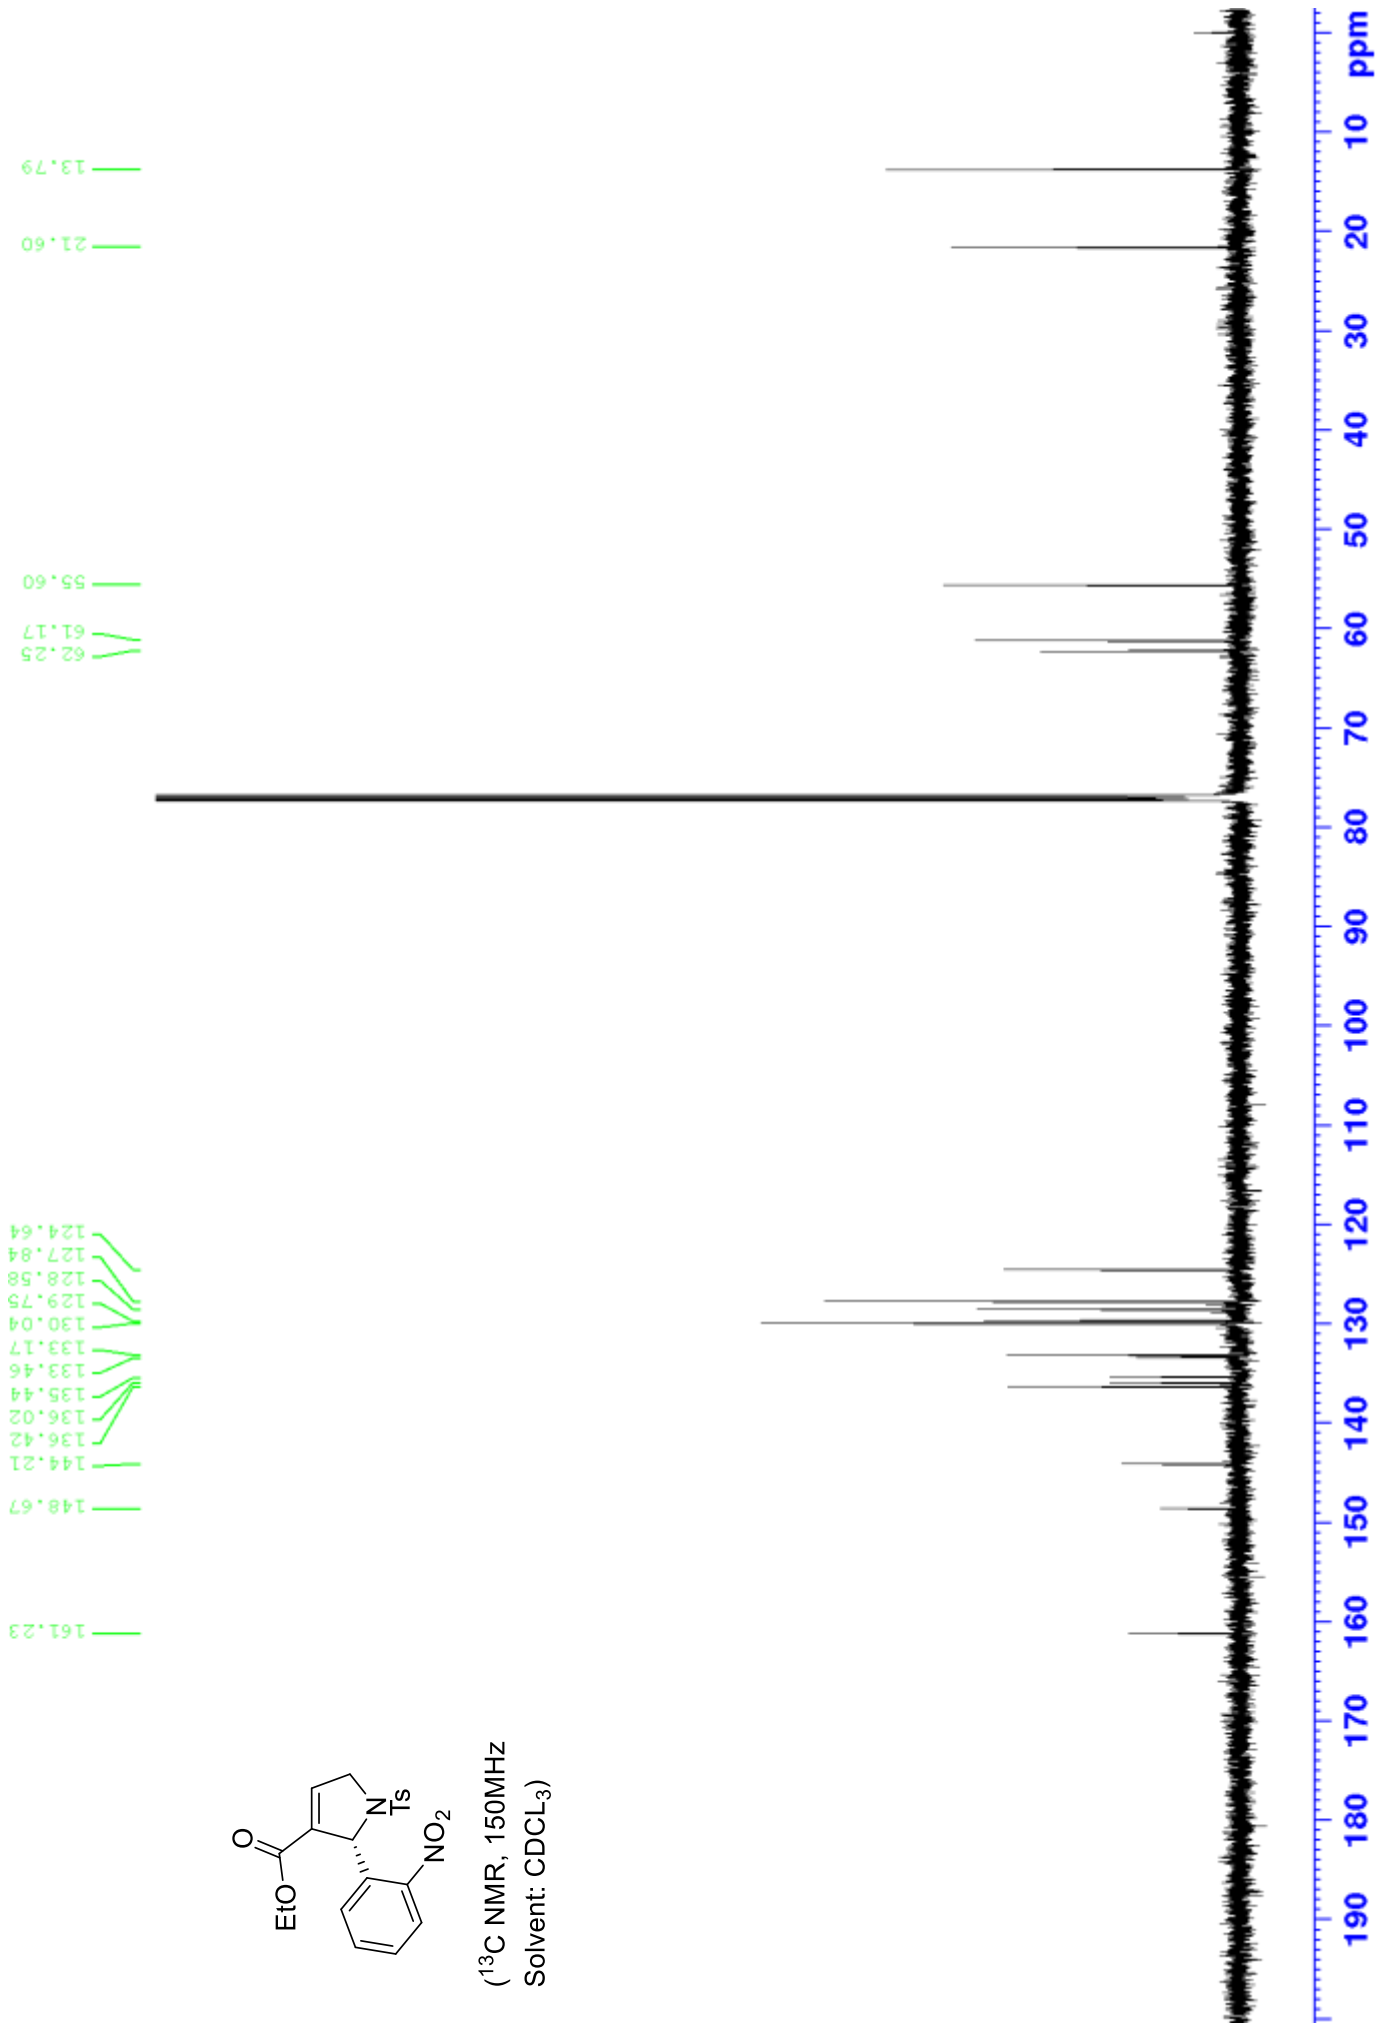

7.403  
 7.400  
 7.392  
 7.389  
 7.194  
 7.191  
 7.182  
 7.180  
 7.179  
 7.178  
 7.166  
 7.164  
 7.154  
 7.151  
 7.127  
 7.114  
 6.932  
 6.919  
 6.918  
 6.913  
 6.911  
 6.900  
 6.899  
 6.888  
 6.886  
 6.782  
 6.779  
 6.775  
 6.772  
 6.065  
 6.061  
 6.058  
 6.055  
 4.985  
 4.974  
 4.961  
 4.950  
 4.524  
 4.500  
 4.496  
 4.492  
 4.395  
 4.391  
 4.384  
 4.381  
 4.044  
 4.032  
 4.026  
 4.014  
 3.987  
 3.975  
 3.969  
 3.957  
 3.418  
 2.363  
 1.082  
 1.070  
 1.058

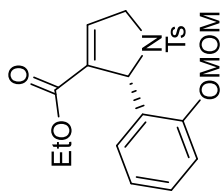

<sup>1</sup>H NMR, 600MHz  
 Solvent: CDCl<sub>3</sub>

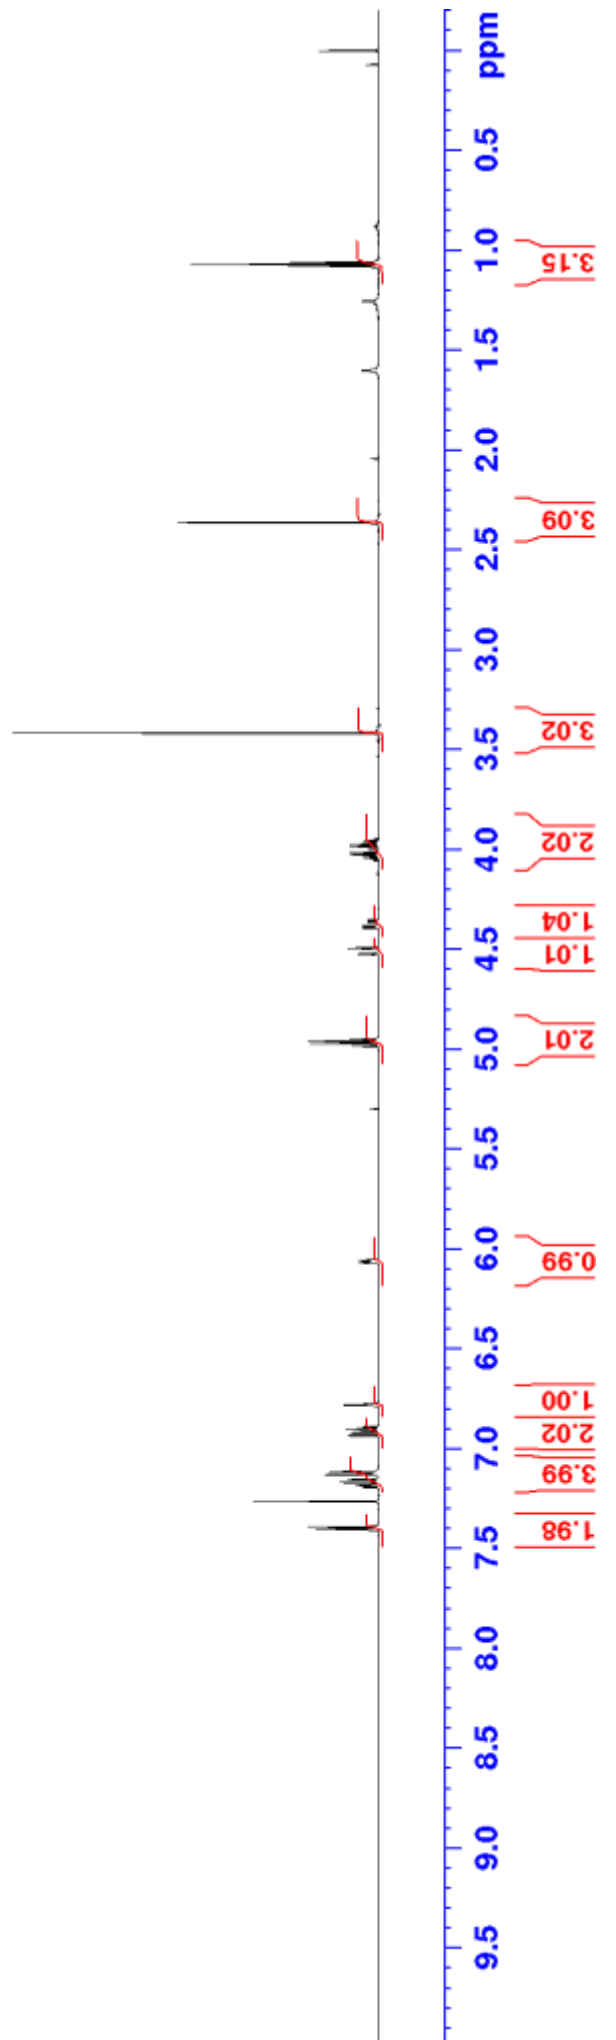

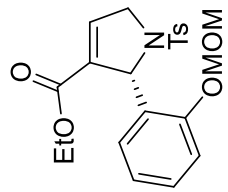

(<sup>13</sup>C NMR, 150MHz  
Solvent: CDCl<sub>3</sub>)

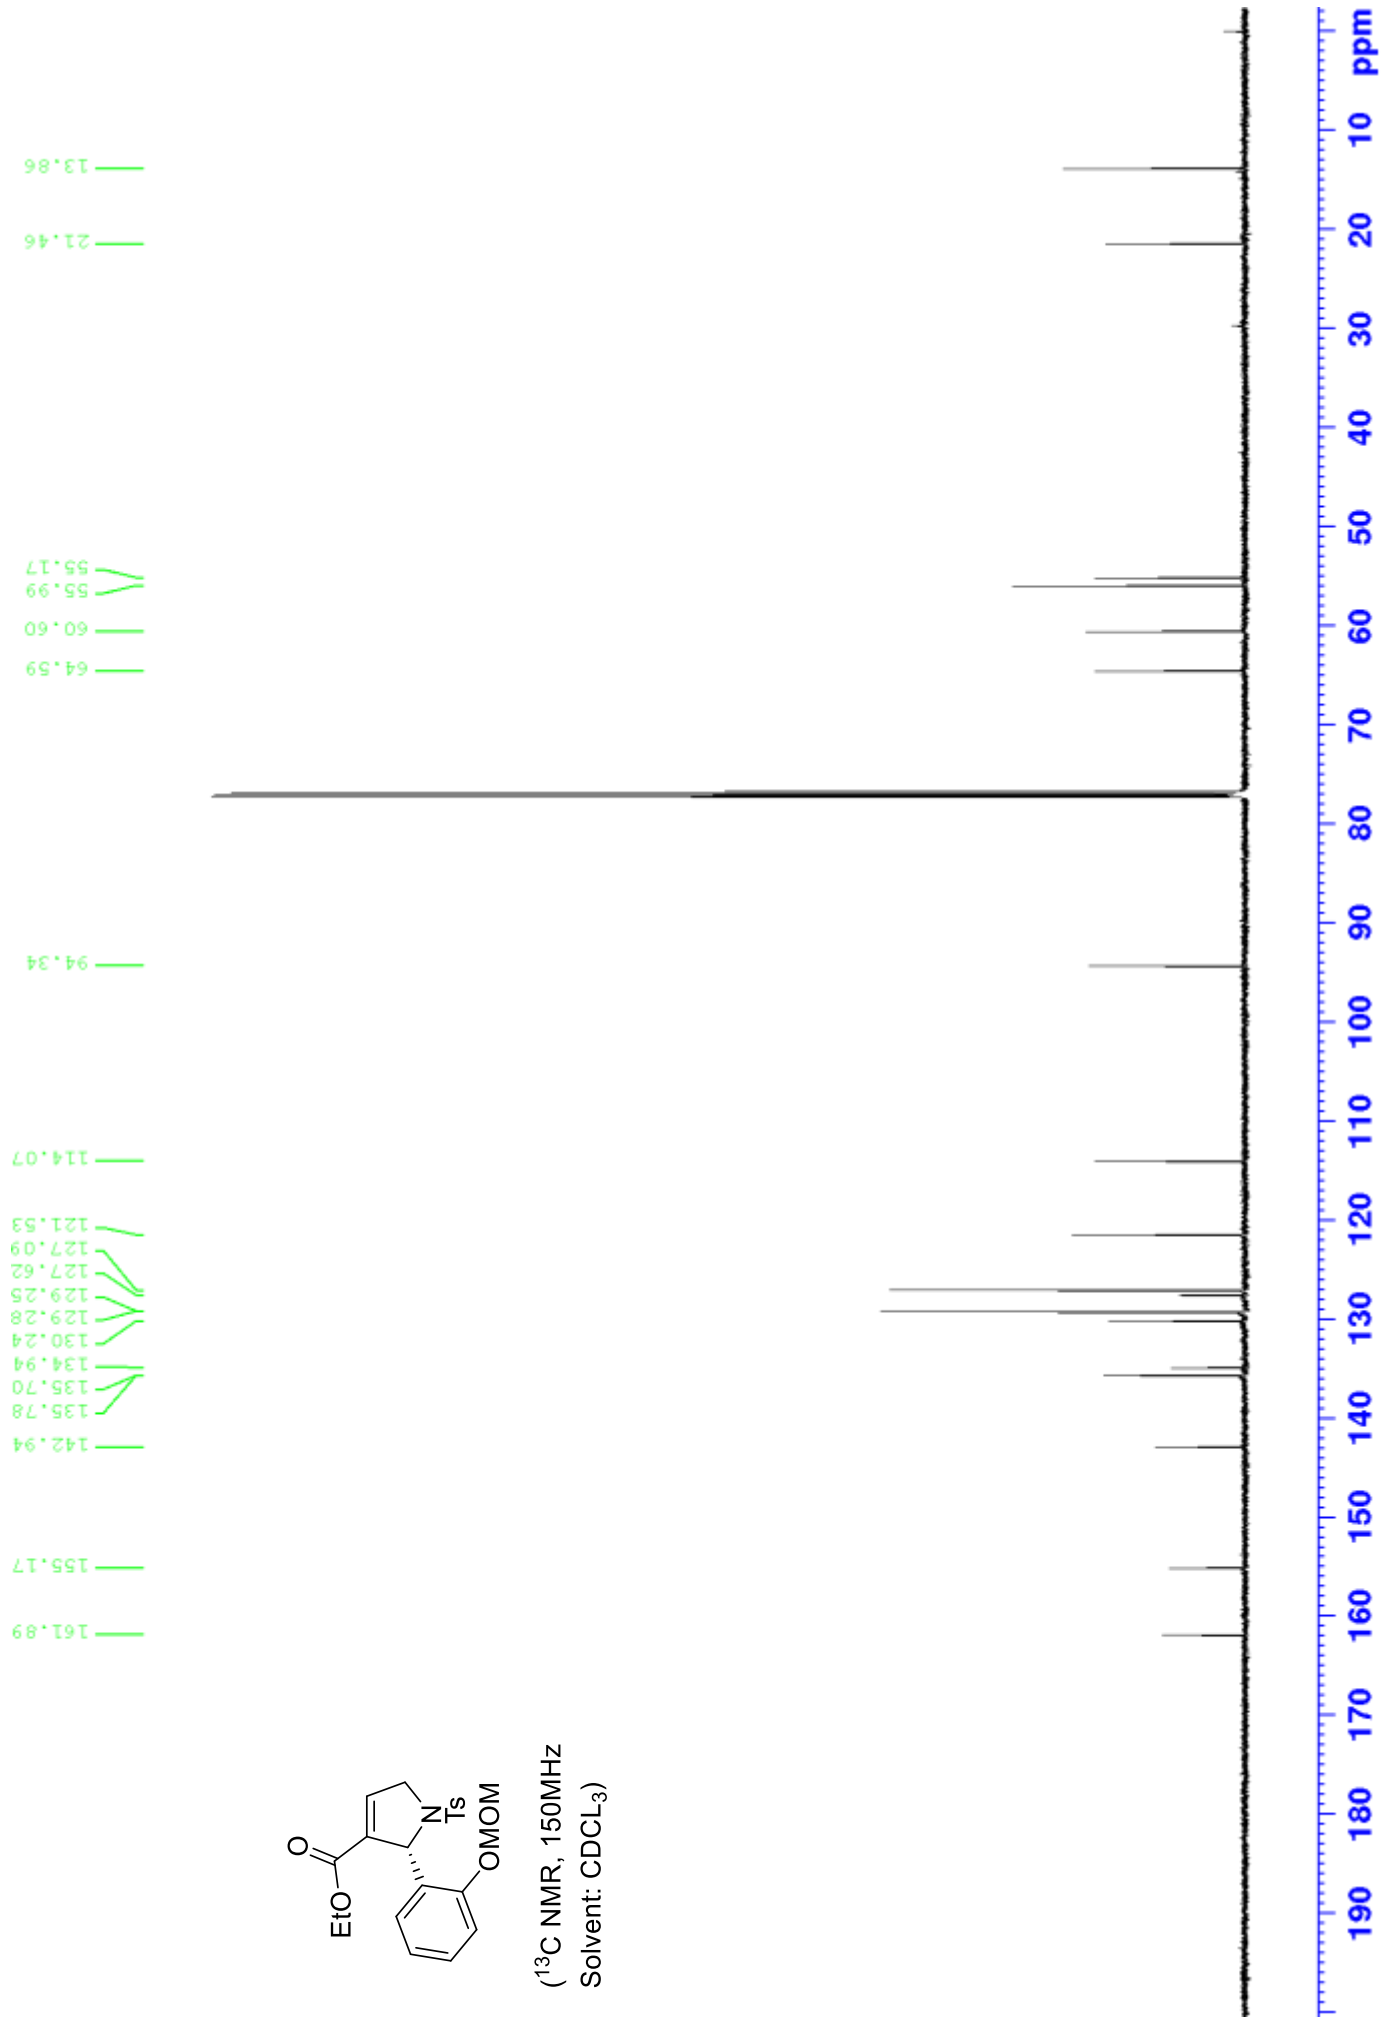



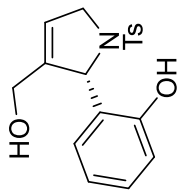

<sup>1</sup>H NMR, 600MHz  
Solvent: CDCl<sub>3</sub>

7.617  
7.603  
7.303  
7.221  
7.207  
7.154  
7.152  
7.141  
7.139  
7.064  
7.061  
7.051  
7.049  
7.038  
7.036  
6.841  
6.829  
6.817  
6.716  
6.702  
5.903  
5.900  
5.577  
5.575  
4.288  
4.284  
4.280  
4.253  
4.229  
3.874  
3.850  
3.774  
3.751  
2.932  
2.363

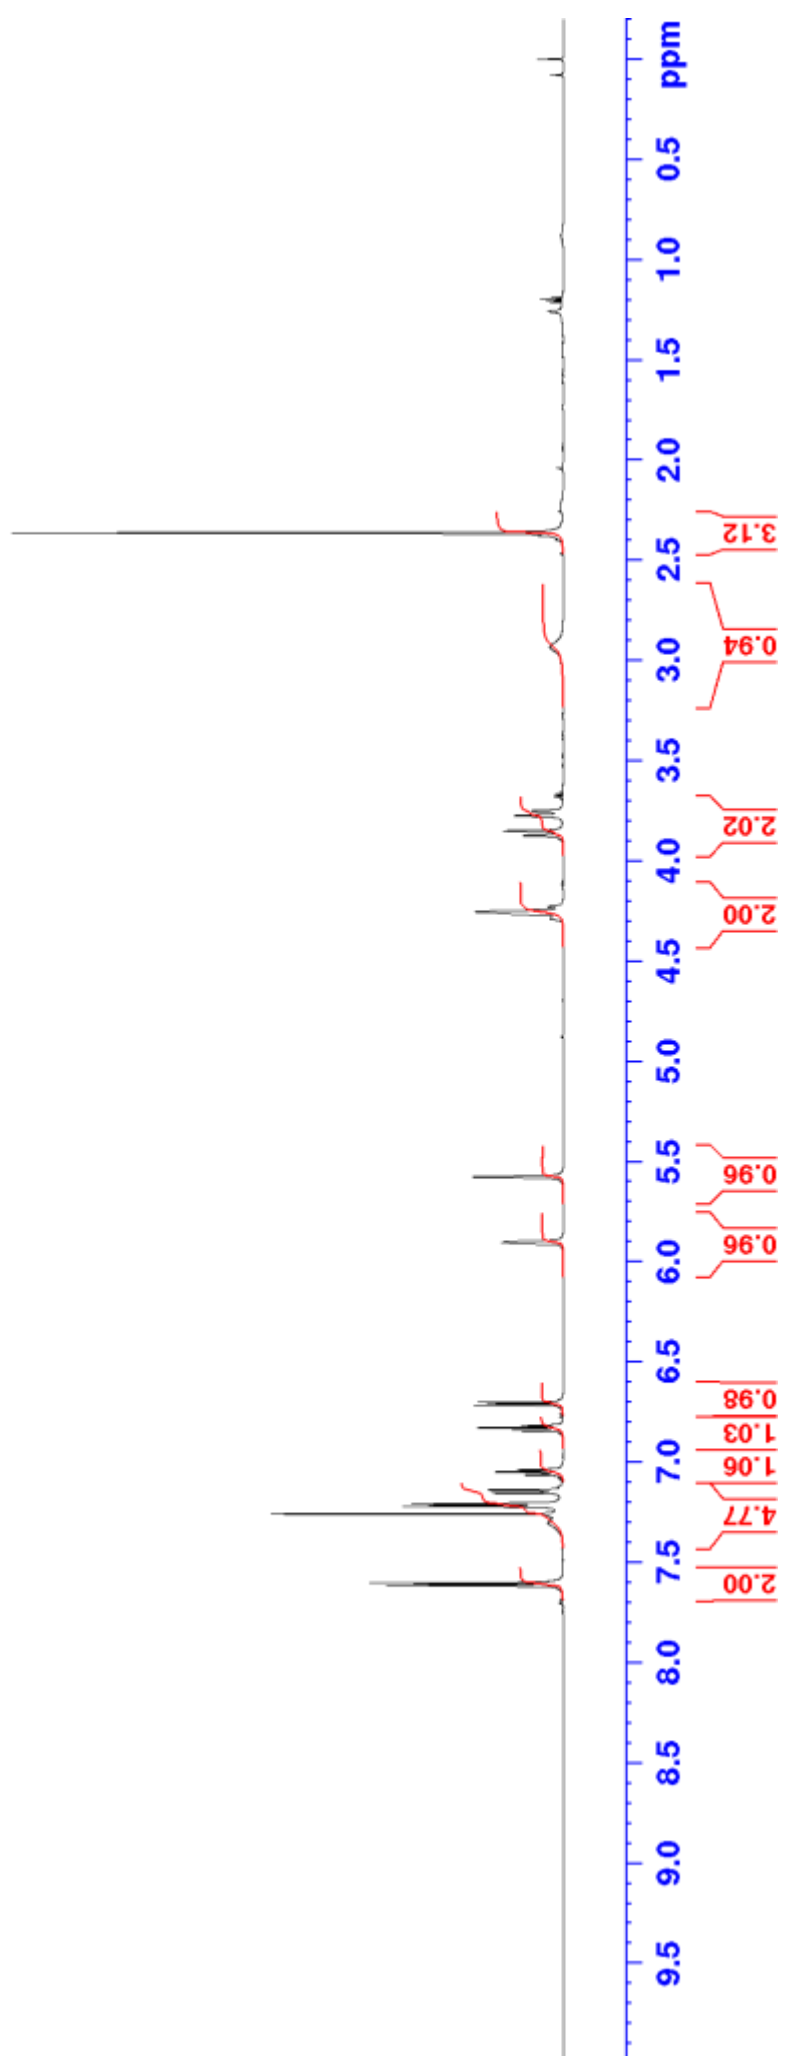

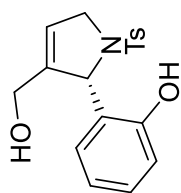

(<sup>13</sup>C NMR, 150MHz  
Solvent: CDCL<sub>3</sub>)

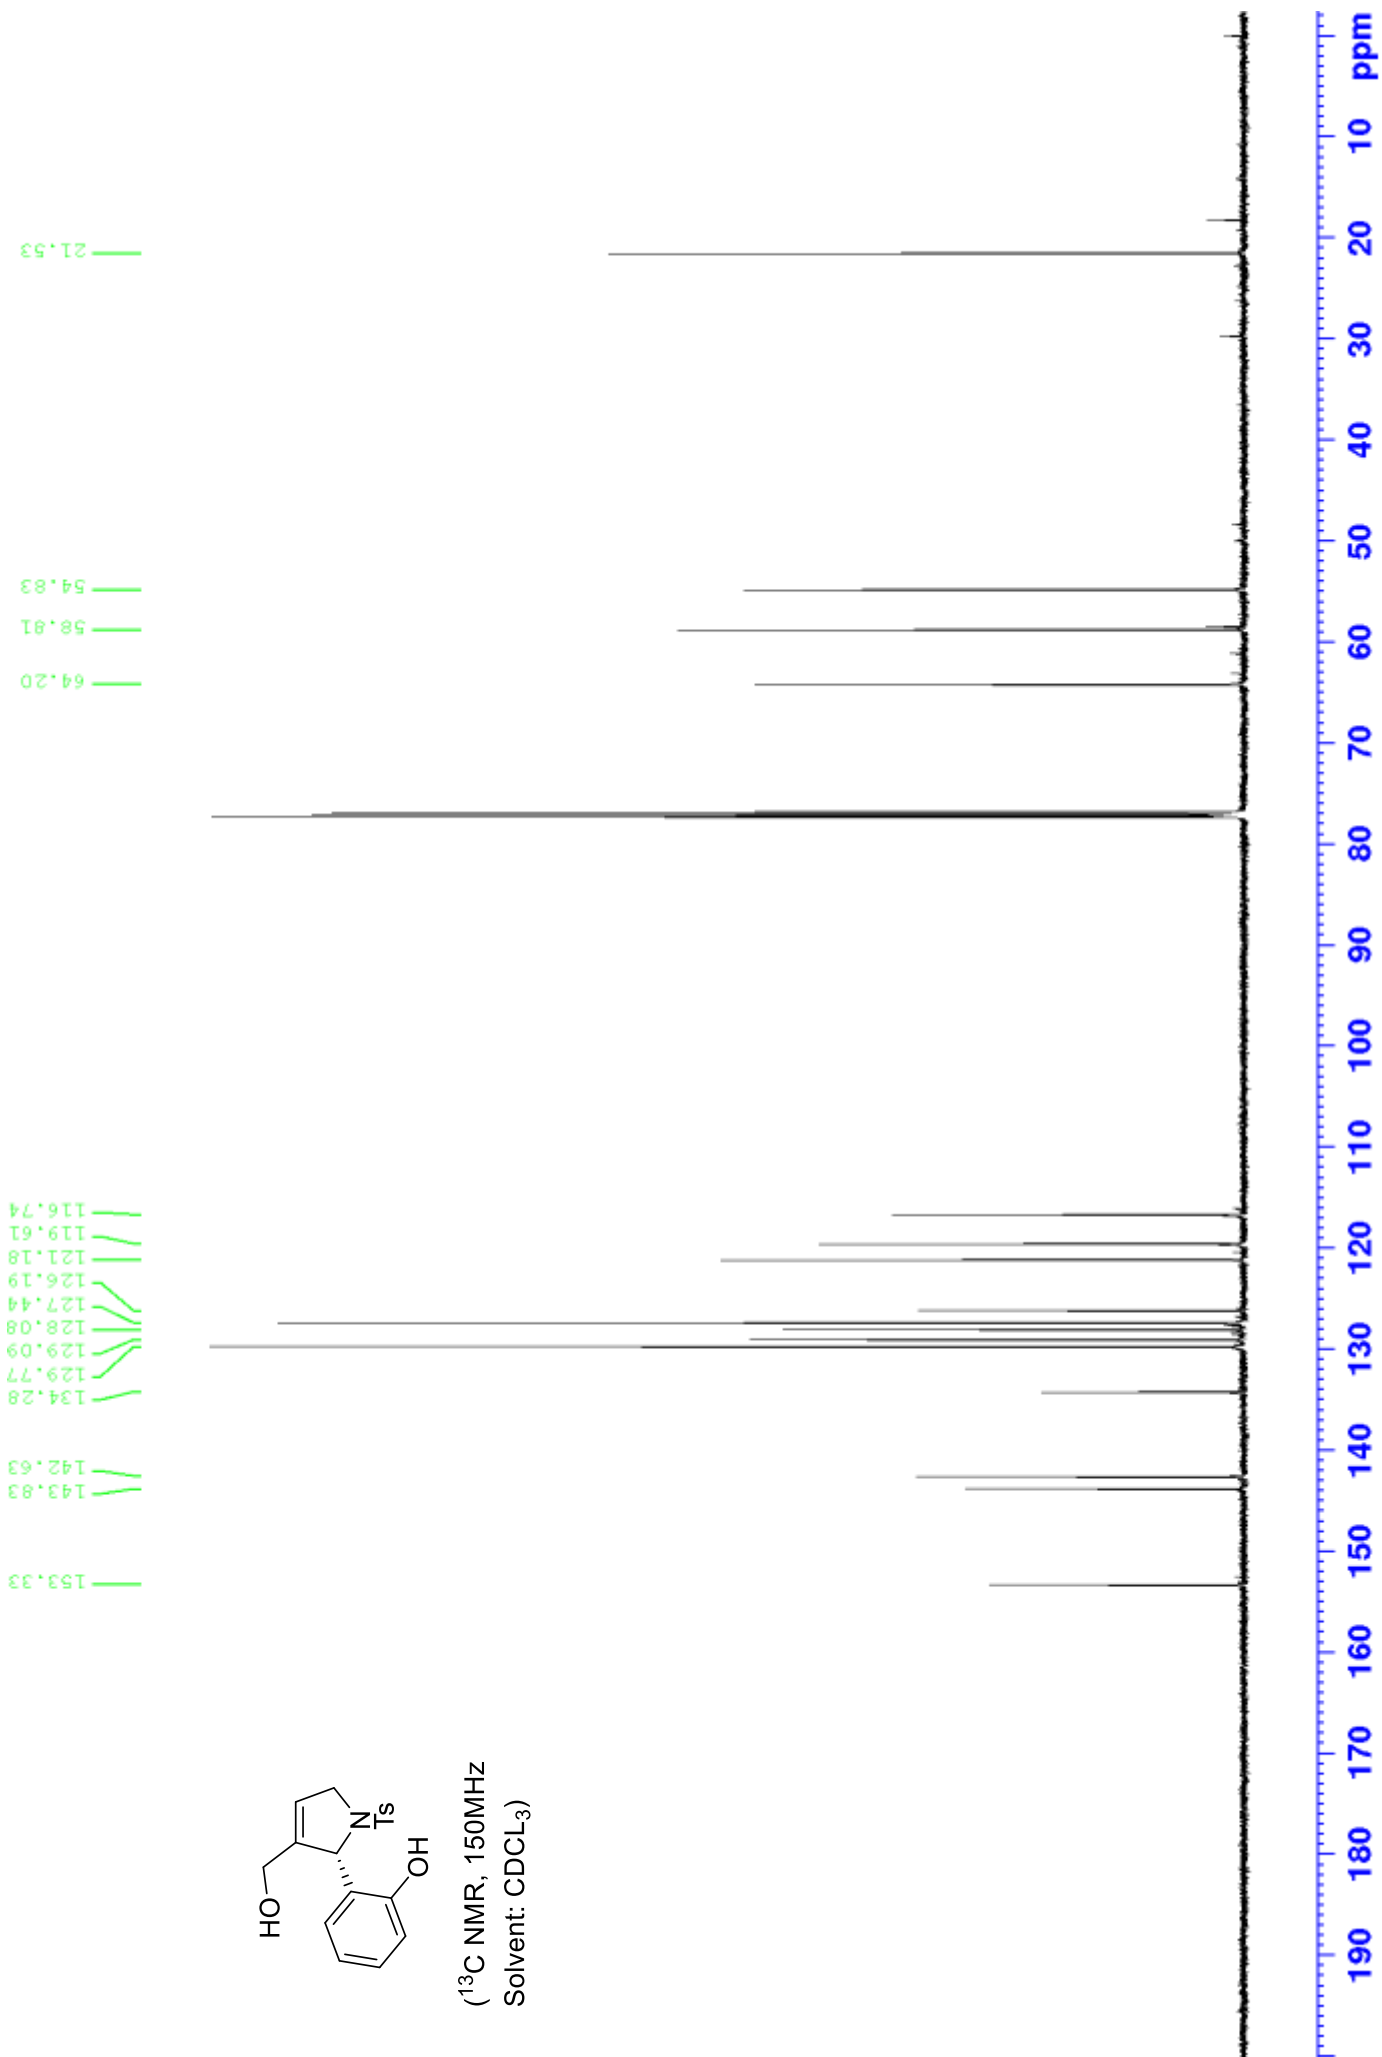

7.864  
 7.852  
 7.793  
 7.790  
 7.782  
 7.779  
 7.779  
 7.347  
 7.334  
 7.166  
 7.166  
 7.166  
 7.164  
 7.163  
 7.153  
 7.152  
 7.150  
 7.141  
 7.140  
 7.138  
 7.007  
 7.005  
 6.994  
 6.993  
 6.982  
 6.980  
 6.760  
 6.758  
 6.747  
 6.745  
 5.019  
 5.006  
 4.086  
 4.082  
 4.067  
 4.063  
 4.005  
 4.000  
 3.986  
 3.981  
 3.382  
 3.376  
 3.374  
 3.368  
 3.362  
 3.347  
 2.444  
 2.037  
 2.035  
 2.031  
 2.017  
 2.003  
 1.997  
 1.986  
 1.973  
 1.968  
 1.845  
 1.838  
 1.826

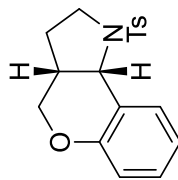

<sup>1</sup>H NMR, 600MHz  
 Solvent: CDCL<sub>3</sub>

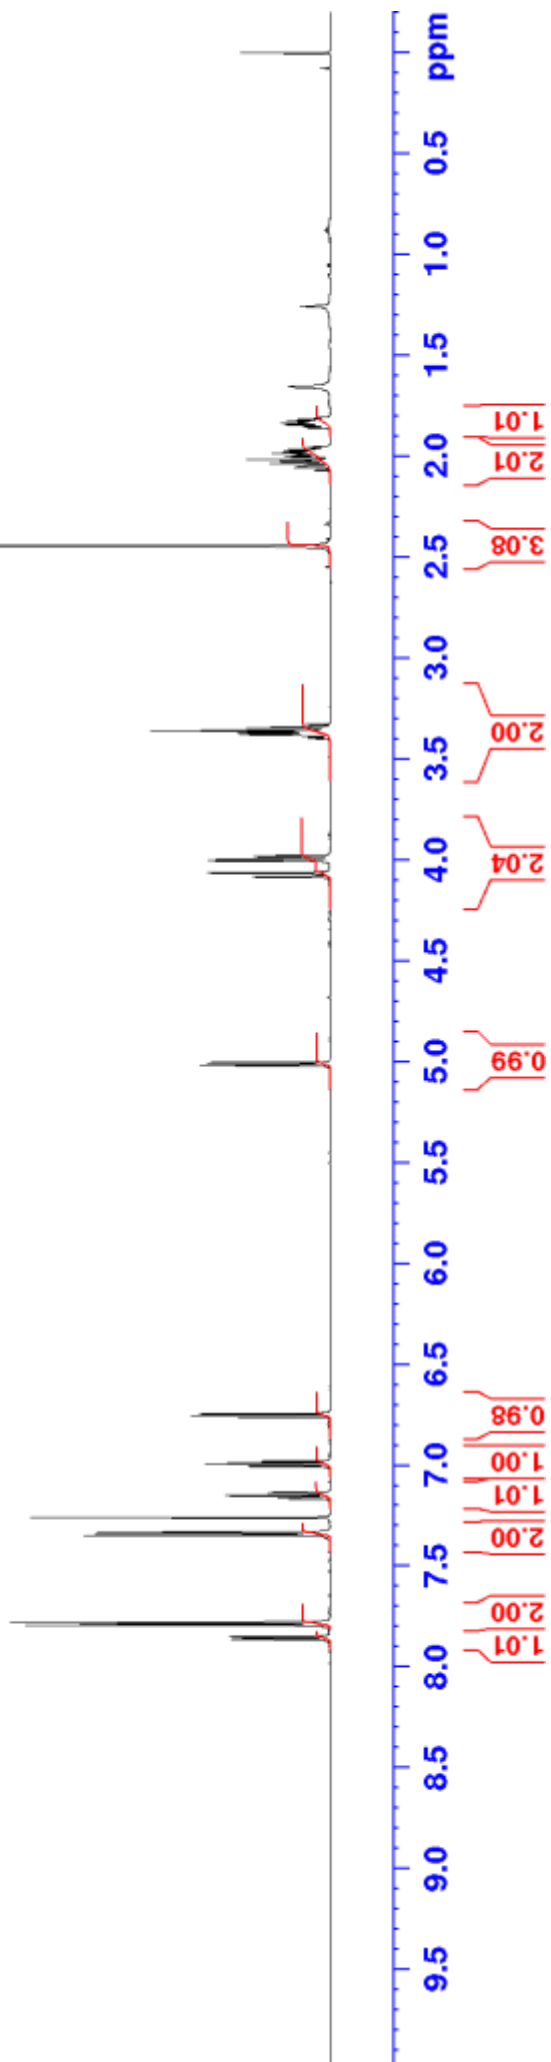

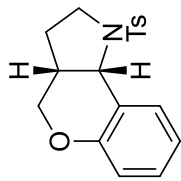

$^{13}\text{C}$  NMR, 150MHz  
Solvent:  $\text{CDCl}_3$

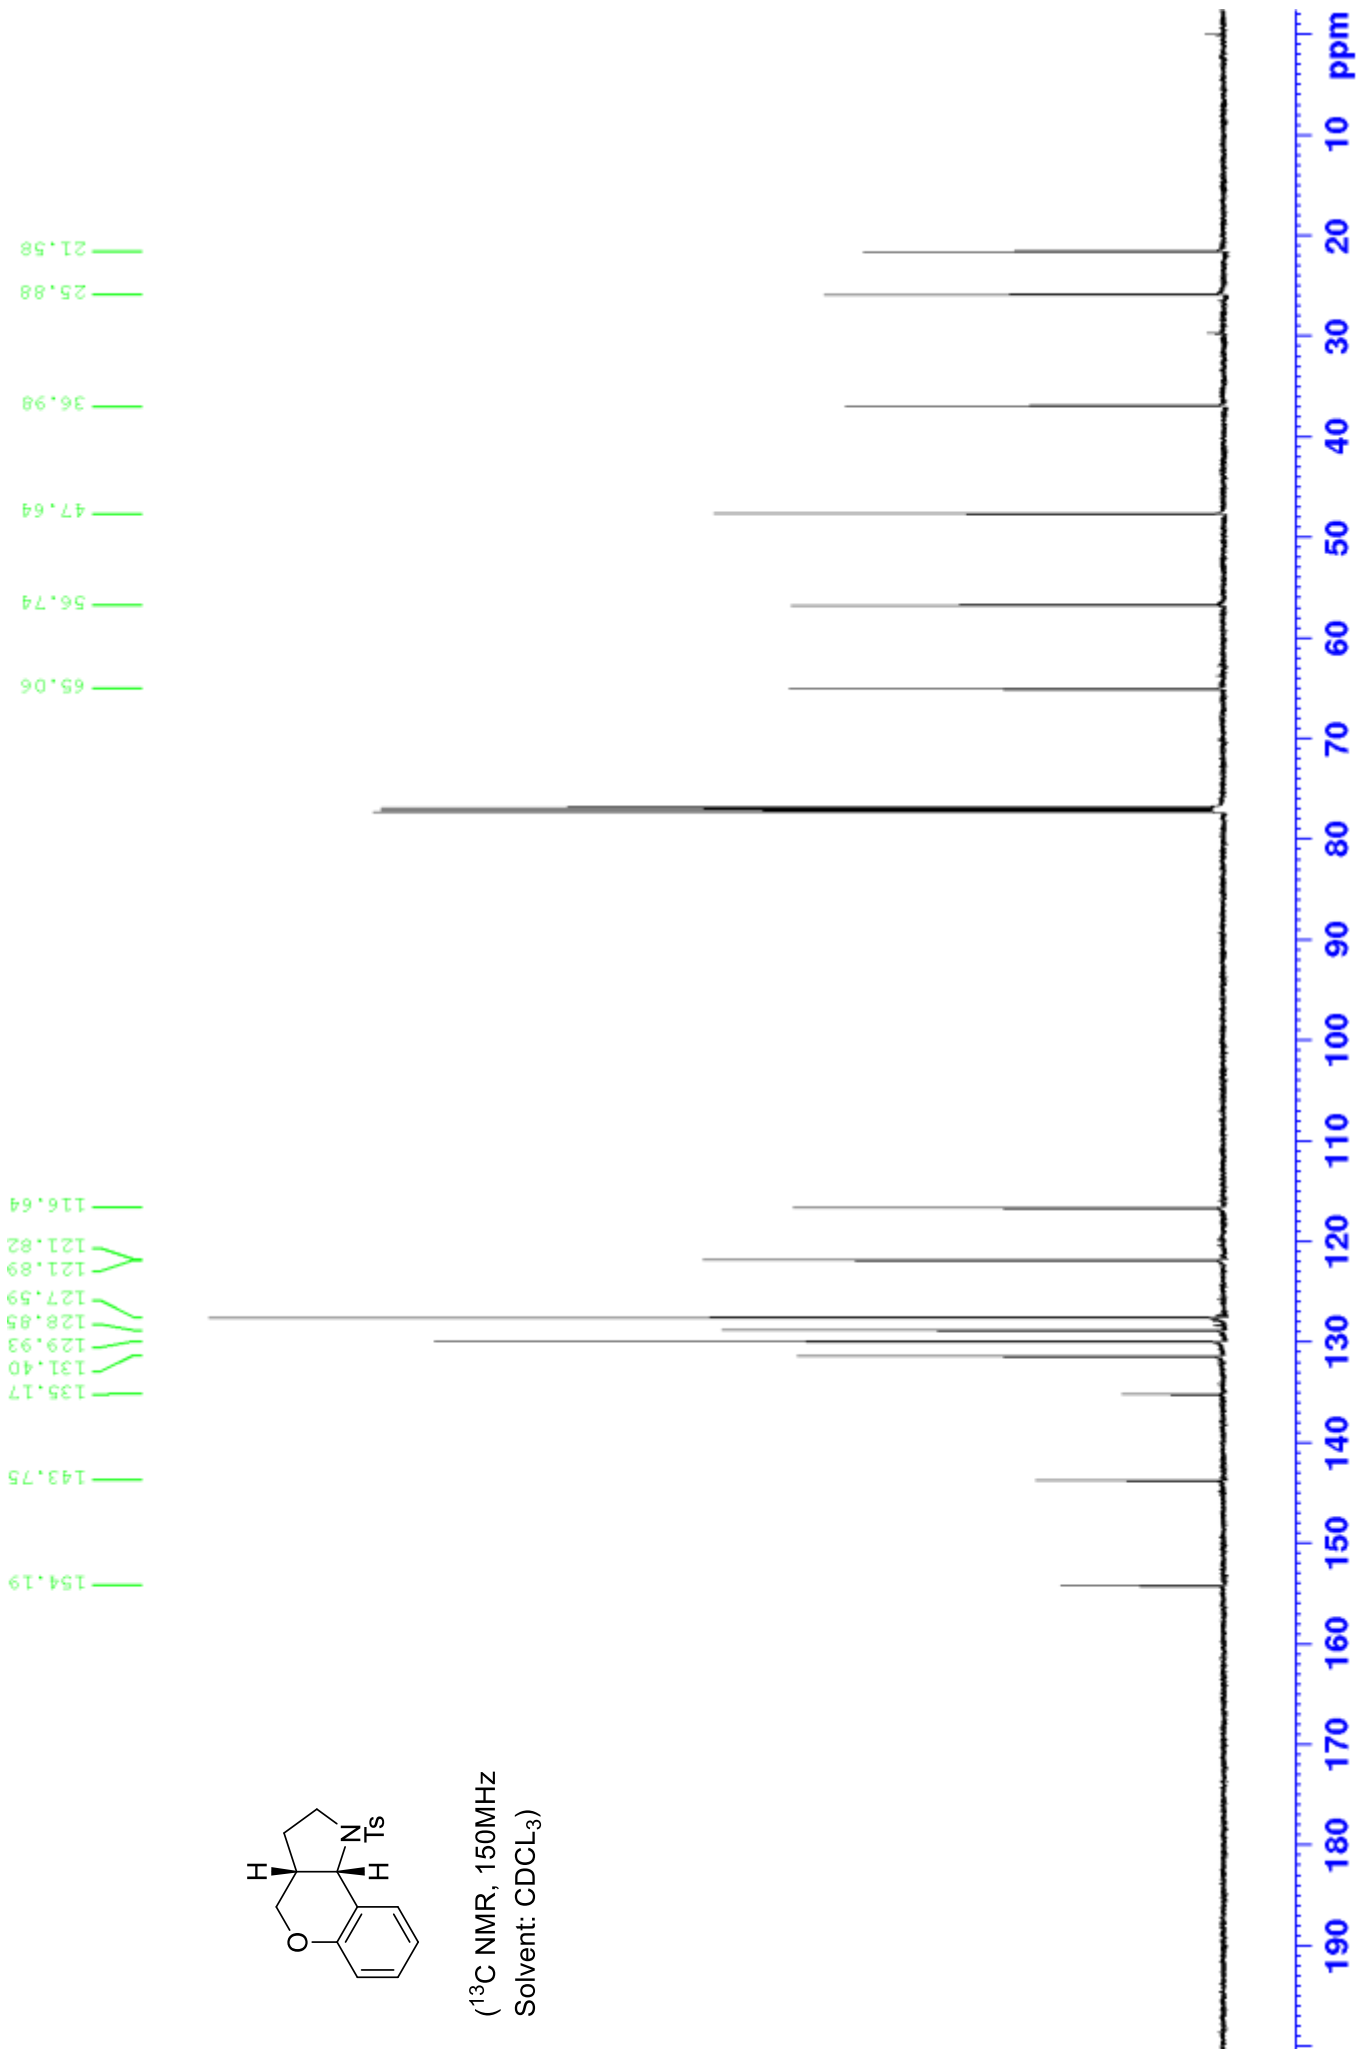

HPLC Data

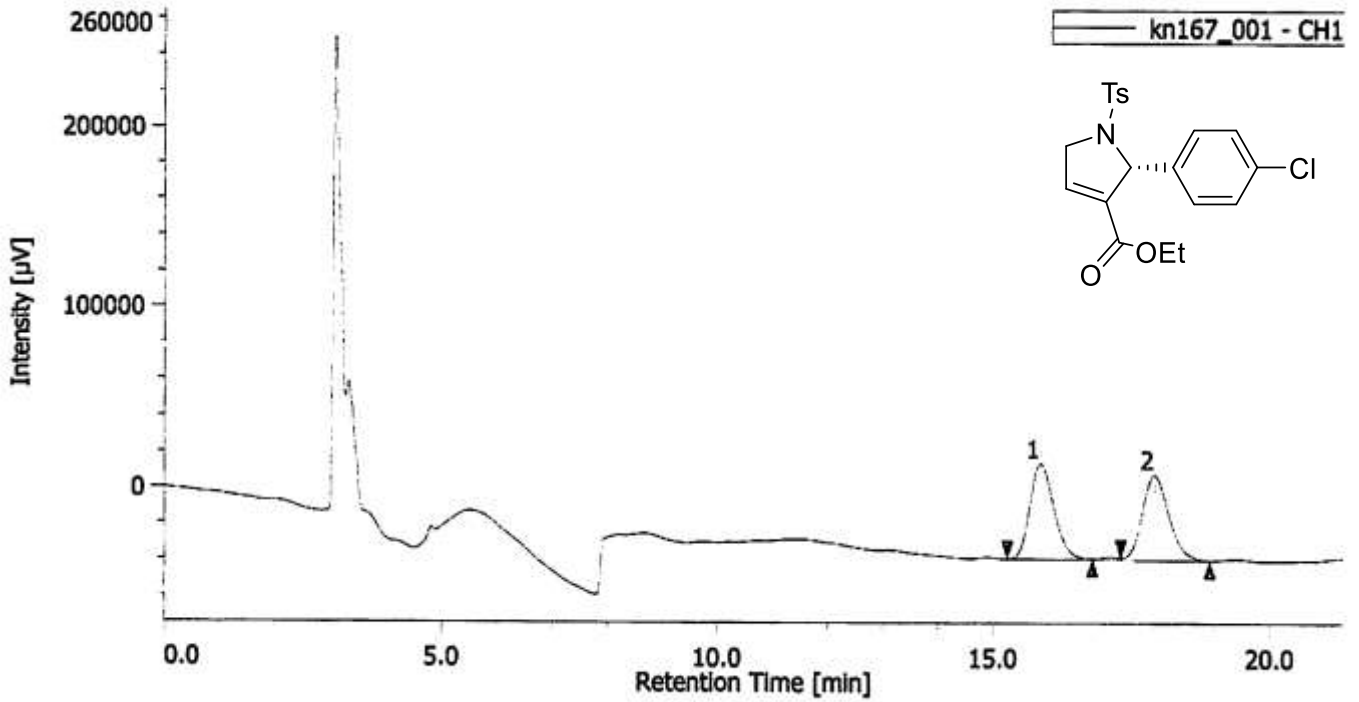

| # | ピーク名    | CH | tR [min] | 面積 [μV·sec] | 高さ [μV] | 面積%    | 高さ%    | 定量値 | NTP  | 分離度   | シンメトリー係数 | 警告 |
|---|---------|----|----------|-------------|---------|--------|--------|-----|------|-------|----------|----|
| 1 | Unknown | 1  | 15.850   | 1576787     | 52585   | 50.122 | 52.867 | N/A | 6532 | 2.482 | 1.225    |    |
| 2 | Unknown | 1  | 17.900   | 1569115     | 48863   | 49.878 | 47.133 | N/A | 6745 | N/A   | 1.194    |    |

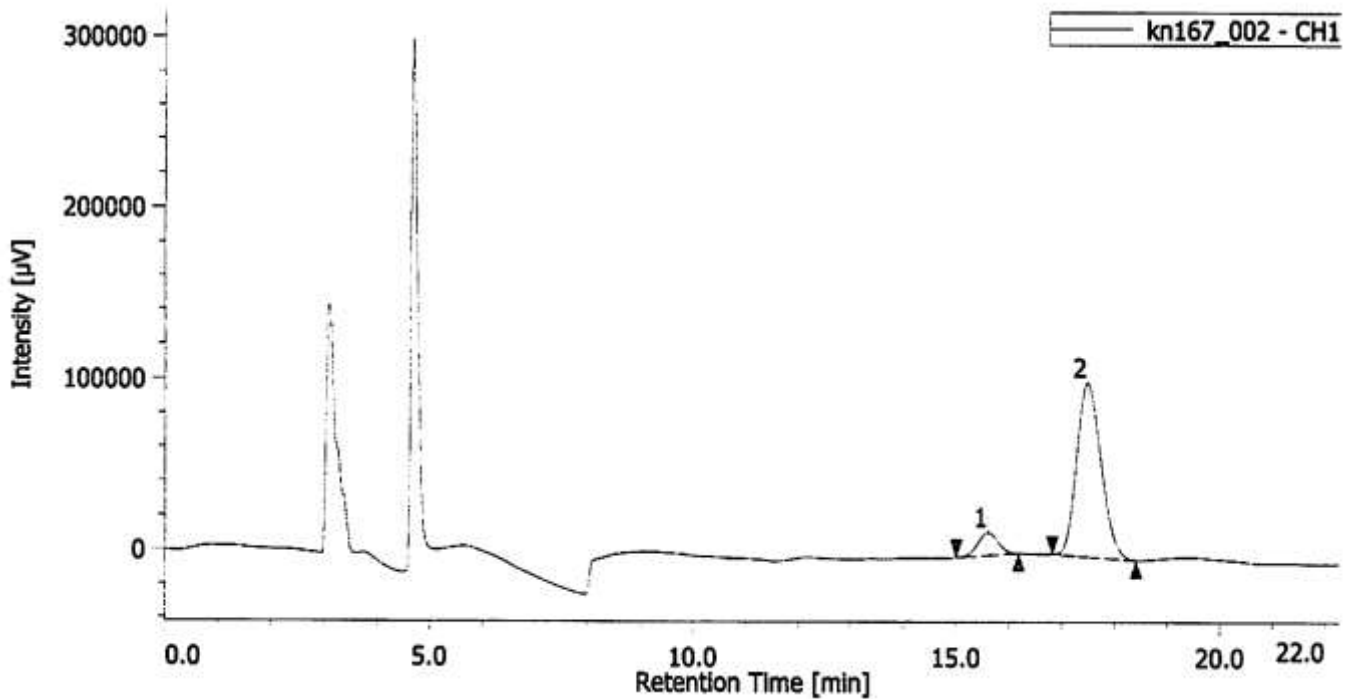

| # | ピーク名    | CH | tR [min] | 面積 [μV·sec] | 高さ [μV] | 面積%    | 高さ%    | 定量値 | NTP  | 分離度   | シンメトリー係数 | 警告 |
|---|---------|----|----------|-------------|---------|--------|--------|-----|------|-------|----------|----|
| 1 | Unknown | 1  | 15.608   | 365024      | 13389   | 10.158 | 11.641 | N/A | 7352 | 2.393 | 1.016    |    |
| 2 | Unknown | 1  | 17.483   | 3229124     | 101629  | 89.844 | 88.359 | N/A | 6884 | N/A   | 1.201    |    |

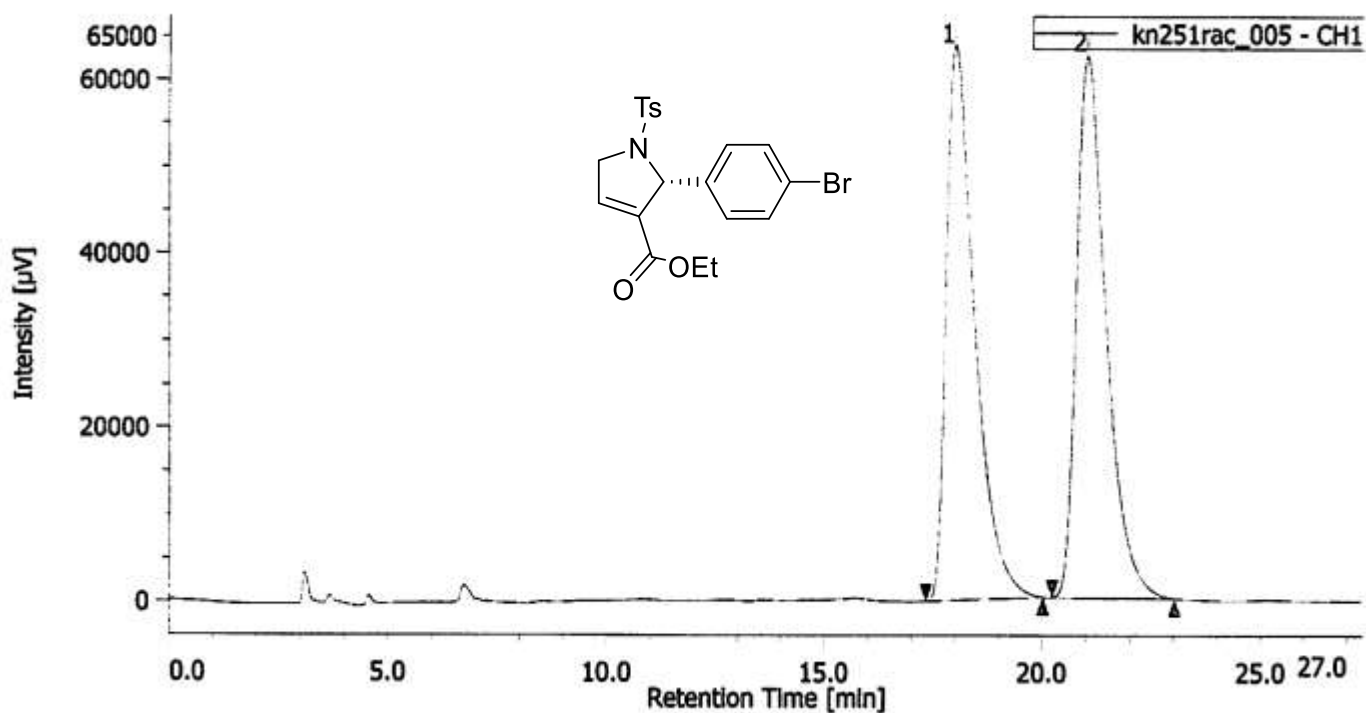

| # | ピーク名    | CH | tR [min] | 面積 [μV·sec] | 高さ [μV] | 面積%    | 高さ%    | 定量値 | NTP  | 分離度   | シンメトリー係数 | 警告 |
|---|---------|----|----------|-------------|---------|--------|--------|-----|------|-------|----------|----|
| 1 | Unknown | 1  | 18.017   | 2902351     | 63978   | 49.707 | 50.645 | N/A | 3994 | 2.587 | 1.863    |    |
| 2 | Unknown | 1  | 21.033   | 2936539     | 62349   | 50.293 | 49.355 | N/A | 4930 | N/A   | 1.583    |    |

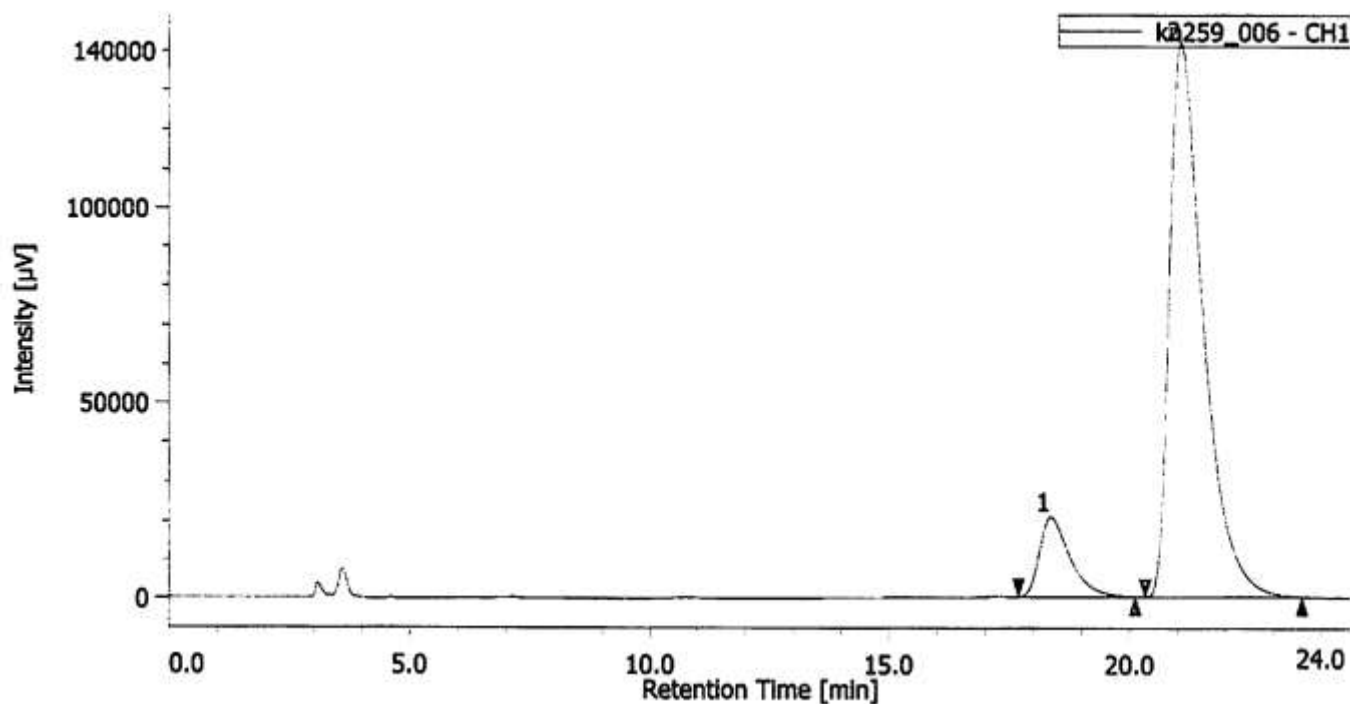

| # | ピーク名    | CH | tR [min] | 面積 [μV·sec] | 高さ [μV] | 面積%    | 高さ%    | 定量値 | NTP  | 分離度   | シンメトリー係数 | 警告 |
|---|---------|----|----------|-------------|---------|--------|--------|-----|------|-------|----------|----|
| 1 | Unknown | 1  | 18.367   | 907849      | 20829   | 11.554 | 12.799 | N/A | 4497 | 2.329 | 1.624    |    |
| 2 | Unknown | 1  | 21.075   | 6949577     | 141913  | 88.446 | 87.201 | N/A | 4649 | N/A   | 1.793    |    |

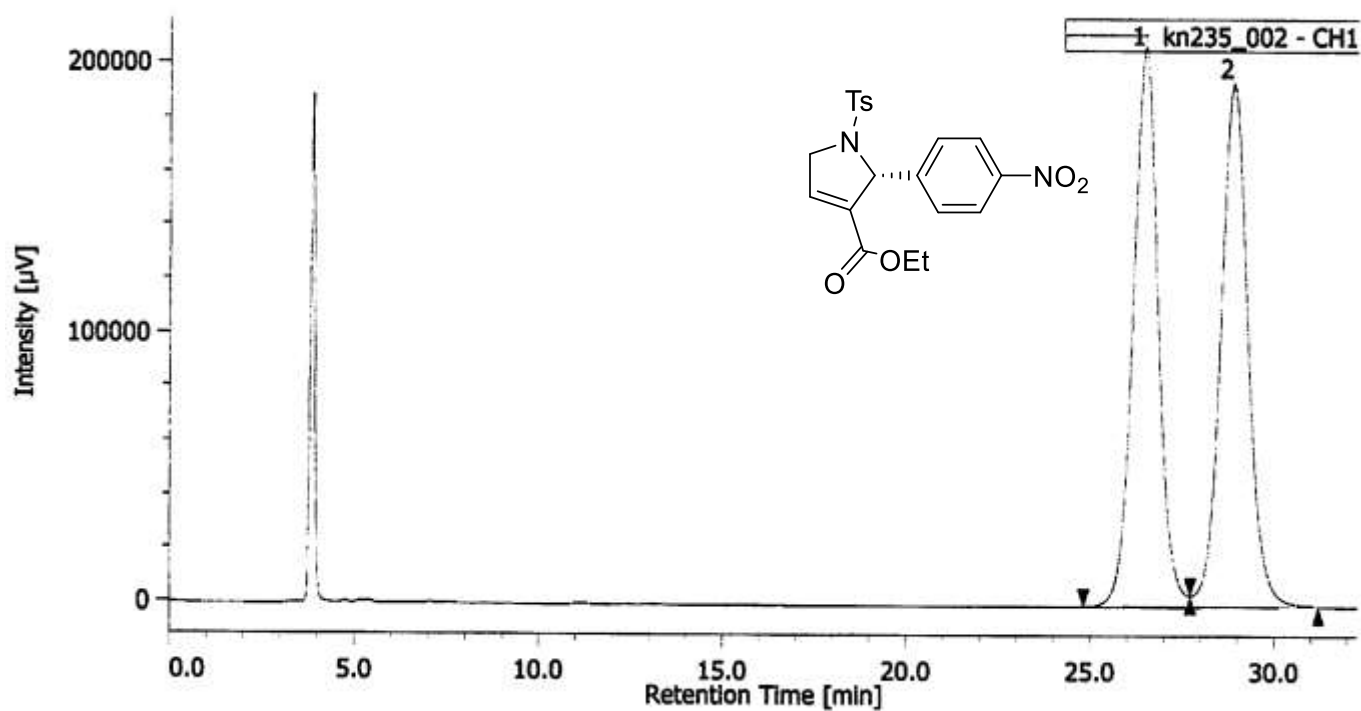

| # | ピーク名    | CH | tR [min] | 面積 [ $\mu\text{V}\cdot\text{sec}$ ] | 高さ [ $\mu\text{V}$ ] | 面積%    | 高さ%    | 定量値 | NTP  | 分離度   | シンメトリー係数 | 警告 |
|---|---------|----|----------|-------------------------------------|----------------------|--------|--------|-----|------|-------|----------|----|
| 1 | Unknown | 1  | 26.475   | 9924648                             | 207892               | 49.815 | 51.686 | N/A | 7483 | 1.898 | 1.049    |    |
| 2 | Unknown | 1  | 28.875   | 9998334                             | 194330               | 50.185 | 48.314 | N/A | 7748 | N/A   | 1.074    |    |

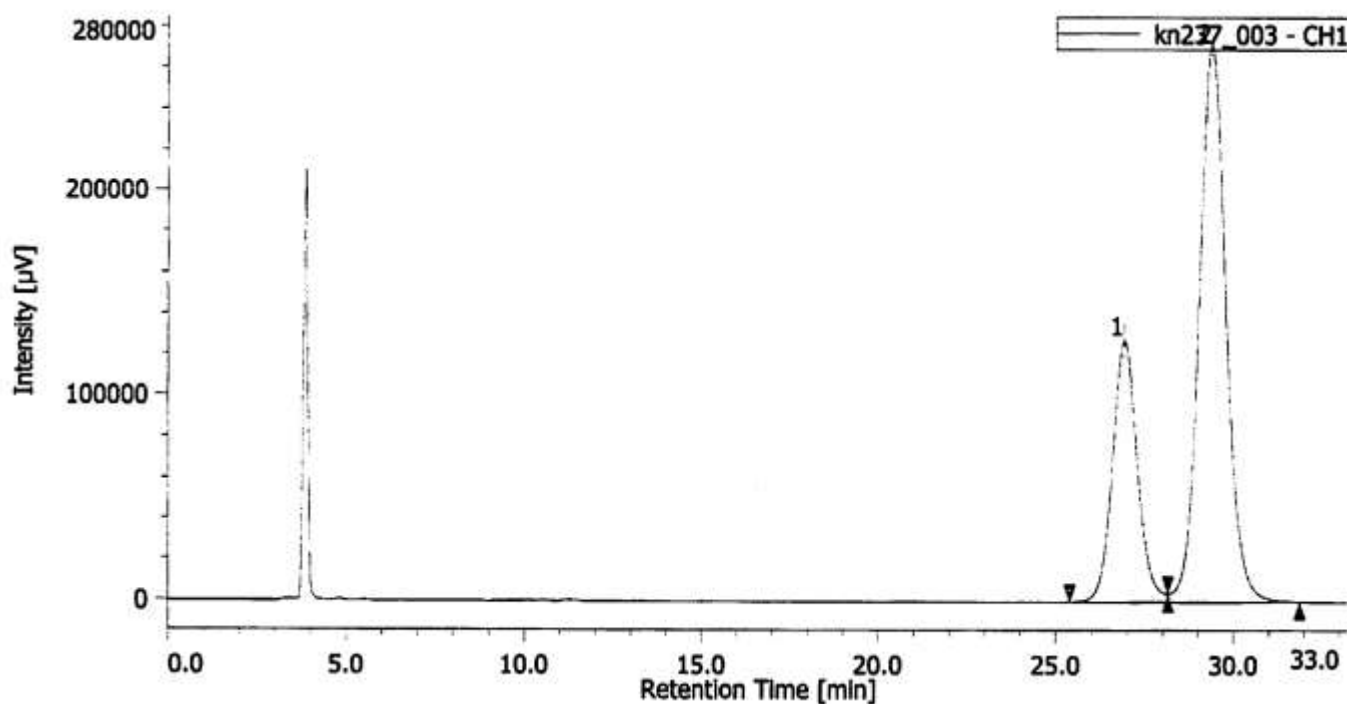

| # | ピーク名    | CH | tR [min] | 面積 [ $\mu\text{V}\cdot\text{sec}$ ] | 高さ [ $\mu\text{V}$ ] | 面積%    | 高さ%    | 定量値 | NTP  | 分離度   | シンメトリー係数 | 警告 |
|---|---------|----|----------|-------------------------------------|----------------------|--------|--------|-----|------|-------|----------|----|
| 1 | Unknown | 1  | 26.917   | 6198298                             | 127472               | 30.192 | 31.941 | N/A | 7525 | 1.900 | 1.111    |    |
| 2 | Unknown | 1  | 29.375   | 14326452                            | 271617               | 69.808 | 68.059 | N/A | 7543 | N/A   | 1.098    |    |

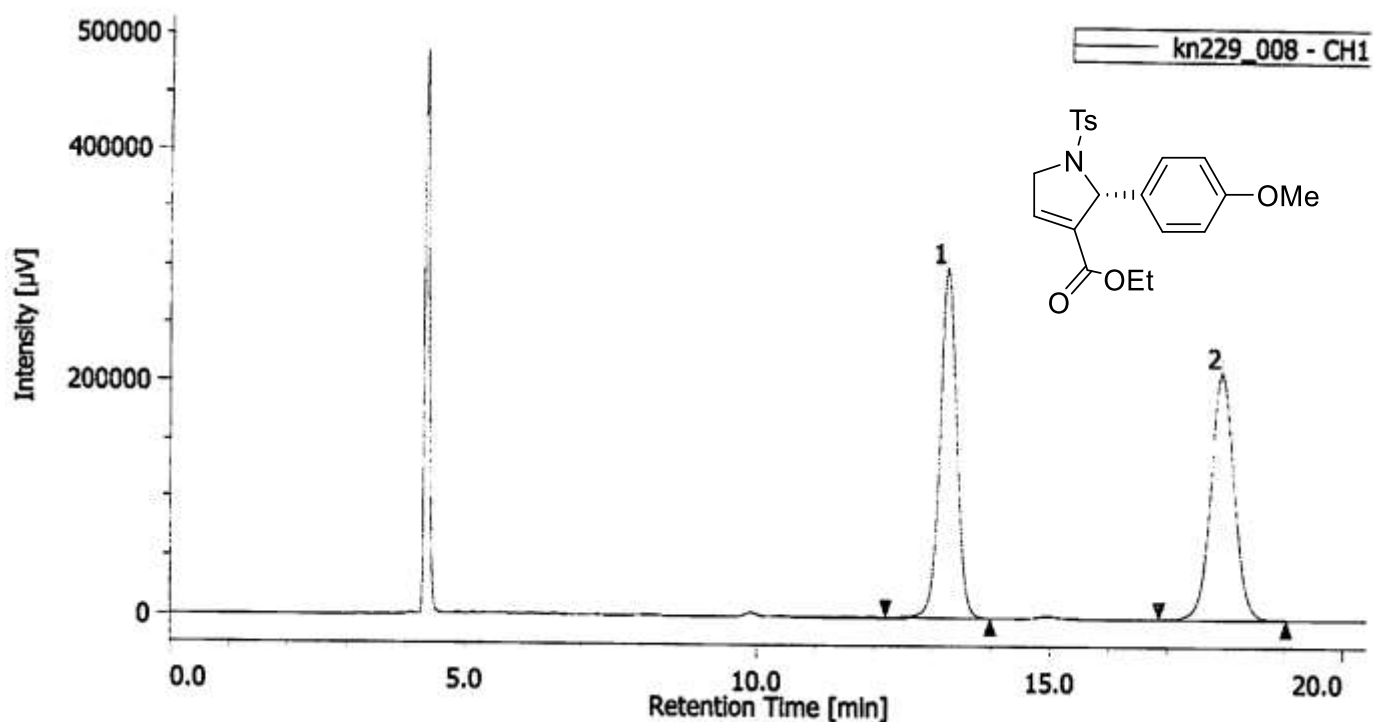

| # | ピーク名    | CH | tR [min] | 面積 [μV·sec] | 高さ [μV] | 面積%    | 高さ%    | 定量値 | NTP   | 分離度   | シンメトリー係数 | 警告 |
|---|---------|----|----------|-------------|---------|--------|--------|-----|-------|-------|----------|----|
| 1 | Unknown | 1  | 13.258   | 5976307     | 303654  | 49.797 | 58.610 | N/A | 11072 | 7.630 | 1.024    |    |
| 2 | Unknown | 1  | 17.925   | 6025084     | 214435  | 50.203 | 41.390 | N/A | 9850  | N/A   | 1.045    |    |

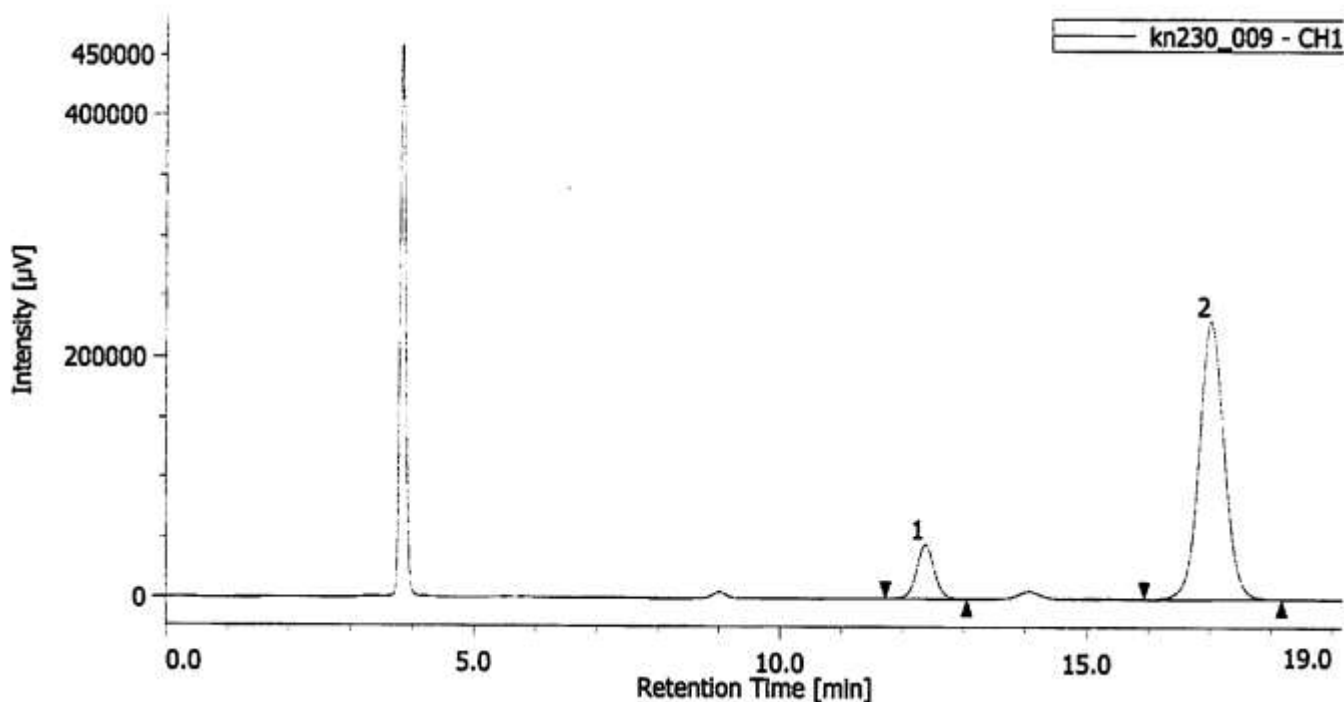

| # | ピーク名    | CH | tR [min] | 面積 [μV·sec] | 高さ [μV] | 面積%    | 高さ%    | 定量値 | NTP  | 分離度   | シンメトリー係数 | 警告 |
|---|---------|----|----------|-------------|---------|--------|--------|-----|------|-------|----------|----|
| 1 | Unknown | 1  | 12.367   | 917537      | 45905   | 12.248 | 16.568 | N/A | 9253 | 7.492 | 1.038    |    |
| 2 | Unknown | 1  | 17.017   | 6573872     | 231168  | 87.752 | 83.432 | N/A | 8683 | N/A   | 1.055    |    |



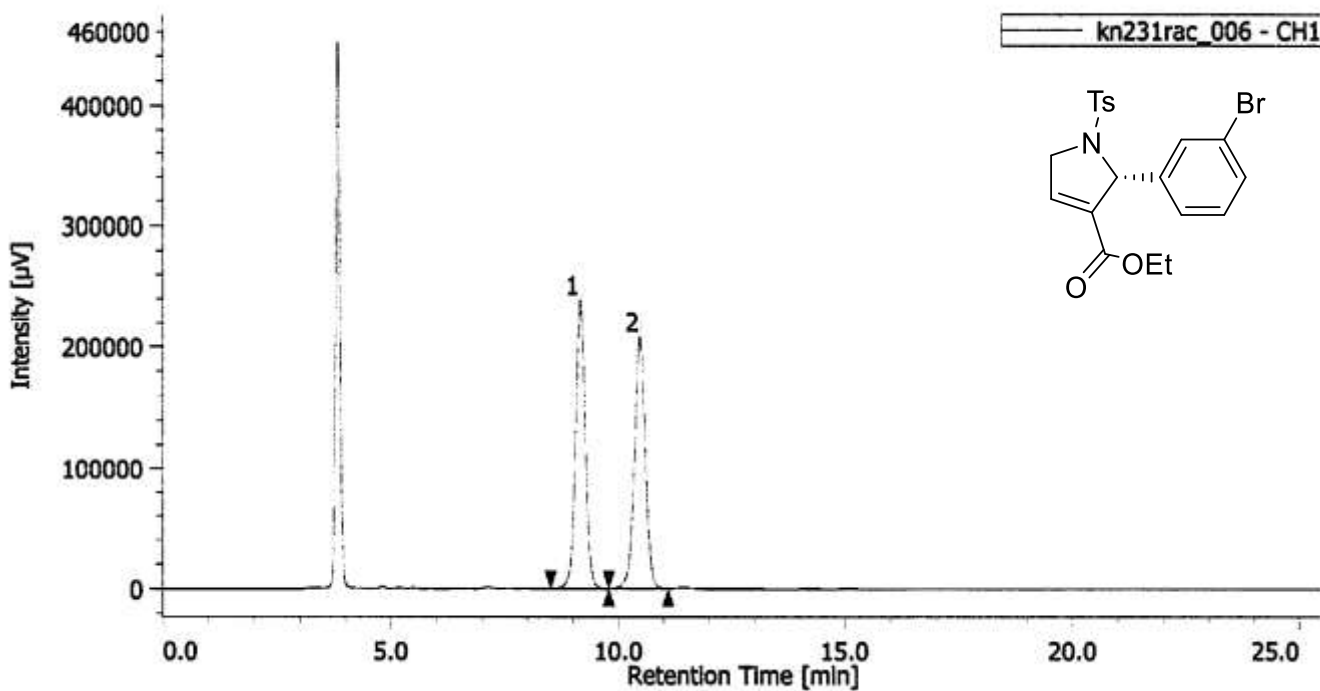

| # | ピーク名    | CH | tR [min] | 面積 [μV·sec] | 高さ [μV] | 面積%    | 高さ%    | 定量値 | NTP  | 分離度   | シンメトリー係数 | 警告 |
|---|---------|----|----------|-------------|---------|--------|--------|-----|------|-------|----------|----|
| 1 | Unknown | 1  | 9.158    | 3509253     | 239086  | 50.093 | 53.457 | N/A | 9808 | 3.288 | 1.021    |    |
| 2 | Unknown | 1  | 10.475   | 3498180     | 208163  | 49.907 | 46.543 | N/A | 9529 | N/A   | 0.973    |    |

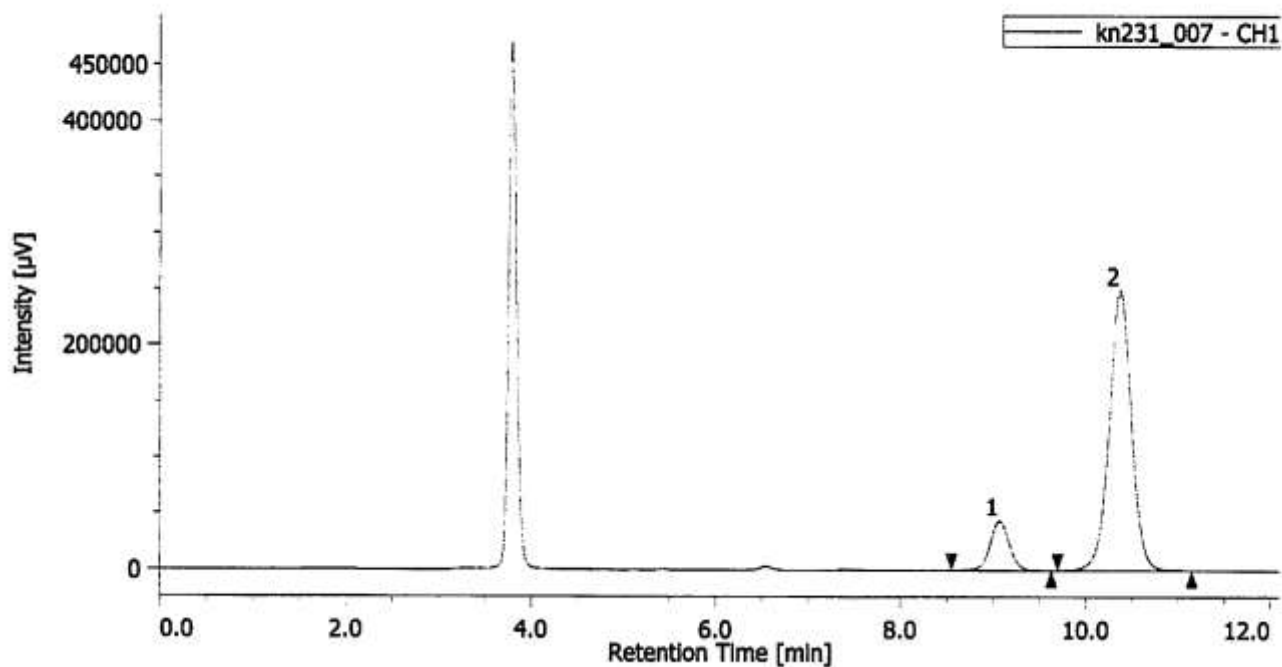

| # | ピーク名    | CH | tR [min] | 面積 [μV·sec] | 高さ [μV] | 面積%    | 高さ%    | 定量値 | NTP  | 分離度   | シンメトリー係数 | 警告 |
|---|---------|----|----------|-------------|---------|--------|--------|-----|------|-------|----------|----|
| 1 | Unknown | 1  | 9.067    | 631288      | 43662   | 13.088 | 14.888 | N/A | 9611 | 3.260 | 1.034    |    |
| 2 | Unknown | 1  | 10.367   | 4191944     | 249619  | 86.912 | 85.112 | N/A | 9307 | N/A   | 1.007    |    |

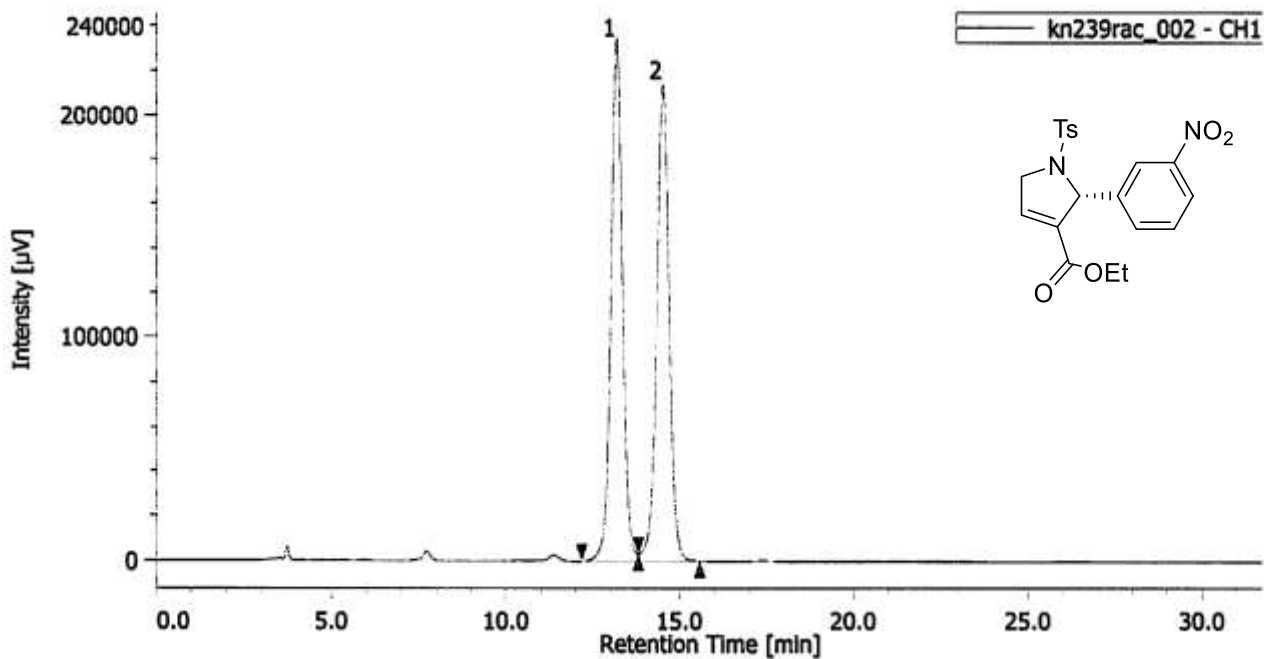

| # | ピーク名    | CH | tR [min] | 面積 [μV·sec] | 高さ [μV] | 面積%    | 高さ%    | 定量値 | NTP  | 分離度   | シンメトリー係数 | 警告 |
|---|---------|----|----------|-------------|---------|--------|--------|-----|------|-------|----------|----|
| 1 | Unknown | 1  | 13.175   | 5319440     | 234301  | 50.089 | 52.253 | N/A | 8450 | 2.241 | 1.031    |    |
| 2 | Unknown | 1  | 14.517   | 5304818     | 214096  | 49.931 | 47.747 | N/A | 8565 | N/A   | 0.995    |    |

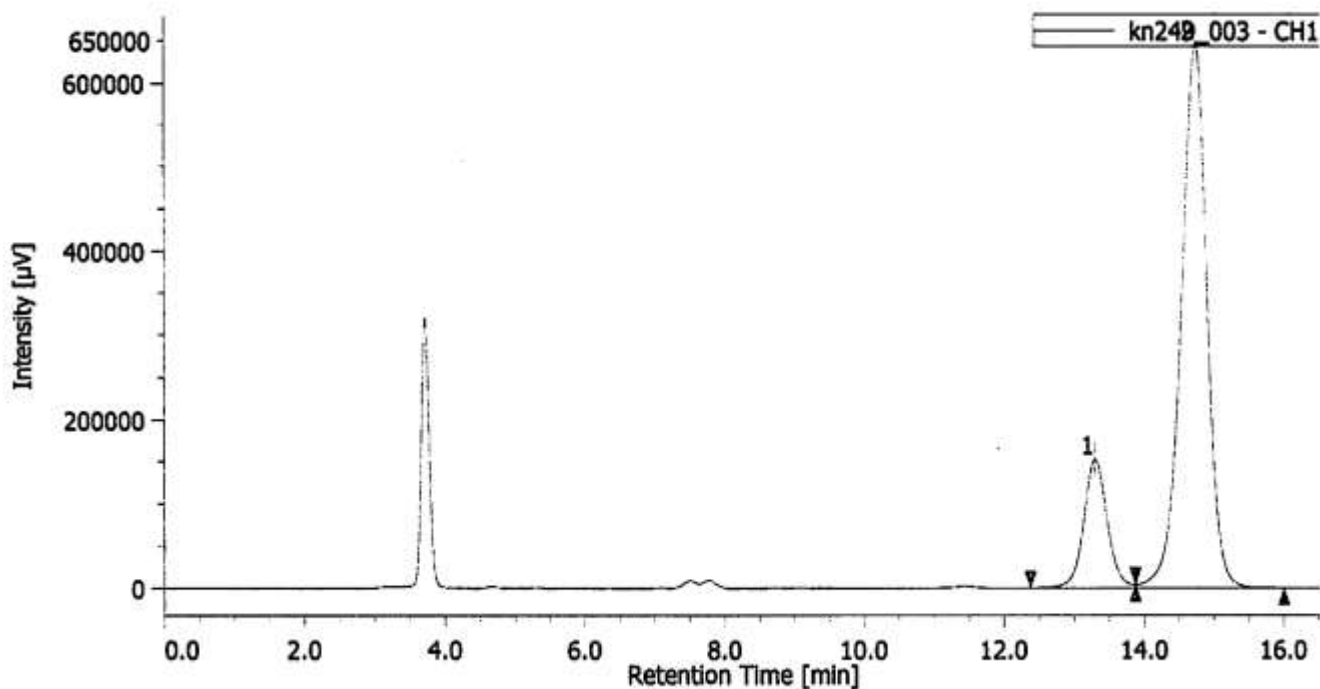

| # | ピーク名    | CH | tR [min] | 面積 [μV·sec] | 高さ [μV] | 面積%    | 高さ%    | 定量値 | NTP  | 分離度   | シンメトリー係数 | 警告 |
|---|---------|----|----------|-------------|---------|--------|--------|-----|------|-------|----------|----|
| 1 | Unknown | 1  | 13.292   | 3549396     | 151978  | 17.698 | 19.019 | N/A | 8107 | 2.335 | 1.062    |    |
| 2 | Unknown | 1  | 14.733   | 18507869    | 647122  | 82.304 | 80.981 | N/A | 8280 | N/A   | 0.917    |    |

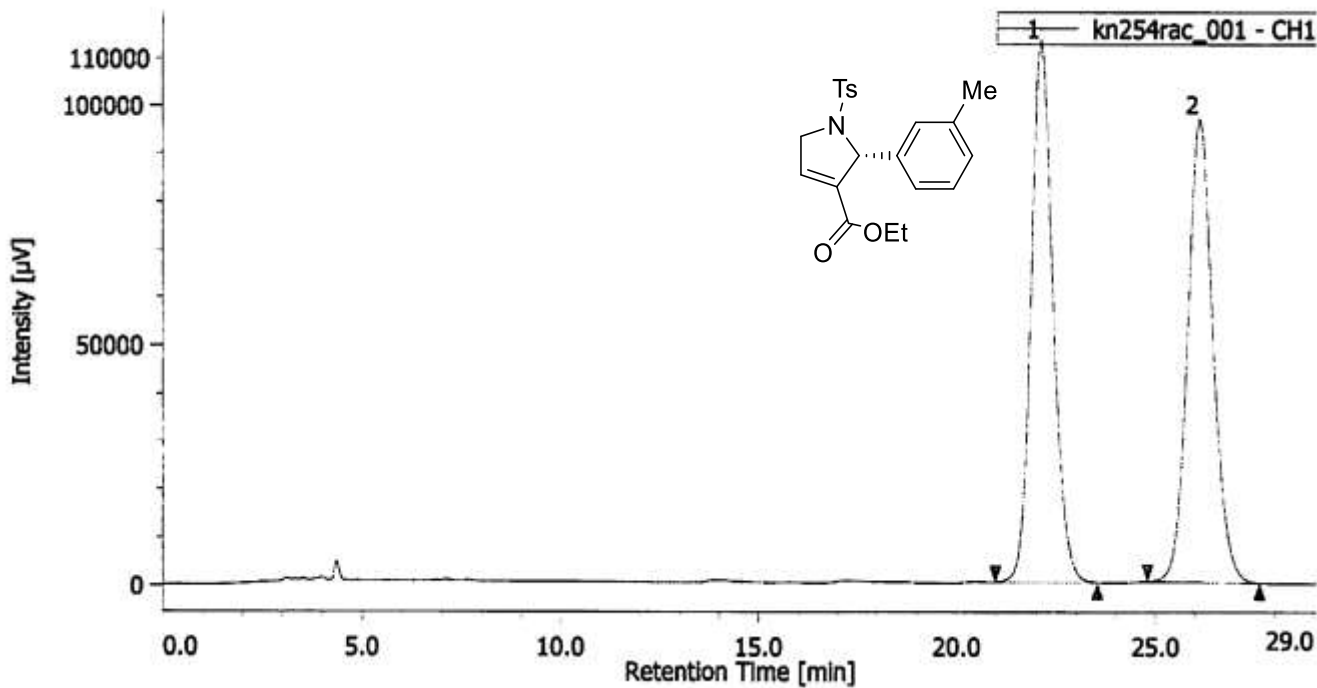

| # | ピーク名    | CH | tR [min] | 面積 [μV·sec] | 高さ [μV] | 面積%    | 高さ%    | 定量値 | NTP  | 分離度   | シンメトリー係数 | 警告 |
|---|---------|----|----------|-------------|---------|--------|--------|-----|------|-------|----------|----|
| 1 | Unknown | 1  | 22.117   | 4310372     | 113060  | 50.098 | 53.960 | N/A | 8158 | 3.773 | 1.147    |    |
| 2 | Unknown | 1  | 26.108   | 4293512     | 96467   | 49.902 | 46.040 | N/A | 8361 | N/A   | 1.097    |    |

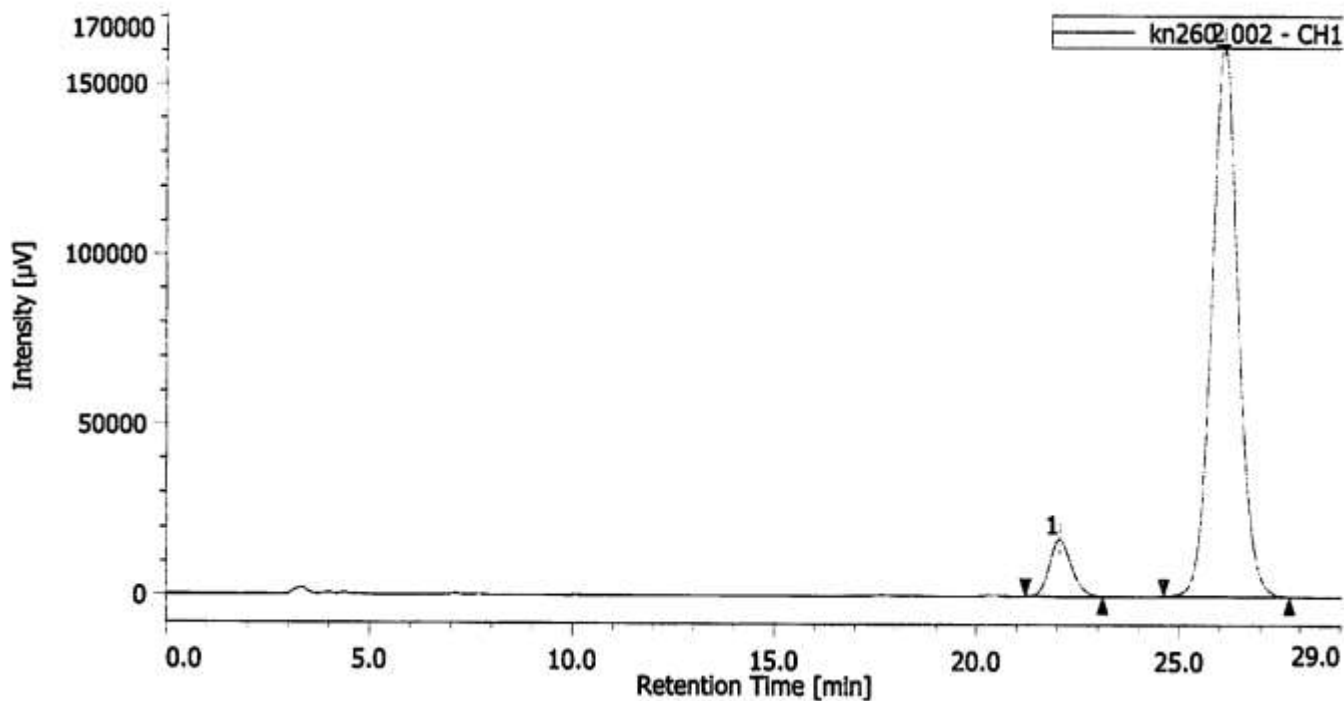

| # | ピーク名    | CH | tR [min] | 面積 [μV·sec] | 高さ [μV] | 面積%    | 高さ%    | 定量値 | NTP  | 分離度   | シンメトリー係数 | 警告 |
|---|---------|----|----------|-------------|---------|--------|--------|-----|------|-------|----------|----|
| 1 | Unknown | 1  | 22.042   | 642925      | 18997   | 8.004  | 9.462  | N/A | 8018 | 3.786 | 1.172    |    |
| 2 | Unknown | 1  | 26.100   | 7389528     | 162645  | 91.996 | 90.538 | N/A | 8034 | N/A   | 1.075    |    |

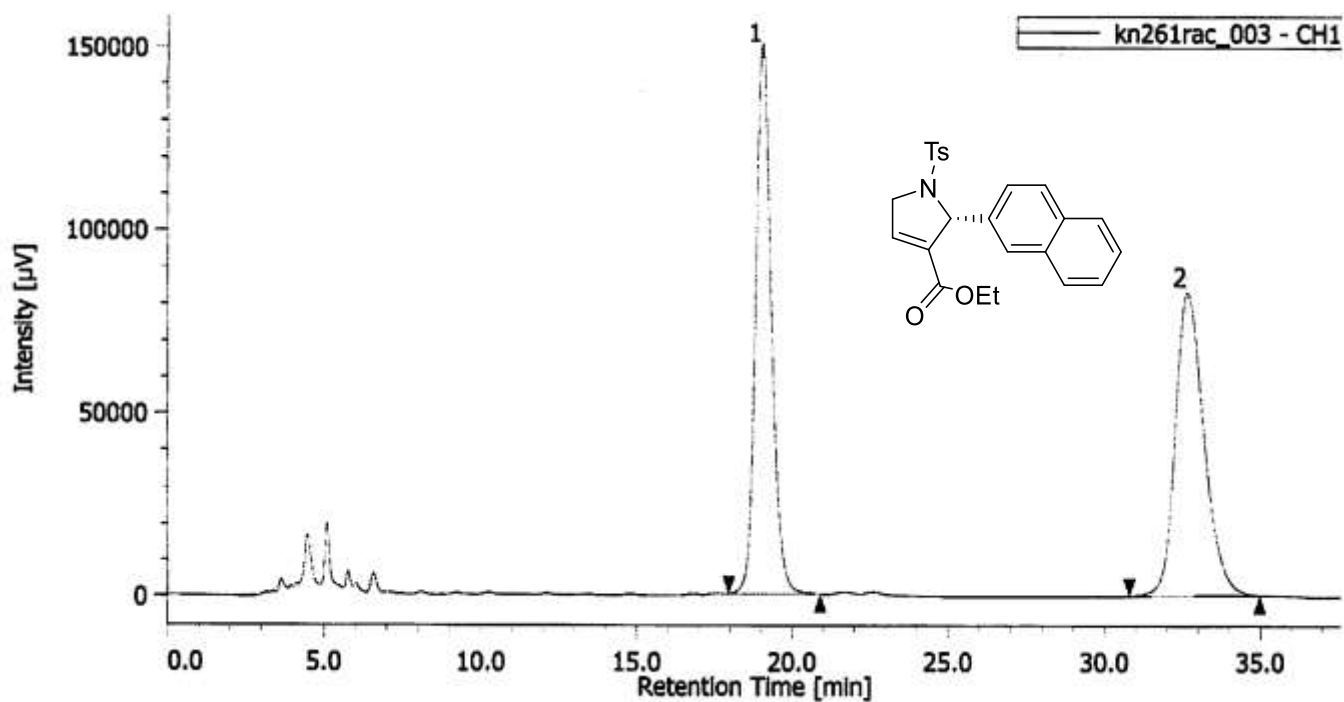

| # | ピーク名    | CH | tR [min] | 面積 [ $\mu\text{V}\cdot\text{sec}$ ] | 高さ [ $\mu\text{V}$ ] | 面積%    | 高さ%    | 定量値 | NTP  | 分離度    | シンメトリー係数 | 警告 |
|---|---------|----|----------|-------------------------------------|----------------------|--------|--------|-----|------|--------|----------|----|
| 1 | Unknown | 1  | 19.033   | 5320905                             | 150414               | 49.962 | 64.405 | N/A | 7152 | 10.705 | 1.218    |    |
| 2 | Unknown | 1  | 32.642   | 5328980                             | 83130                | 50.038 | 35.595 | N/A | 6270 | N/A    | 1.281    |    |

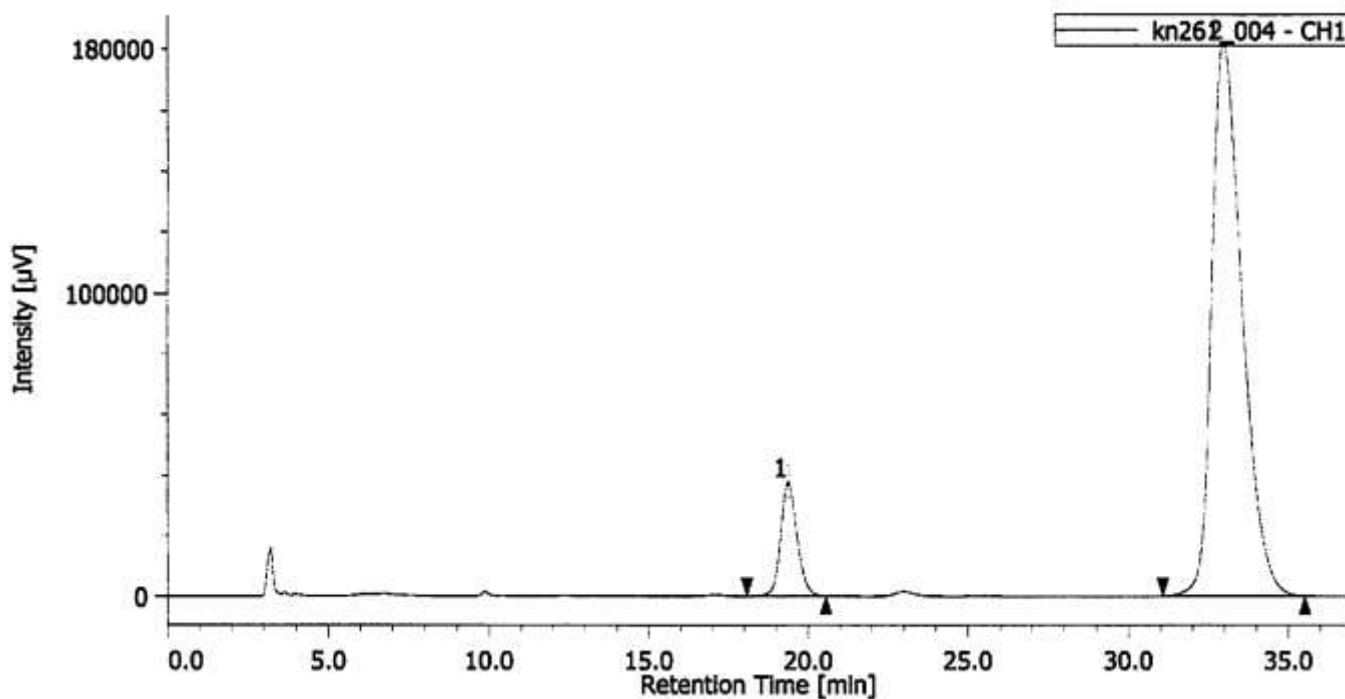

| # | ピーク名    | CH | tR [min] | 面積 [ $\mu\text{V}\cdot\text{sec}$ ] | 高さ [ $\mu\text{V}$ ] | 面積%    | 高さ%    | 定量値 | NTP  | 分離度    | シンメトリー係数 | 警告 |
|---|---------|----|----------|-------------------------------------|----------------------|--------|--------|-----|------|--------|----------|----|
| 1 | Unknown | 1  | 19.367   | 1339881                             | 37800                | 9.980  | 17.169 | N/A | 7364 | 10.398 | 1.159    |    |
| 2 | Unknown | 1  | 32.975   | 12072191                            | 182365               | 80.010 | 82.831 | N/A | 5869 | N/A    | 1.411    |    |

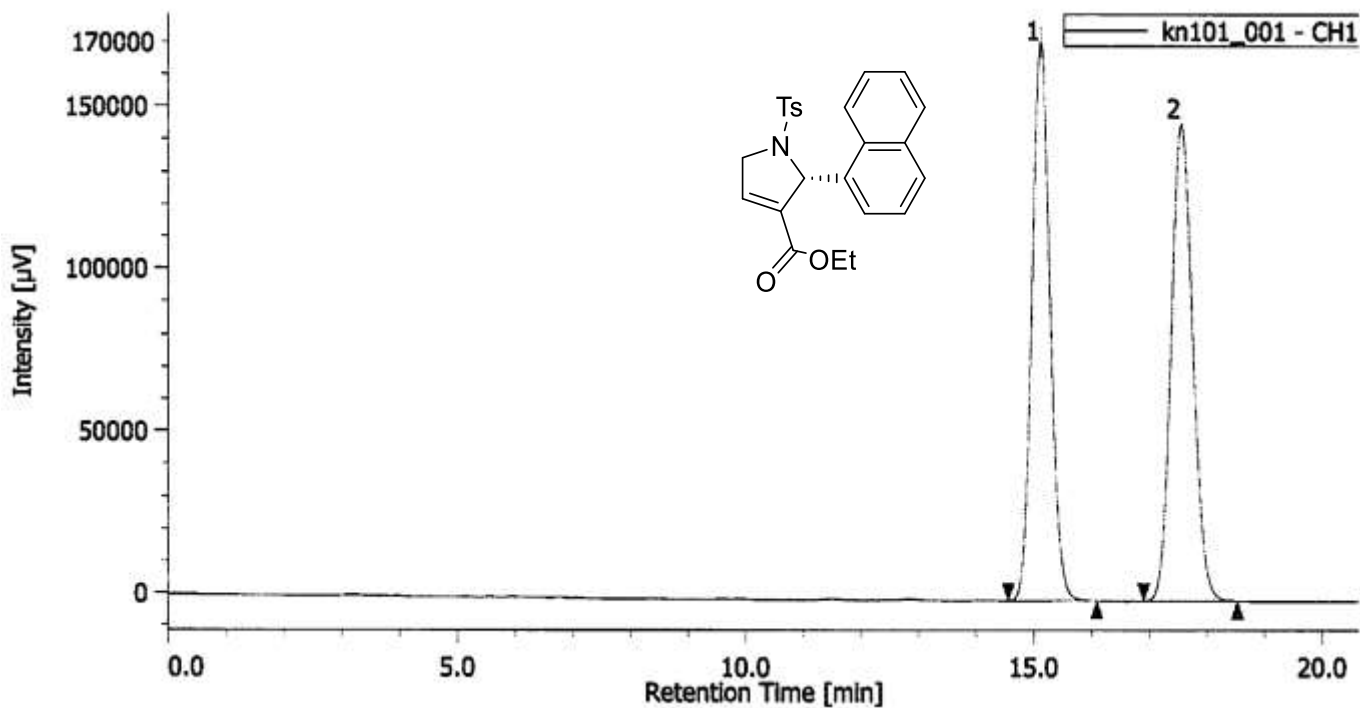

| # | ピーク名    | CH | tR [min] | 面積 [ $\mu\text{V}\cdot\text{sec}$ ] | 高さ [ $\mu\text{V}$ ] | 面積%    | 高さ%    | 定量値 | NTP   | 分離度   | シンメトリ係数 | 警告 |
|---|---------|----|----------|-------------------------------------|----------------------|--------|--------|-----|-------|-------|---------|----|
| 1 | Unknown | 1  | 15.108   | 3829515                             | 172732               | 49.953 | 53.958 | N/A | 10752 | 3.846 | 1.119   |    |
| 2 | Unknown | 1  | 17.542   | 3836741                             | 147393               | 50.047 | 46.042 | N/A | 10468 | N/A   | 1.122   |    |

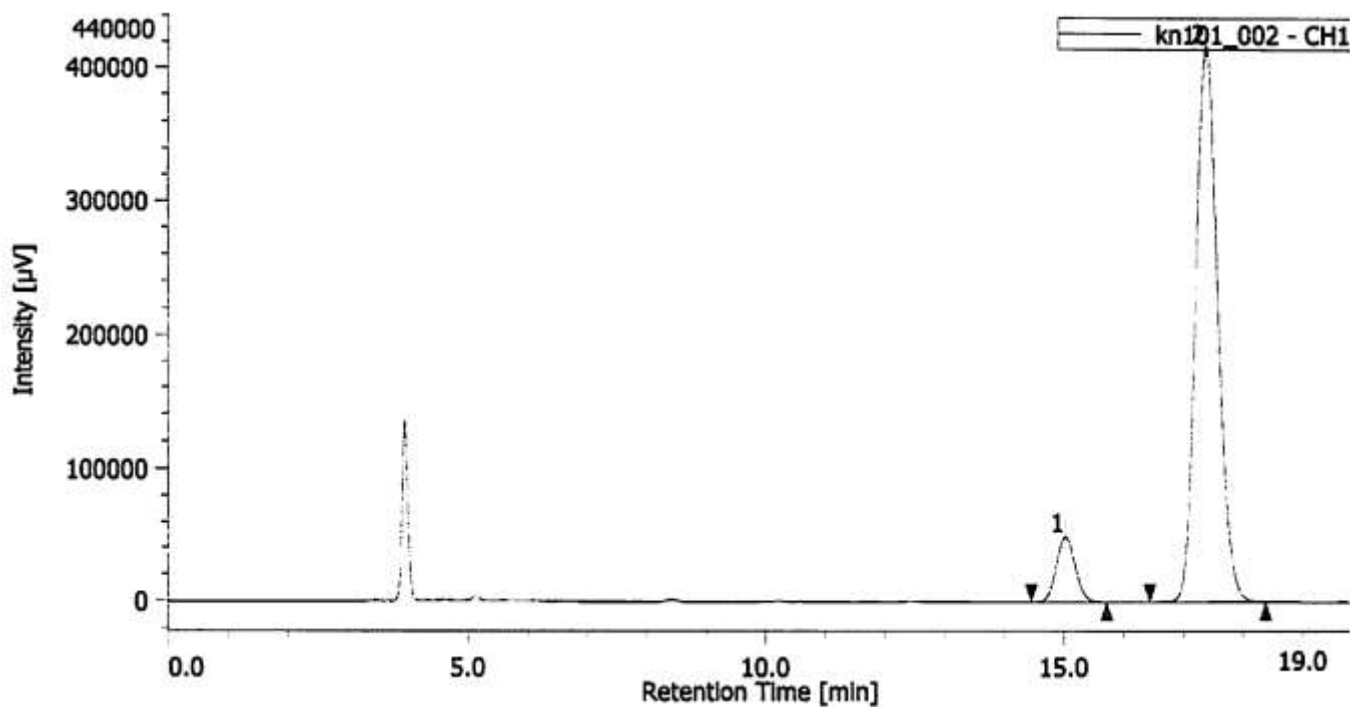

| # | ピーク名    | CH | tR [min] | 面積 [ $\mu\text{V}\cdot\text{sec}$ ] | 高さ [ $\mu\text{V}$ ] | 面積%    | 高さ%    | 定量値 | NTP   | 分離度   | シンメトリ係数 | 警告 |
|---|---------|----|----------|-------------------------------------|----------------------|--------|--------|-----|-------|-------|---------|----|
| 1 | Unknown | 1  | 15.025   | 1078761                             | 49570                | 9.018  | 10.542 | N/A | 11015 | 3.745 | 1.083   |    |
| 2 | Unknown | 1  | 17.367   | 10883897                            | 420654               | 90.982 | 89.458 | N/A | 10399 | N/A   | 1.171   |    |

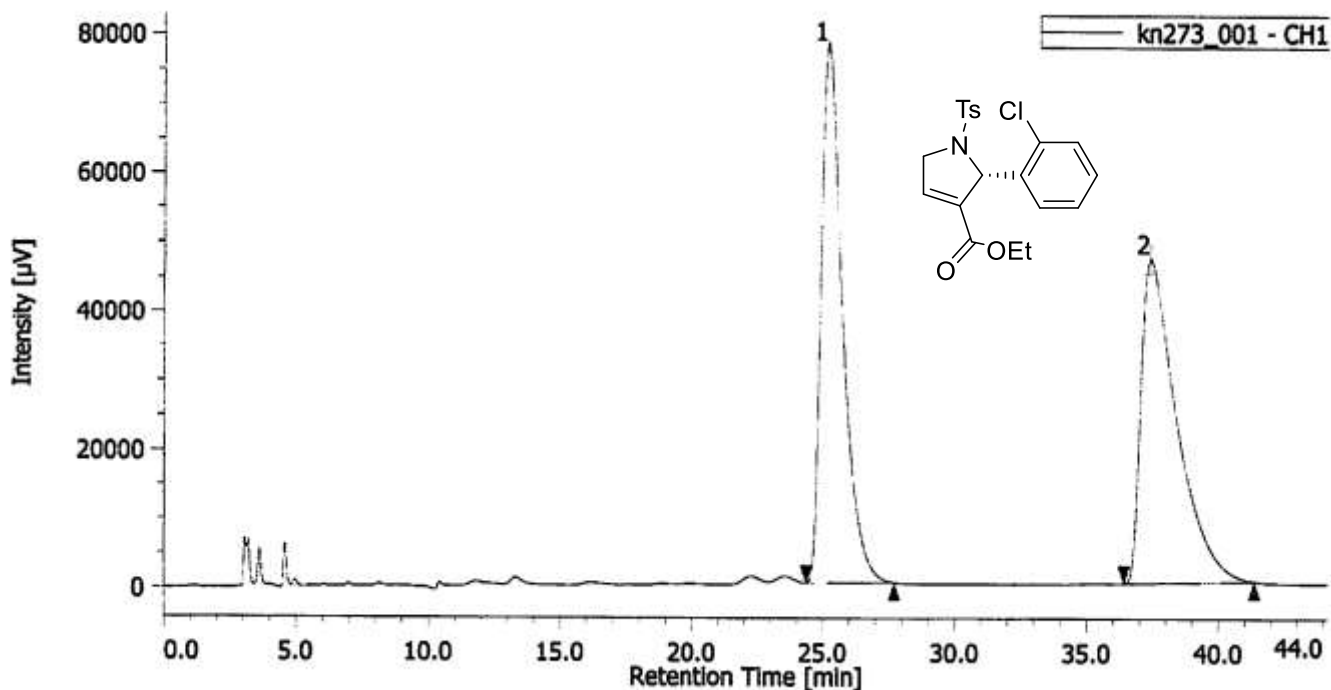

| # | ピーク名    | CH | tR [min] | 面積: [μV·sec] | 高さ: [μV] | 面積%    | 高さ%    | 定量値 | NTP  | 分離度   | シンメトリー係数 | 警告 |
|---|---------|----|----------|--------------|----------|--------|--------|-----|------|-------|----------|----|
| 1 | Unknown | 1  | 25.175   | 4458177      | 78056    | 50.014 | 82.443 | N/A | 4784 | 6.346 | 1.809    |    |
| 2 | Unknown | 1  | 37.400   | 4455756      | 46949    | 49.986 | 37.557 | N/A | 3883 | N/A   | 2.407    |    |

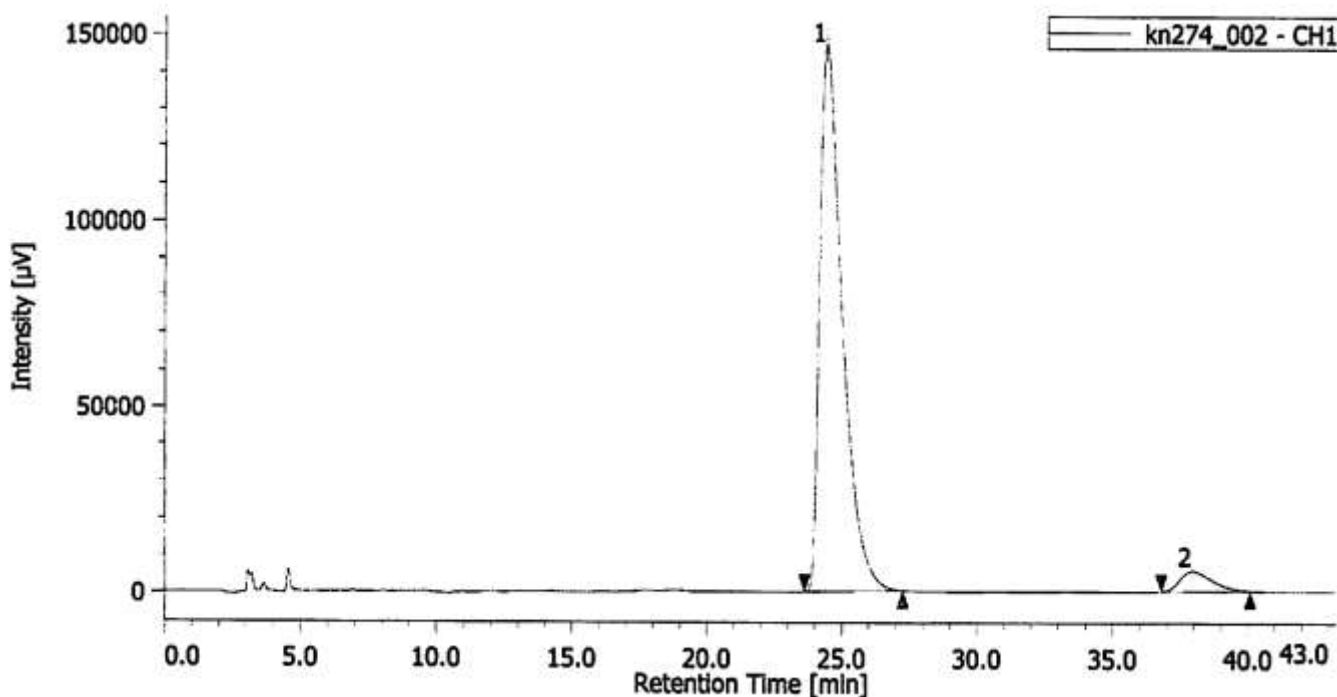

| # | ピーク名    | CH | tR [min] | 面積: [μV·sec] | 高さ: [μV] | 面積%    | 高さ%    | 定量値 | NTP  | 分離度   | シンメトリー係数 | 警告 |
|---|---------|----|----------|--------------|----------|--------|--------|-----|------|-------|----------|----|
| 1 | Unknown | 1  | 24.408   | 8566828      | 147383   | 94.922 | 98.382 | N/A | 4403 | 7.394 | 2.087    |    |
| 2 | Unknown | 1  | 37.933   | 458263       | 5532     | 5.078  | 3.618  | N/A | 4770 | N/A   | 1.468    |    |

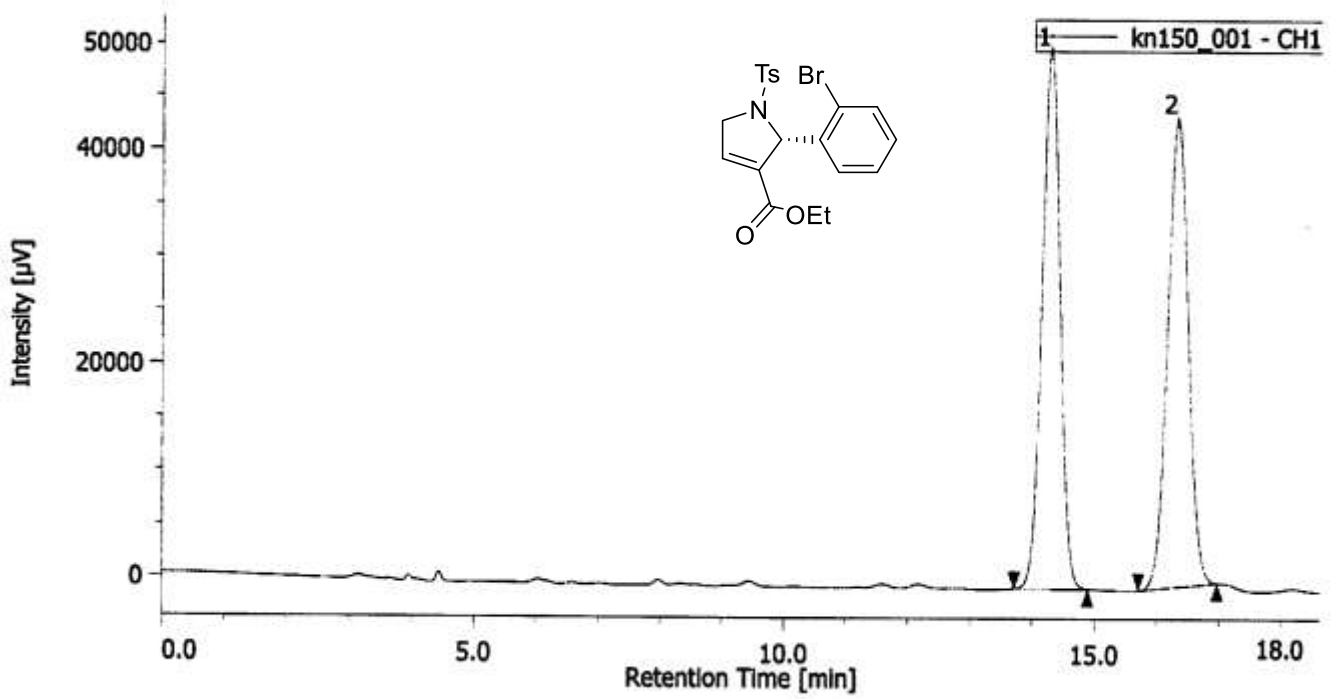

| # | ピーク名    | CH | tR [min] | 面積 [μV·sec] | 高さ [μV] | 面積%    | 高さ%    | 定量値 | NTP   | 分離度   | シンメトリー係数 | 警告 |
|---|---------|----|----------|-------------|---------|--------|--------|-----|-------|-------|----------|----|
| 1 | Unknown | 1  | 14.283   | 1021684     | 50840   | 50.148 | 53.641 | N/A | 11653 | 3.598 | 1.022    |    |
| 2 | Unknown | 1  | 16.325   | 1015669     | 43937   | 49.852 | 48.359 | N/A | 11512 | N/A   | 1.044    |    |

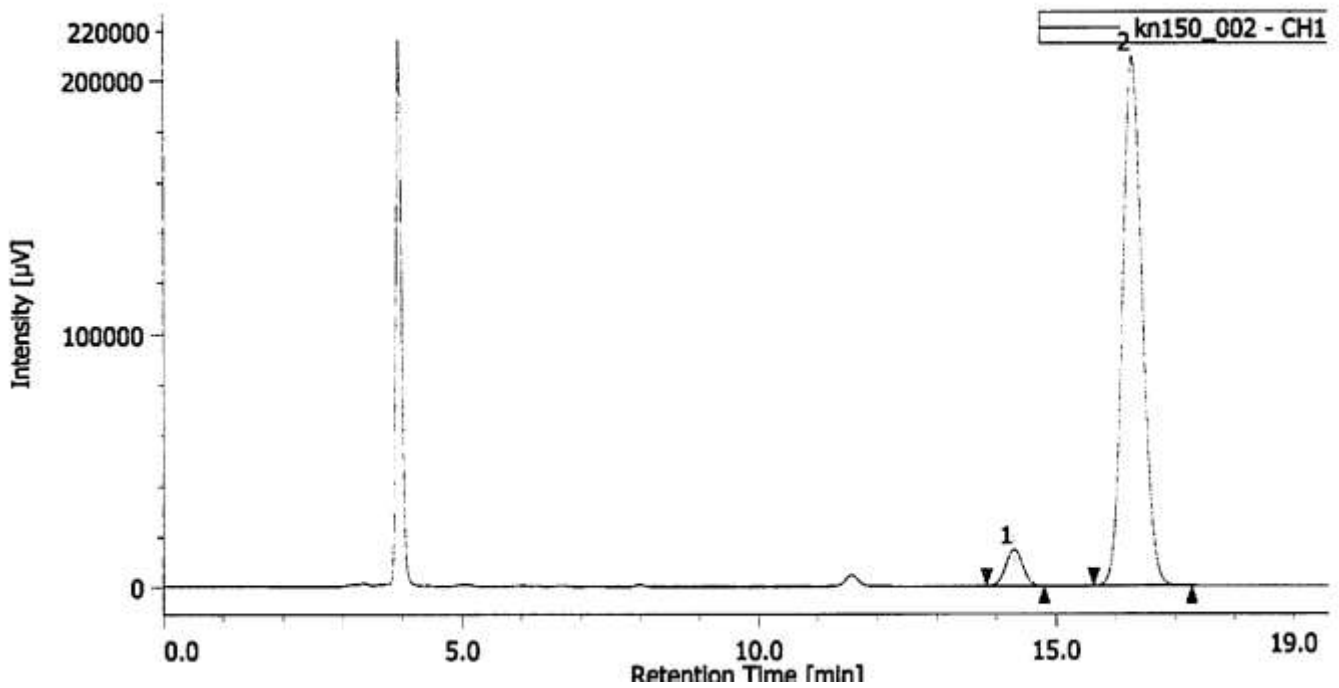

| # | ピーク名    | CH | tR [min] | 面積 [μV·sec] | 高さ [μV] | 面積%    | 高さ%    | 定量値 | NTP   | 分離度   | シンメトリー係数 | 警告 |
|---|---------|----|----------|-------------|---------|--------|--------|-----|-------|-------|----------|----|
| 1 | Unknown | 1  | 14.300   | 291941      | 14830   | 5.635  | 6.617  | N/A | 12013 | 3.484 | 1.008    |    |
| 2 | Unknown | 1  | 16.275   | 4888769     | 209272  | 94.365 | 93.383 | N/A | 11209 | N/A   | 1.103    |    |

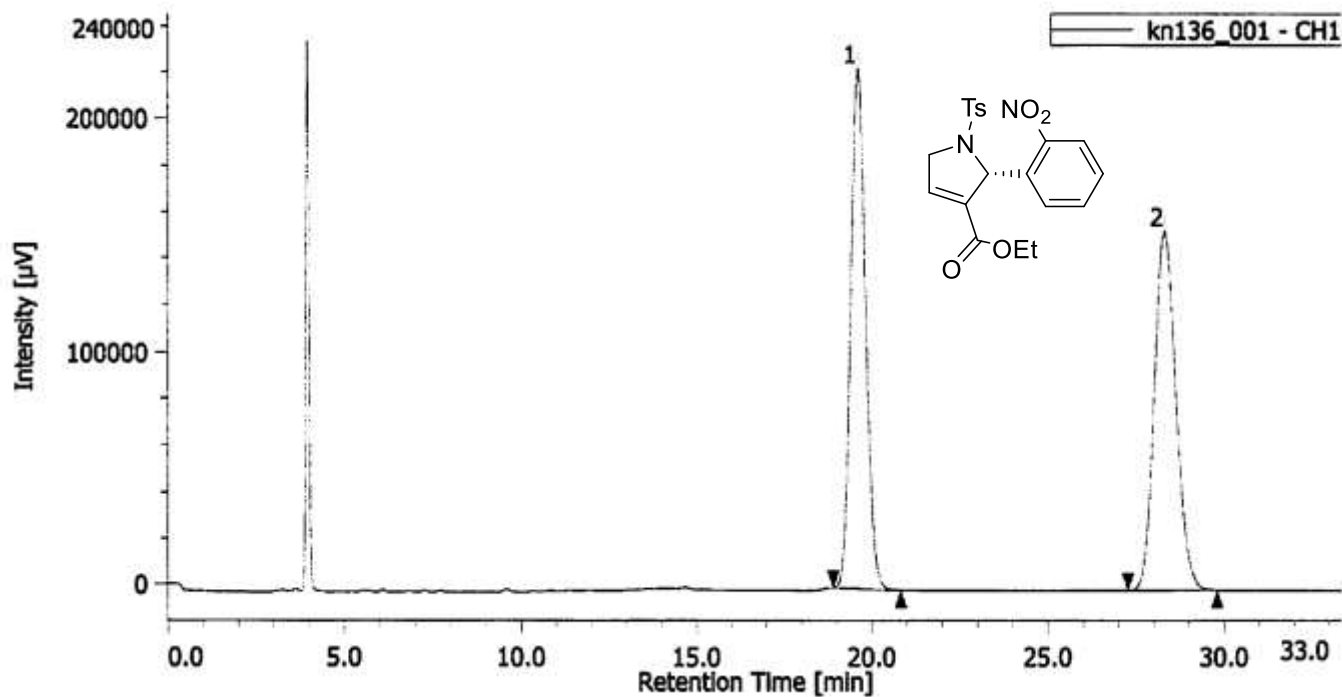

| # | ピーク名    | CH | tR [min] | 面積 [μV·sec] | 高さ [μV] | 面積%    | 高さ%    | 定量値 | NTP   | 分離度   | シンメトリー係数 | 警告 |
|---|---------|----|----------|-------------|---------|--------|--------|-----|-------|-------|----------|----|
| 1 | Unknown | 1  | 19.592   | 6557252     | 223460  | 49.835 | 59.168 | N/A | 10312 | 9.191 | 1.124    |    |
| 2 | Unknown | 1  | 28.292   | 6600622     | 154208  | 50.165 | 40.832 | N/A | 10092 | N/A   | 1.136    |    |

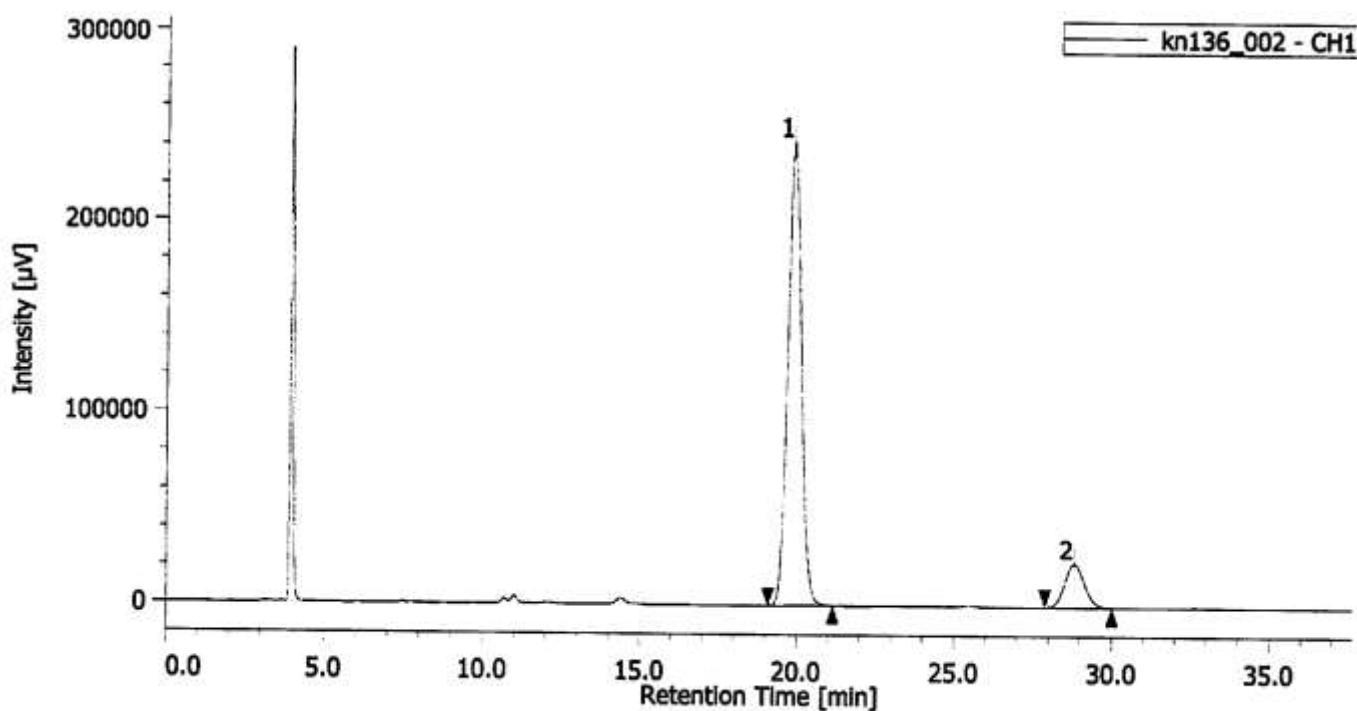

| # | ピーク名    | CH | tR [min] | 面積 [μV·sec] | 高さ [μV] | 面積%    | 高さ%    | 定量値 | NTP   | 分離度   | シンメトリー係数 | 警告 |
|---|---------|----|----------|-------------|---------|--------|--------|-----|-------|-------|----------|----|
| 1 | Unknown | 1  | 19.867   | 7275855     | 242980  | 88.010 | 91.382 | N/A | 10229 | 9.305 | 1.123    |    |
| 2 | Unknown | 1  | 28.800   | 991180      | 22974   | 11.990 | 8.638  | N/A | 10221 | N/A   | 1.106    |    |



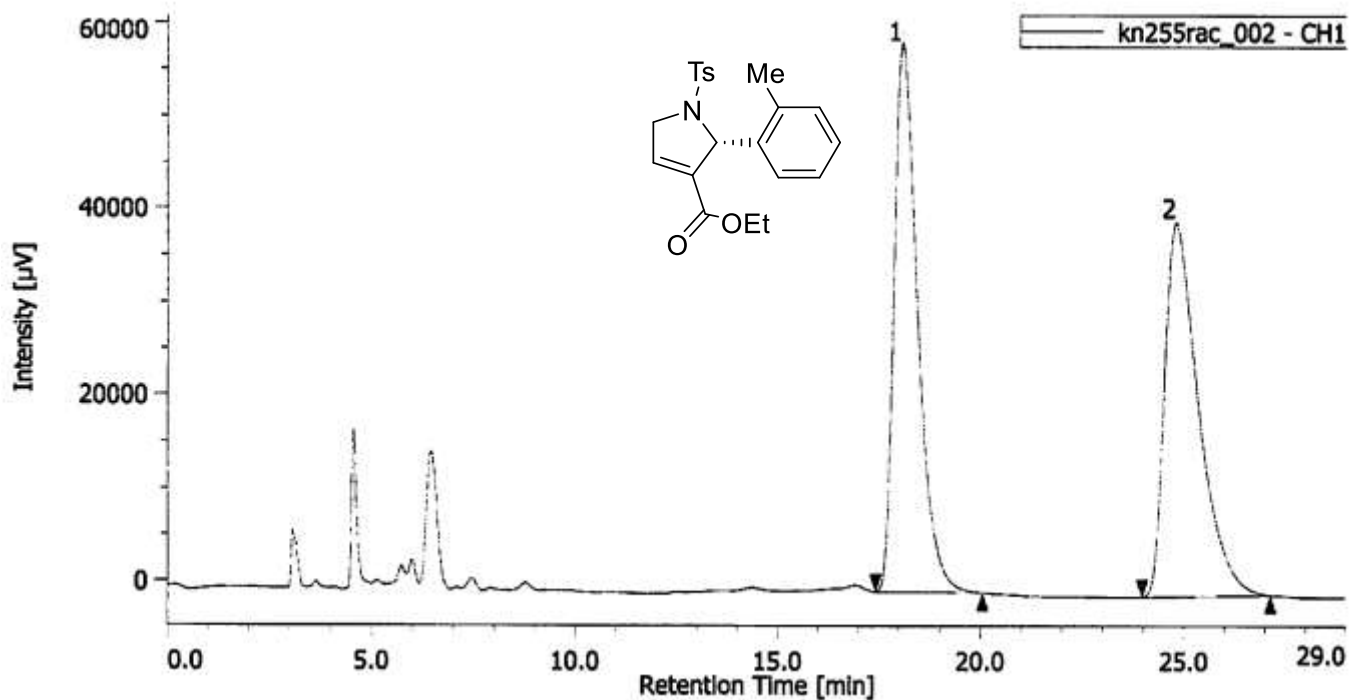

| # | ピーク名    | CH | tR [min] | 面積 [μV·sec] | 高さ [μV] | 面積%    | 高さ%    | 定量値 | NTP  | 分離度   | シンメトリー係数 | 警告 |
|---|---------|----|----------|-------------|---------|--------|--------|-----|------|-------|----------|----|
| 1 | Unknown | 1  | 18.092   | 2385358     | 58951   | 50.227 | 59.581 | N/A | 4984 | 5.321 | 1.551    |    |
| 2 | Unknown | 1  | 24.800   | 2343997     | 40026   | 49.773 | 40.439 | N/A | 4388 | N/A   | 1.783    |    |

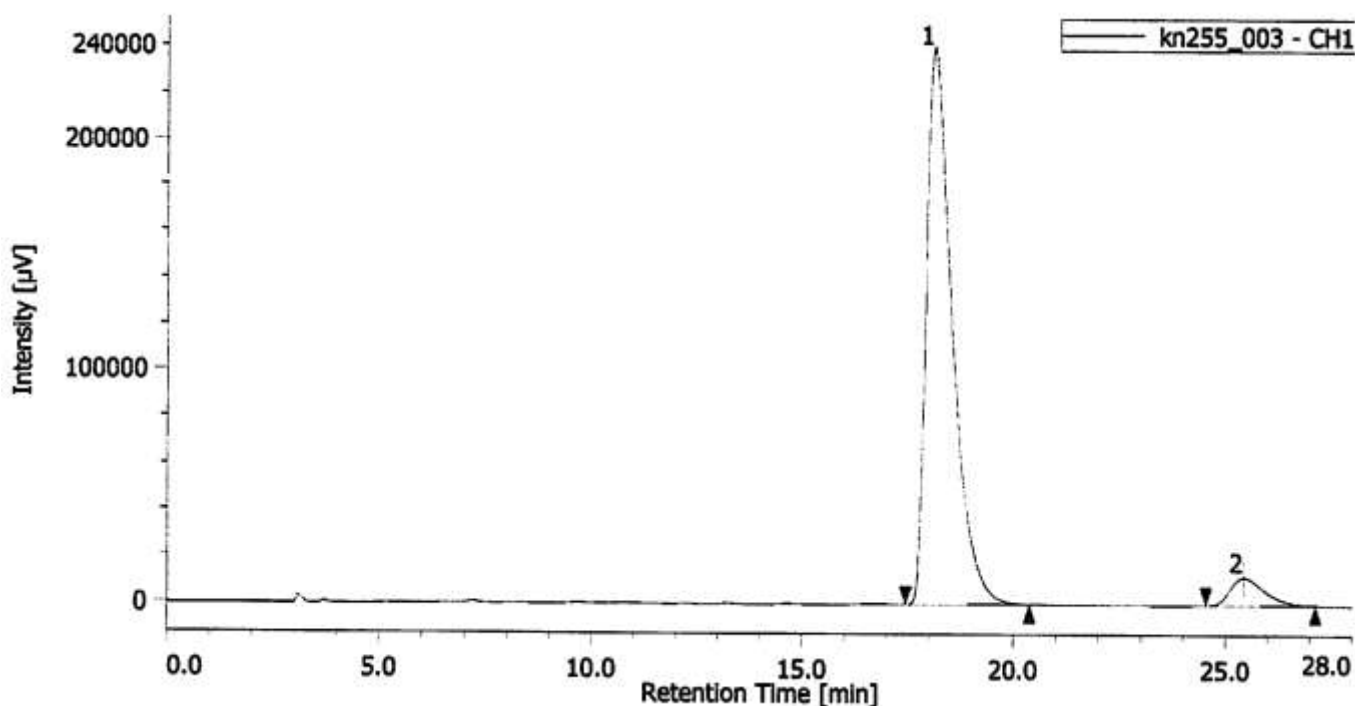

| # | ピーク名    | CH | tR [min] | 面積 [μV·sec] | 高さ [μV] | 面積%    | 高さ%    | 定量値 | NTP  | 分離度   | シンメトリー係数 | 警告 |
|---|---------|----|----------|-------------|---------|--------|--------|-----|------|-------|----------|----|
| 1 | Unknown | 1  | 18.108   | 10157053    | 240529  | 93.779 | 95.329 | N/A | 4555 | 5.723 | 1.951    |    |
| 2 | Unknown | 1  | 25.433   | 673833      | 11787   | 6.221  | 4.671  | N/A | 4841 | N/A   | 1.458    |    |

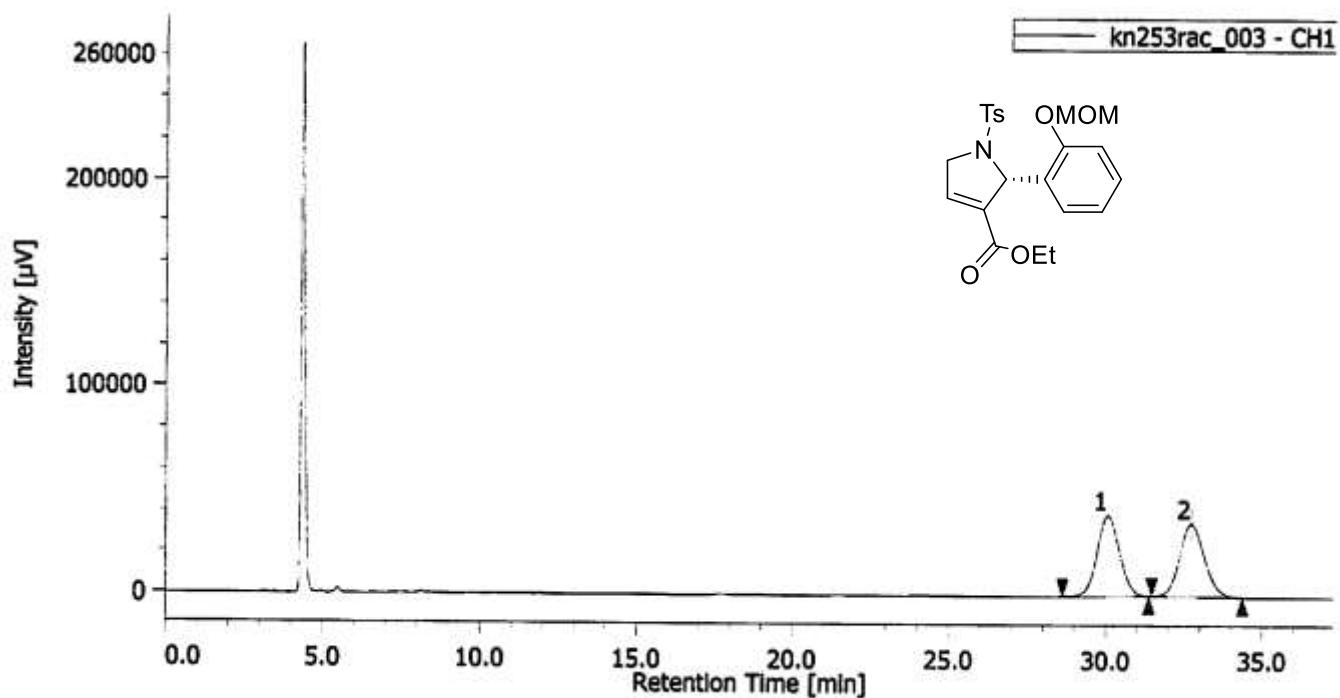

| # | ピーク名    | CH | tR [min] | 面積 [μV·sec] | 高さ [μV] | 面積%    | 高さ%    | 定量値 | NTP  | 分離度   | シンメトリー係数 | 警告 |
|---|---------|----|----------|-------------|---------|--------|--------|-----|------|-------|----------|----|
| 1 | Unknown | 1  | 30.067   | 1932979     | 39200   | 50.179 | 52.732 | N/A | 8852 | 1.977 | 1.049    |    |
| 2 | Unknown | 1  | 32.725   | 1919220     | 35137   | 49.821 | 47.268 | N/A | 8516 | N/A   | 1.113    |    |

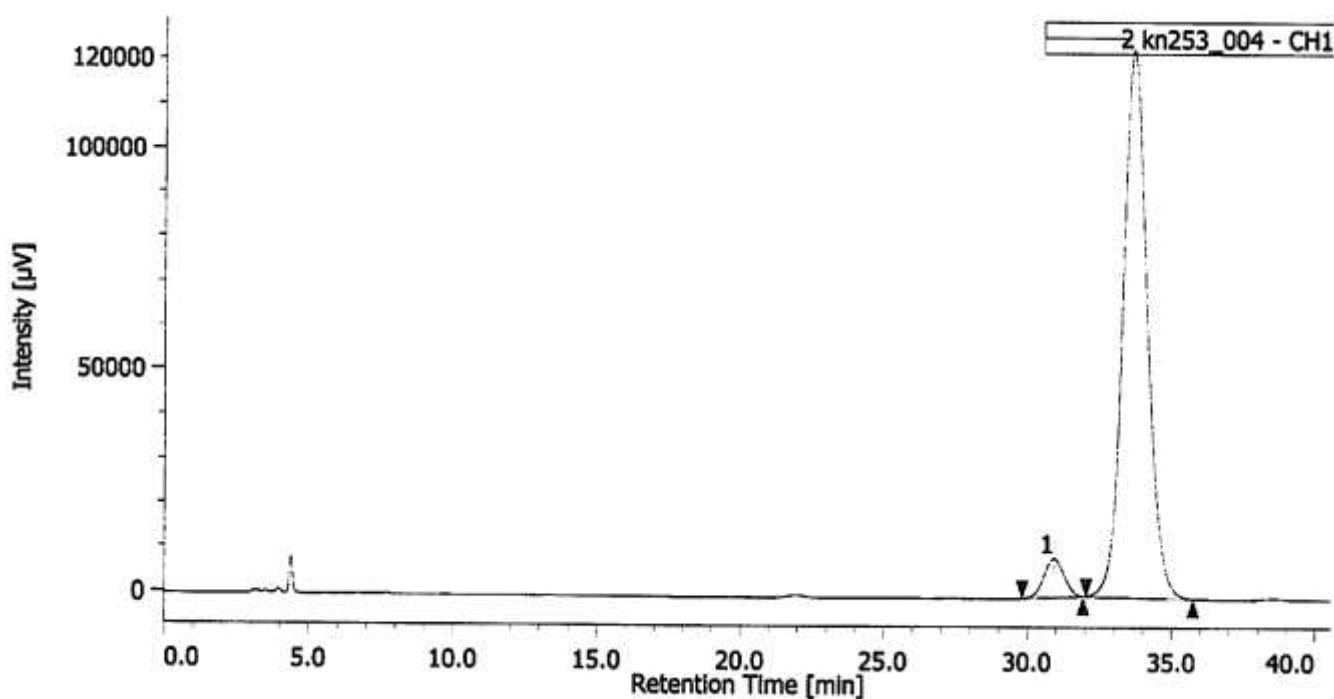

| # | ピーク名    | CH | tR [min] | 面積 [μV·sec] | 高さ [μV] | 面積%    | 高さ%    | 定量値 | NTP  | 分離度   | シンメトリー係数 | 警告 |
|---|---------|----|----------|-------------|---------|--------|--------|-----|------|-------|----------|----|
| 1 | Unknown | 1  | 30.917   | 412638      | 8511    | 5.421  | 6.463  | N/A | 9208 | 1.938 | 1.012    |    |
| 2 | Unknown | 1  | 33.617   | 7199635     | 123177  | 94.579 | 93.537 | N/A | 7983 | N/A   | 1.174    |    |

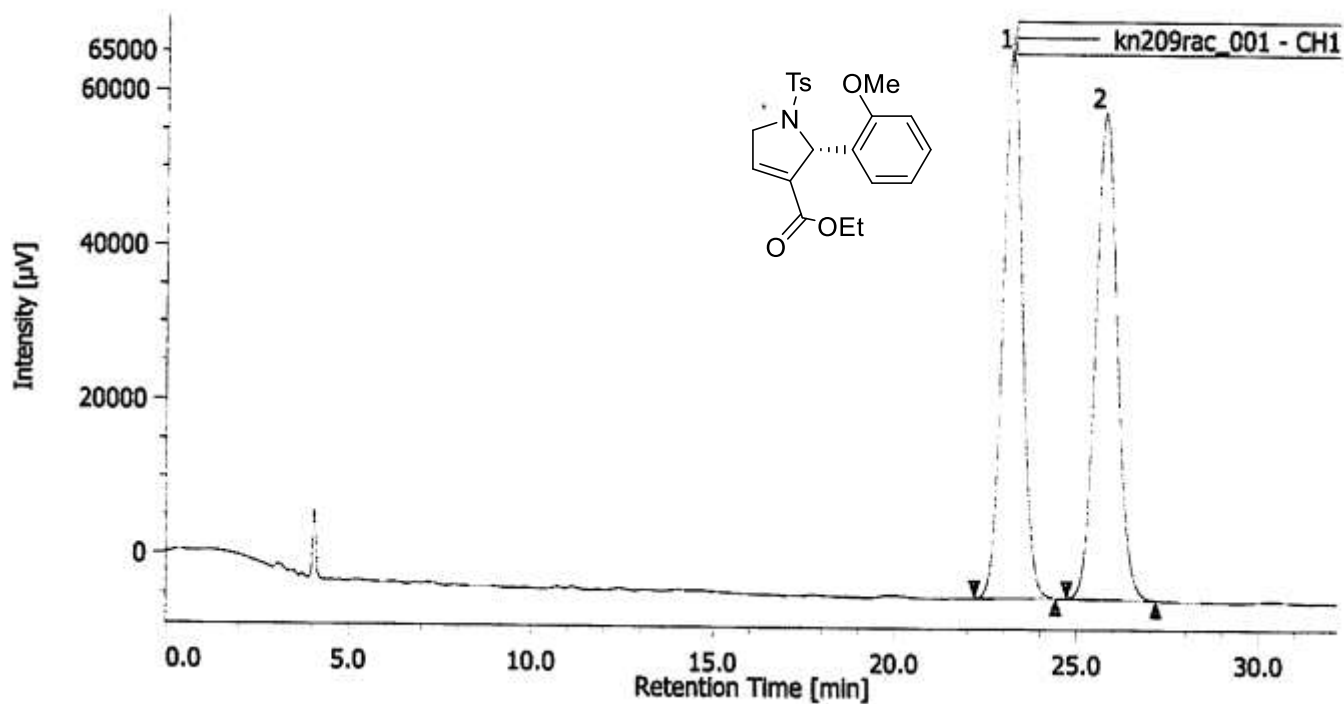

| # | ピーク名    | CH | tR [min] | 面積 [μV·sec] | 高さ [μV] | 面積%    | 高さ%    | 定量値 | NTP  | 分離度   | シンメトリー係数 | 警告 |
|---|---------|----|----------|-------------|---------|--------|--------|-----|------|-------|----------|----|
| 1 | Unknown | 1  | 23.175   | 2602269     | 70837   | 50.051 | 52.940 | N/A | 9394 | 2.536 | 1.093    |    |
| 2 | Unknown | 1  | 25.742   | 2596929     | 62969   | 49.949 | 47.080 | N/A | 9200 | N/A   | 1.133    |    |

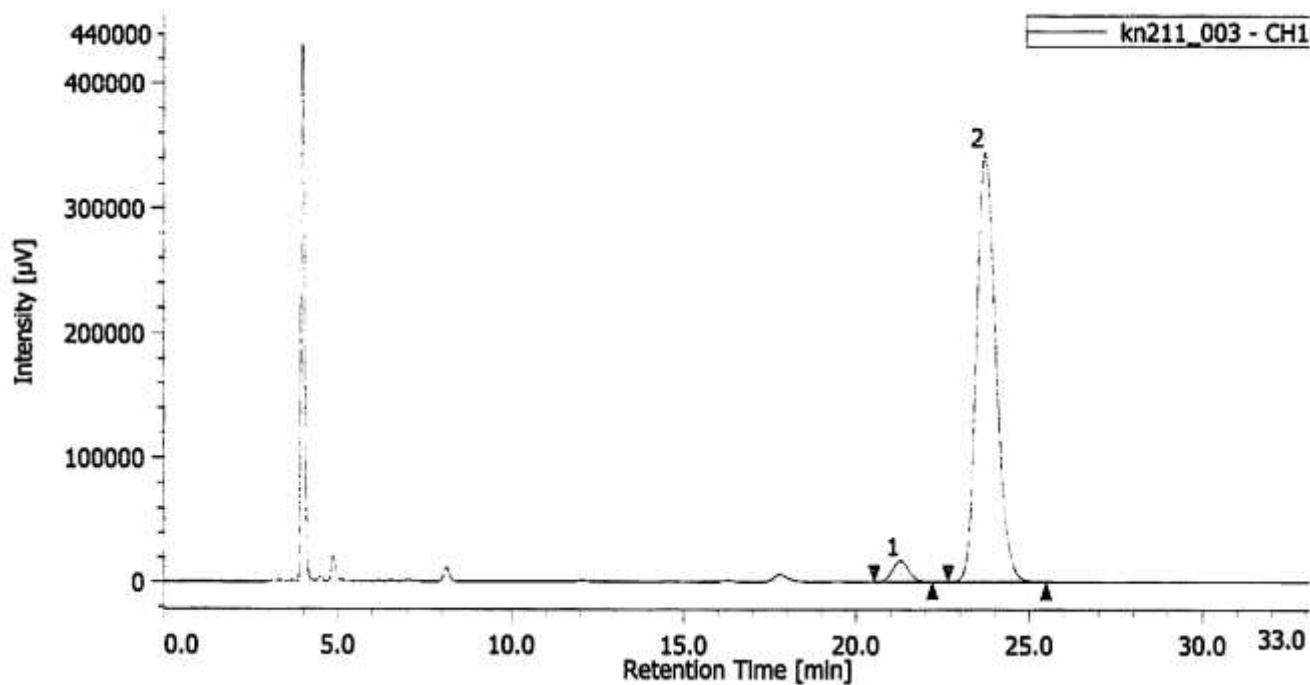

| # | ピーク名    | CH | tR [min] | 面積 [μV·sec] | 高さ [μV] | 面積%    | 高さ%    | 定量値 | NTP  | 分離度   | シンメトリー係数 | 警告 |
|---|---------|----|----------|-------------|---------|--------|--------|-----|------|-------|----------|----|
| 1 | Unknown | 1  | 21.275   | 573945      | 17336   | 4.089  | 4.783  | N/A | 9571 | 2.595 | 1.084    |    |
| 2 | Unknown | 1  | 23.725   | 13528908    | 345133  | 95.931 | 95.217 | N/A | 8594 | N/A   | 1.198    |    |
